# Supplementary material for: LncRNA SNHG17 Contributes to Proliferation, Migration, and Poor Prognosis of Hepatocellular Carcinoma
Source: Hindawi journal article supplement (doi:10.1155/2021/9990338), 2021-01-01
Supplement: f1 [file 9990338.f1.zip]

| Category         | Term                                                                                                          | Count | PValue      |
|------------------|---------------------------------------------------------------------------------------------------------------|-------|-------------|
| GOTERM_MF_DIRECT | metal ion binding                                                                                             | 92    | 9.05E-05    |
| GOTERM_MF_DIRECT | DNA binding                                                                                                   | 63    | 0.045323263 |
| GOTERM_MF_DIRECT | zinc ion binding                                                                                              | 46    | 0.049080945 |
| GOTERM_MF_DIRECT | nucleic acid binding                                                                                          | 43    | 0.013086382 |
| GOTERM_MF_DIRECT | transcription factor activity, sequence-specific DNA binding                                                  | 41    | 0.022166909 |
| GOTERM_MF_DIRECT | protein homodimerization activity                                                                             | 32    | 0.032691732 |
| GOTERM_MF_DIRECT | RNA polymerase II core promoter proximal region sequence-specific DNA binding                                 | 22    | 0.002427141 |
| GOTERM_MF_DIRECT | virus receptor activity                                                                                       | 8     | 0.004850987 |
| GOTERM_MF_DIRECT | transcriptional repressor activity, RNA polymerase II core promoter proximal region sequence-specific binding | 8     | 0.049030087 |
| GOTERM_MF_DIRECT | metallopeptidase activity                                                                                     | 7     | 0.034314727 |
| GOTERM_CC_DIRECT | extracellular region                                                                                          | 70    | 0.0013419   |
| GOTERM_CC_DIRECT | extracellular space                                                                                           | 68    | 2.32E-05    |
| GOTERM_CC_DIRECT | intracellular                                                                                                 | 59    | 0.002283486 |
| GOTERM_CC_DIRECT | integral component of plasma membrane                                                                         | 57    | 0.017489128 |
| GOTERM_CC_DIRECT | cell surface                                                                                                  | 29    | 0.00353868  |
| GOTERM_CC_DIRECT | external side of plasma membrane                                                                              | 14    | 0.011676679 |
| GOTERM_CC_DIRECT | postsynaptic density                                                                                          | 13    | 0.009247856 |
| GOTERM_CC_DIRECT | nucleosome                                                                                                    | 8     | 0.022180842 |
| GOTERM_CC_DIRECT | brush border                                                                                                  | 6     | 0.032906234 |
| GOTERM_BP_DIRECT | transcription, DNA-templated                                                                                  | 76    | 0.018342059 |
| GOTERM_BP_DIRECT | cell adhesion                                                                                                 | 23    | 0.023547693 |
| GOTERM_BP_DIRECT | response to drug                                                                                              | 19    | 0.005453425 |
| GOTERM_BP_DIRECT | cell surface receptor signaling pathway                                                                       | 16    | 0.020360037 |
| GOTERM_BP_DIRECT | regulation of cell proliferation                                                                              | 13    | 0.01089654  |
| GOTERM_BP_DIRECT | platelet degranulation                                                                                        | 9     | 0.013012244 |
| GOTERM_BP_DIRECT | response to endoplasmic reticulum stress                                                                      | 8     | 0.007580686 |
| GOTERM_BP_DIRECT | viral entry into host cell                                                                                    | 8     | 0.010671725 |
| GOTERM_BP_DIRECT | epithelial cell differentiation                                                                               | 7     | 0.019256613 |
| GOTERM_BP_DIRECT | positive regulation of apoptotic signaling pathway                                                            | 4     | 0.0388358   |
