# Supplementary material for: LncRNA SNHG17 Contributes to Proliferation, Migration, and Poor Prognosis of Hepatocellular Carcinoma
Source: Hindawi journal article supplement (doi:10.1155/2021/9990338), 2021-01-01
Supplement: f1 [file 9990338.f1.zip]

| <b>Term</b>                             | <b>Count</b> | <b>Ratio</b> | <b>Corrected_P_Value</b> |
|-----------------------------------------|--------------|--------------|--------------------------|
| Metabolic pathways                      | 45           | 0.031402652  | 1.14E-05                 |
| Herpes simplex virus 1 infection        | 38           | 0.077235772  | 2.26E-14                 |
| Neuroactive ligand-receptor interaction | 15           | 0.044378698  | 0.002798878              |
| Cytokine-cytokine receptor interaction  | 14           | 0.047619048  | 0.002473245              |
| PI3K-Akt signaling pathway              | 14           | 0.039548023  | 0.009534175              |
| Cell adhesion molecules (CAMs)          | 12           | 0.082191781  | 0.000113287              |
| Transcriptional misregulation in cancer | 12           | 0.064516129  | 0.000781924              |
| MicroRNAs in cancer                     | 12           | 0.040133779  | 0.018006855              |
| Human papillomavirus infection          | 12           | 0.036363636  | 0.032918595              |
| cGMP-PKG signaling pathway              | 10           | 0.05988024   | 0.004457159              |
| Alcoholism                              | 10           | 0.055555556  | 0.006816266              |
| Oxytocin signaling pathway              | 9            | 0.058823529  | 0.008790115              |
| Hypertrophic cardiomyopathy (HCM)       | 8            | 0.088888889  | 0.002175118              |
| Systemic lupus erythematosus            | 8            | 0.060150376  | 0.012898088              |
| Jak-STAT signaling pathway              | 8            | 0.049382716  | 0.033020421              |
| Rheumatoid arthritis                    | 7            | 0.076923077  | 0.009102869              |
| Prostate cancer                         | 7            | 0.072164948  | 0.011057824              |
| Hematopoietic cell lineage              | 7            | 0.072164948  | 0.011057824              |
| Apelin signaling pathway                | 7            | 0.051094891  | 0.049265375              |
| p53 signaling pathway                   | 6            | 0.083333333  | 0.013565295              |
