# Supplementary material for: LncRNA SNHG17 Contributes to Proliferation, Migration, and Poor Prognosis of Hepatocellular Carcinoma
Source: Hindawi journal article supplement (doi:10.1155/2021/9990338), 2021-01-01
Supplement: f1 [file 9990338.f1.zip]

| Gene_Symbol  | log2FoldChange | P value     |
|--------------|----------------|-------------|
| AC009086.2   | 21.88161751    | 2.16E-08    |
| AL158066.1   | 21.54480369    | 3.54E-08    |
| AC138696.1   | 20.99742419    | 7.83E-08    |
| AC068234.1   | 19.98331599    | 3.21E-07    |
| AC006547.3   | 9.28990865     | 0.017435392 |
| ZFP91-CNTF   | 9.125988496    | 0.019523274 |
| BORCS7-ASMT  | 9.042662677    | 1.73E-12    |
| MAT1A        | 7.86381279     | 1.84E-08    |
| BIVM-ERCC5   | 7.723711157    | 0.002634526 |
| TBC1D3I      | 7.664990369    | 0.049916186 |
| COL25A1      | 6.904215429    | 1.31E-05    |
| LINC02015    | 6.901184146    | 5.44E-05    |
| MMP23B       | 6.643018529    | 8.98E-05    |
| STRC         | 6.587360344    | 0.001717561 |
| AC022028.2   | 6.418000023    | 0.003838423 |
| C1QTNF9      | 6.352797033    | 0.000353348 |
| PAQR9        | 6.304115748    | 0.000564449 |
| TRIM6-TRIM34 | 6.267886078    | 0.018047157 |
| AC005154.6   | 6.267886078    | 0.018047157 |
| ABCA17P      | 6.265579516    | 0.000357027 |
| AC009927.1   | 6.248229114    | 0.004775535 |
| OLFML3       | 6.247519332    | 0.0007734   |
| NPPC         | 6.213535639    | 0.000589468 |
| DHH          | 6.200957124    | 0.004985836 |
| LINGO1       | 6.195195346    | 0.000814455 |
| PPFIA2       | 6.154671373    | 0.000618489 |
| HULC         | 6.150096109    | 0.000613342 |
| BTN1A1       | 6.143599822    | 0.000812209 |
| AL139039.1   | 6.05990446     | 0.007836045 |
| AL445483.1   | 6.034844168    | 0.001308044 |
| CLEC20A      | 6.016680854    | 0.001169187 |
| AP001107.5   | 5.984186624    | 0.001792001 |
| TONSL-AS1    | 5.982998315    | 0.001386242 |
| AL136309.2   | 5.962105327    | 0.012003639 |
| GPR34        | 5.939073524    | 0.011234022 |
| AC008982.1   | 5.938444456    | 0.000105183 |
| AL713999.1   | 5.932115905    | 0.002193463 |
| SLC4A10      | 5.929284059    | 0.011238256 |
| ZNF98        | 5.912636184    | 0.001918073 |
| RPL12P28     | 5.910630377    | 0.036013299 |
| PDCD6IPP1    | 5.910630377    | 0.036013299 |
| AP003419.4   | 5.867269364    | 0.003713502 |
| AC009336.3   | 5.852353717    | 0.002683813 |
| CLPSL2       | 5.835033066    | 0.012462822 |
| LINC01885    | 5.832232419    | 0.013438427 |
| SORCS1       | 5.828712438    | 0.002581586 |

|              |             |             |
|--------------|-------------|-------------|
| AC068594.1   | 5.794297738 | 0.003553538 |
| AC023824.7   | 5.774913667 | 0.017597086 |
| AC100803.1   | 5.730316682 | 0.003393977 |
| IL1R2        | 5.718715707 | 0.016401253 |
| AP001062.3   | 5.698815983 | 0.017165549 |
| CCDC197      | 5.696872061 | 0.022847477 |
| SMTNL1       | 5.692130679 | 0.007096106 |
| IGFBP7-AS1   | 5.686354647 | 3.73E-05    |
| AC025165.1   | 5.68613588  | 0.018416123 |
| MOBP         | 5.682735248 | 0.004045027 |
| TMEM150C     | 5.67094482  | 0.01840496  |
| AC009097.1   | 5.657768333 | 0.02225692  |
| DHRS9        | 5.650385328 | 0.019171546 |
| AC005034.4   | 5.650385328 | 0.019171546 |
| TRIM60P18    | 5.643302262 | 0.005725363 |
| AC091868.1   | 5.622494012 | 0.006831229 |
| TEKT3        | 5.616624307 | 0.024736059 |
| AC025287.1   | 5.582276685 | 0.034530666 |
| COL6A5       | 5.56198328  | 0.02593279  |
| CCDC54       | 5.52354198  | 0.014134553 |
| AC005052.1   | 5.521125584 | 0.026790286 |
| AC100788.2   | 5.515961545 | 0.008329946 |
| NKAIN4       | 5.511645574 | 0.007409293 |
| AC145423.2   | 5.497074424 | 0.010929524 |
| CATSPERD     | 5.494693324 | 0.008607165 |
| TGM7         | 5.484142161 | 0.029490296 |
| AC145285.4   | 5.462218661 | 0.029904723 |
| AC023644.1   | 5.453679064 | 0.000964561 |
| FBXL7        | 5.446766033 | 0.031506484 |
| HSD17B13     | 5.438502665 | 0.030450388 |
| AL591475.1   | 5.421616813 | 0.033688058 |
| TRIM63       | 5.414292549 | 0.032628133 |
| AC084782.3   | 5.413407966 | 0.038775279 |
| LY96         | 5.384794007 | 0.0112717   |
| CCDC81       | 5.374248692 | 0.039207909 |
| AC012512.1   | 5.366290539 | 0.040866487 |
| AC021549.1   | 5.35700454  | 0.012673476 |
| MAGEB3       | 5.353472477 | 0.040095772 |
| PSMD4P1      | 5.351620354 | 0.039254588 |
| HSPB2        | 5.32817065  | 0.016846411 |
| HIST1H1T     | 5.326057192 | 0.038625353 |
| HOXA11-AS1_2 | 5.32578304  | 8.57E-07    |
| AC005096.1   | 5.312196437 | 0.041126804 |
| RPL12P42     | 5.30907623  | 0.040749842 |
| SOX5         | 5.298231107 | 0.015138543 |
| CD80         | 5.287452129 | 0.042528967 |
| SLAMF7       | 5.283038949 | 0.044453849 |

|              |             |             |
|--------------|-------------|-------------|
| AC244102.1   | 5.269554114 | 0.046571337 |
| AL359551.1   | 5.267450588 | 0.044350583 |
| AL161719.1   | 5.263367686 | 0.01980768  |
| AC113607.1   | 5.256221408 | 0.044100224 |
| AC026464.2   | 5.254708065 | 0.000664458 |
| LINC02404    | 5.228795705 | 0.046508961 |
| AL158196.1   | 5.194613743 | 0.022744227 |
| COX6CP2      | 5.166139458 | 0.02088942  |
| AC113139.1   | 5.148027915 | 0.024091138 |
| MIAT_exon5_3 | 5.118857111 | 0.026844056 |
| GPR18        | 5.038410439 | 0.029998544 |
| ZRANB2-AS1   | 5.021415702 | 0.000197956 |
| AP002812.1   | 4.990188662 | 0.042919269 |
| AL359853.2   | 4.958467427 | 0.033991396 |
| CPLX2        | 4.933703676 | 0.036429331 |
| ANKRD62      | 4.914804862 | 0.038021771 |
| SNORD16      | 4.896055802 | 0.002740518 |
| SIGLEC9      | 4.858814096 | 0.04204612  |
| AC010240.2   | 4.84775439  | 0.044291928 |
| AC093901.1   | 4.811897547 | 0.049884461 |
| AC009163.3   | 4.791365262 | 0.048957682 |
| AC100788.1   | 4.707336448 | 0.001218066 |
| AC107982.1   | 4.699049086 | 0.021052575 |
| AC010997.3   | 4.688126563 | 0.012065856 |
| AC064801.1   | 4.605980955 | 0.023516864 |
| PRLR         | 4.569906829 | 0.00028642  |
| DIO1         | 4.523091369 | 0.021299116 |
| SNORA58B     | 4.438954951 | 0.002412917 |
| CCDC177      | 4.341589682 | 6.29E-05    |
| SNORA1       | 4.269323956 | 0.006403504 |
| AP001527.1   | 4.186251328 | 0.043801947 |
| AC090617.6   | 4.17484569  | 8.13E-09    |
| AC011489.1   | 4.144400937 | 1.91E-19    |
| FYB1         | 3.88974542  | 0.003044312 |
| RAB28P5      | 3.841208874 | 0.032206211 |
| AL645465.1   | 3.831429233 | 0.001707125 |
| LINC02009    | 3.780838718 | 0.00945867  |
| TUBG1P       | 3.771007689 | 0.009751236 |
| AL450326.1   | 3.75153097  | 0.005210336 |
| RGS4         | 3.718072848 | 0.003753264 |
| CLDN14       | 3.703682929 | 0.045474152 |
| MYH16        | 3.701647261 | 0.008937936 |
| AC087190.4   | 3.693886165 | 0.011464472 |
| PLA1A        | 3.572487879 | 0.014982277 |
| MAGI2-AS3    | 3.572087209 | 0.015561416 |
| AC012254.2   | 3.463565284 | 0.01897132  |
| RHCG         | 3.4621248   | 0.004561095 |

|              |             |             |
|--------------|-------------|-------------|
| RN7SL832P    | 3.440745555 | 0.015793148 |
| AL354919.2   | 3.43359894  | 0.022857141 |
| IGDCC4       | 3.421472423 | 0.001863846 |
| MAGEB18      | 3.401286321 | 0.035327838 |
| HSPD1P11     | 3.400630701 | 0.046472687 |
| HMGA1P8      | 3.321667526 | 0.001000878 |
| AP002840.2   | 3.27227505  | 0.041470562 |
| NME9         | 3.240677291 | 0.019847689 |
| TNFRSF14     | 3.224846026 | 2.05E-61    |
| VCX          | 3.195032792 | 0.010396094 |
| PAEP         | 3.179096543 | 0.000396156 |
| TP63         | 3.178323112 | 3.26E-05    |
| AC026471.6   | 3.10479915  | 0.010639422 |
| AC020907.1   | 3.029949364 | 0.006421475 |
| AC037198.3   | 2.985980478 | 0.002720408 |
| PNMA6A       | 2.940177737 | 0.000341854 |
| KLHL10       | 2.918651098 | 0.036908764 |
| NRIP3        | 2.903314454 | 2.34E-07    |
| AC110015.1   | 2.858106829 | 0.017952511 |
| RN7SL657P    | 2.84360587  | 0.033763473 |
| FRMPD4       | 2.831968167 | 0.032371021 |
| RHAG         | 2.8078256   | 0.006552119 |
| AC004637.1   | 2.729609268 | 0.020712887 |
| AC021028.1   | 2.705362565 | 0.037756715 |
| PDXDC2P      | 2.700677124 | 0.017390108 |
| LINC01293    | 2.68990238  | 0.025089666 |
| AC121761.2   | 2.680081006 | 0.026189107 |
| HTR3A        | 2.661732056 | 0.000564351 |
| AC126603.1   | 2.661319384 | 0.027592503 |
| ABHD14A-ACY1 | 2.649379043 | 0.014488888 |
| CLVS1        | 2.631937237 | 0.008137735 |
| DCLK1        | 2.581598489 | 0.007352646 |
| HOXD4        | 2.579892049 | 0.002678799 |
| SCN2A        | 2.561192707 | 0.001045339 |
| AL049830.3   | 2.560166872 | 1.28E-05    |
| AC245096.1   | 2.558653497 | 0.009616977 |
| HLA-J        | 2.543106405 | 0.046386462 |
| PLEKHB1      | 2.541910306 | 0.001023301 |
| AL049697.1   | 2.509950768 | 0.001606759 |
| AC138028.6   | 2.509538673 | 0.010994204 |
| DLGAP3       | 2.492204065 | 0.008879647 |
| AC015818.2   | 2.490529128 | 0.041202628 |
| AC106820.3   | 2.485935113 | 0.021550859 |
| TNFRSF14-AS1 | 2.479804782 | 1.50E-26    |
| AC104452.1   | 2.463591356 | 0.001447395 |
| CATSPERG     | 2.45720186  | 0.007241013 |
| CELF5        | 2.454997855 | 0.031746064 |

|            |             |             |
|------------|-------------|-------------|
| AC120498.9 | 2.430892897 | 0.001817044 |
| AGTR1      | 2.420062164 | 0.000186525 |
| AC007731.5 | 2.383420012 | 0.014739798 |
| SOX21-AS1  | 2.350214769 | 0.028385274 |
| BHLHB9     | 2.347631477 | 7.35E-05    |
| TDO2       | 2.337217199 | 0.018801704 |
| RN7SL751P  | 2.324092771 | 0.035845937 |
| MYO7A      | 2.323237738 | 0.000102718 |
| BMS1P4     | 2.31941077  | 3.18E-06    |
| PACSIN1    | 2.289110028 | 1.09E-07    |
| GAGE12H    | 2.287282889 | 0.022182338 |
| AL117329.1 | 2.280848426 | 0.034867737 |
| CRISPLD1   | 2.264899627 | 0.00404762  |
| LINC02274  | 2.259318669 | 0.004294675 |
| AC110597.3 | 2.258143375 | 0.023800527 |
| ZNF724     | 2.242834936 | 1.46E-15    |
| LINC02535  | 2.241079849 | 0.000188059 |
| SCHIP1     | 2.239876452 | 0.007284685 |
| AC122129.1 | 2.234721443 | 0.002843588 |
| ELFN2      | 2.233570022 | 0.038861777 |
| AC005225.5 | 2.227464964 | 0.012225019 |
| AL162258.2 | 2.227252407 | 4.51E-05    |
| CCNT2-AS1  | 2.226965539 | 0.001790876 |
| AREG       | 2.206185194 | 1.03E-39    |
| HMCN1      | 2.179318571 | 4.06E-05    |
| AC090970.3 | 2.161229917 | 0.008496253 |
| P2RX2      | 2.160674451 | 0.035715934 |
| PPP1R36    | 2.158459652 | 0.001540707 |
| C11orf96   | 2.155869844 | 0.023950611 |
| ZNF624     | 2.131796224 | 5.51E-05    |
| MANEA-AS1  | 2.130400196 | 0.003482635 |
| AC002470.1 | 2.107465281 | 0.028247332 |
| AC245060.5 | 2.0971197   | 0.005951791 |
| DDO        | 2.084812363 | 0.004379199 |
| CYP1B1     | 2.060336444 | 2.88E-24    |
| ZNF658B    | 2.041112176 | 0.013813271 |
| CDRT4      | 2.027757289 | 4.45E-05    |
| SYCE2      | 2.018427026 | 1.78E-08    |
| AL353743.4 | 2.001749905 | 0.037407741 |
| CDK14      | 1.986296765 | 1.64E-34    |
| RASGRF2    | 1.980678188 | 0.048115337 |
| PRKG1      | 1.94869574  | 0.000202636 |
| MAPK8IP2   | 1.946836183 | 3.98E-14    |
| AC100803.2 | 1.938747172 | 0.006138189 |
| AC096887.1 | 1.919015396 | 0.003598064 |
| DUX4L27    | 1.917764628 | 0.011916089 |
| RBBP8NL    | 1.910546532 | 0.040160388 |

|            |             |             |
|------------|-------------|-------------|
| AL591684.2 | 1.910164579 | 0.039890393 |
| AJ271736.1 | 1.896021807 | 0.030727846 |
| LINC02029  | 1.877571445 | 0.01878968  |
| LRRC37A11P | 1.871869749 | 0.034254685 |
| VCX3A      | 1.865551741 | 0.001486449 |
| CD8A       | 1.8363032   | 0.001574851 |
| SOBP       | 1.835816094 | 0.01030862  |
| AL512408.1 | 1.826288676 | 0.000196254 |
| RELN       | 1.819371821 | 0.007780266 |
| ZNF100     | 1.81116056  | 4.67E-11    |
| BMPER      | 1.804236284 | 0.00068207  |
| POU5F1B    | 1.795395389 | 0.001936975 |
| CDH5       | 1.79443984  | 5.18E-07    |
| IL20       | 1.791930972 | 0.043275963 |
| EGF        | 1.781948332 | 0.028291373 |
| ACP5       | 1.773373024 | 0.009114053 |
| AC024257.3 | 1.760786474 | 0.007568073 |
| LINC00880  | 1.755742798 | 0.045219909 |
| LINC02475  | 1.746804817 | 0.047932339 |
| GPR3       | 1.746789896 | 4.29E-20    |
| HIST1H2BJ  | 1.743342997 | 5.26E-09    |
| AL138976.2 | 1.742015315 | 0.041897864 |
| DLEU2_1    | 1.736446364 | 0.019081599 |
| AC010503.4 | 1.734895209 | 0.000421915 |
| AC093495.1 | 1.730542916 | 0.006730489 |
| SP9        | 1.719625791 | 0.019992226 |
| PIWIL2     | 1.717033481 | 0.031074502 |
| CCDC150P1  | 1.71676432  | 4.96E-05    |
| ZNF430     | 1.716754216 | 9.55E-07    |
| AL137002.2 | 1.705298206 | 0.005451725 |
| GAGE2A     | 1.70264206  | 0.000370044 |
| AL117209.1 | 1.700712875 | 0.036841612 |
| TARID      | 1.697380667 | 0.00055455  |
| TEX14      | 1.696382456 | 2.80E-05    |
| AC008406.3 | 1.695559407 | 0.004552669 |
| LHX9       | 1.692768395 | 0.030514809 |
| PTHLH      | 1.690344968 | 0.017091422 |
| AC112220.4 | 1.684591242 | 0.00090188  |
| RNF157     | 1.681556037 | 5.37E-07    |
| C1QTNF2    | 1.67850905  | 2.01E-08    |
| P4HA3      | 1.673784058 | 2.17E-06    |
| PTN        | 1.66463002  | 0.000158959 |
| TMEM200C   | 1.663160536 | 9.06E-05    |
| KCNMB2-AS1 | 1.656173125 | 0.036393252 |
| TPM4       | 1.655166153 | 2.26E-70    |
| NAMPTP1    | 1.653249612 | 0.010115969 |
| S1PR1      | 1.651685983 | 7.50E-13    |

|            |             |             |
|------------|-------------|-------------|
| ABCB4      | 1.651170617 | 0.015403978 |
| AC242426.3 | 1.650531592 | 2.68E-06    |
| AC092279.2 | 1.643407761 | 0.016248525 |
| MXD1       | 1.638037681 | 0.021612097 |
| ATF3       | 1.635620272 | 0.006852698 |
| PELI2      | 1.62971691  | 0.020207679 |
| AC009163.7 | 1.628658753 | 0.036248203 |
| PLAU       | 1.624170556 | 0.000731587 |
| AGT        | 1.621827654 | 2.49E-09    |
| AC087623.4 | 1.618638552 | 0.038669359 |
| PGM2L1     | 1.615335266 | 6.60E-17    |
| AC008764.1 | 1.613274007 | 0.025298664 |
| TRPM2-AS   | 1.610024178 | 9.34E-05    |
| LINC01535  | 1.609913831 | 0.048957716 |
| C3orf52    | 1.607887305 | 4.01E-12    |
| AC016831.1 | 1.607834538 | 0.022062811 |
| PTGS2      | 1.601122364 | 8.31E-46    |
| TNC        | 1.600153399 | 7.61E-13    |
| SLC6A14    | 1.599891422 | 0.048654938 |
| DAND5      | 1.5914552   | 0.040806414 |
| PCDH15     | 1.588885217 | 0.04908635  |
| ARHGAP6    | 1.581592612 | 0.002773758 |
| AC068768.1 | 1.5746918   | 2.46E-06    |
| AC008894.3 | 1.572631962 | 3.51E-46    |
| RASGEF1B   | 1.561060186 | 0.045596528 |
| KLHL35     | 1.560915294 | 6.23E-12    |
| PLPPR4     | 1.550199587 | 0.001937643 |
| GANAB      | 1.549680924 | 8.21E-53    |
| PLAT       | 1.527056175 | 1.64E-13    |
| DLEU2_6    | 1.52588892  | 0.003131183 |
| ANPEP      | 1.525088933 | 0.037128269 |
| NFIX       | 1.520068943 | 0.000224206 |
| NCAM1      | 1.51393806  | 0.006141004 |
| ADGRF4     | 1.509459338 | 0.01051549  |
| AC022400.6 | 1.508821919 | 0.000236859 |
| PACERR     | 1.508470651 | 0.009063076 |
| AC098614.1 | 1.499695879 | 0.003101473 |
| LINC00882  | 1.496558028 | 0.01220656  |
| COCH       | 1.496077769 | 7.33E-07    |
| AC004477.1 | 1.49587274  | 0.013339447 |
| LINC01556  | 1.494821996 | 0.016158391 |
| DMC1       | 1.492425846 | 0.030168016 |
| FNDC4      | 1.487692468 | 0.001171076 |
| CADPS2     | 1.482395316 | 0.003829752 |
| PRTFDC1    | 1.482026312 | 0.000131606 |
| NR4A3      | 1.479189106 | 1.08E-14    |
| ZNF253     | 1.478442485 | 0.005280403 |

|            |             |             |
|------------|-------------|-------------|
| VGf        | 1.47829605  | 0.000905702 |
| AC126544.1 | 1.477055116 | 0.026773086 |
| ZNF658     | 1.476796224 | 0.000338581 |
| C4orf19    | 1.475670794 | 7.46E-07    |
| NECAB1     | 1.47458162  | 0.016886355 |
| LINC01126  | 1.472618009 | 0.038891051 |
| ZNF616     | 1.468661984 | 4.52E-06    |
| SPOCD1     | 1.460068893 | 3.80E-16    |
| ZNF93      | 1.456721955 | 0.001825262 |
| ZBTB43     | 1.456497319 | 0.023848128 |
| KCNS3      | 1.454892806 | 0.012792647 |
| CXCL2      | 1.452987003 | 3.75E-18    |
| NEUROG2    | 1.450937089 | 0.022026476 |
| EMP1       | 1.450098943 | 0.026986754 |
| TMEM33     | 1.442806439 | 1.42E-16    |
| AP001350.2 | 1.44184712  | 0.011966896 |
| GEM        | 1.438285874 | 2.47E-10    |
| DUSP10     | 1.438096736 | 3.05E-14    |
| C1orf140   | 1.435440242 | 0.024501683 |
| USP51      | 1.435413382 | 2.13E-06    |
| G3BP2      | 1.428428845 | 6.76E-33    |
| AC017100.1 | 1.427934605 | 0.041715551 |
| STX12      | 1.42788391  | 3.83E-14    |
| MESP2      | 1.427784866 | 0.000531486 |
| SEPT4      | 1.421104306 | 0.022013194 |
| AC092720.1 | 1.418285145 | 0.000979613 |
| ZNF184     | 1.412327378 | 8.20E-18    |
| AL162377.1 | 1.398359039 | 0.003671565 |
| VASH2      | 1.394053872 | 0.005516828 |
| ZNF14      | 1.381251972 | 0.024712814 |
| CRYAB      | 1.380363014 | 0.040755711 |
| CXCL8      | 1.372620904 | 2.62E-13    |
| VDAC1P8    | 1.372457739 | 1.69E-05    |
| ZNF714     | 1.372016431 | 6.76E-05    |
| TAPT1-AS1  | 1.367517114 | 0.028642096 |
| AL162595.1 | 1.36574469  | 0.047315346 |
| MEMO1P1    | 1.365067171 | 0.040000172 |
| SLC25A21   | 1.363739938 | 0.026883541 |
| SYT11      | 1.358178729 | 0.042366696 |
| MRAS       | 1.352793519 | 1.65E-11    |
| OLFML2B    | 1.352268866 | 0.031085747 |
| RPL18P13   | 1.351932449 | 0.020308961 |
| LGALS8-AS1 | 1.348298152 | 0.036594173 |
| AC004803.1 | 1.346498551 | 0.013212975 |
| LYPD6      | 1.342734376 | 8.33E-09    |
| RNF185     | 1.340646585 | 0.020234873 |
| FGB        | 1.339049871 | 0.027740336 |



|            |             |             |
|------------|-------------|-------------|
| AL513523.1 | 1.333980713 | 0.049799956 |
| RYR2       | 1.330161452 | 2.62E-05    |
| ZNF736     | 1.327260391 | 0.000670985 |
| HIST1H2BD  | 1.325199711 | 4.42E-08    |
| AC087499.1 | 1.324830421 | 0.003276344 |
| SGIP1      | 1.320684169 | 0.04862434  |
| IGFBP1     | 1.319889918 | 0.002863664 |
| ZFAND4     | 1.318273197 | 0.00068745  |
| TOX3       | 1.316324575 | 0.007919638 |
| COL24A1    | 1.311404002 | 0.024217056 |
| AL451074.2 | 1.31087643  | 0.011167717 |
| TM4SF1     | 1.307684496 | 6.88E-23    |
| SEPLG      | 1.30306109  | 0.005507989 |
| LINC01116  | 1.301323224 | 0.020985376 |
| ZNF91      | 1.299575897 | 0.003274926 |
| EXOC3-AS1  | 1.297136405 | 6.82E-12    |
| ZNF204P    | 1.296140887 | 0.040267945 |
| ZNF154     | 1.294930145 | 0.007371452 |
| GNPDA1     | 1.292257215 | 9.34E-21    |
| RDH5       | 1.29038837  | 0.00651346  |
| YEATS2-AS1 | 1.288822672 | 0.004263747 |
| AL135838.1 | 1.287384401 | 0.048780387 |
| RNF138     | 1.286217857 | 3.63E-09    |
| TSLP       | 1.282646341 | 0.002031934 |
| NES        | 1.281526652 | 6.23E-10    |
| DPY19L2P2  | 1.278363961 | 1.14E-05    |
| INHBA      | 1.273883495 | 0.020783472 |
| CRCP       | 1.272121958 | 0.000593647 |
| CREB5      | 1.271292982 | 4.98E-08    |
| SLC2A3     | 1.270024658 | 1.40E-07    |
| LMTK3      | 1.267728068 | 0.000358589 |
| PRSS22     | 1.263694514 | 0.0400536   |
| EOMES      | 1.263013848 | 0.009496137 |
| SESN2      | 1.262520184 | 4.20E-23    |
| ERV3-1     | 1.261166567 | 0.001180821 |
| ASB1       | 1.256300723 | 2.51E-10    |
| ZNF25      | 1.253084527 | 0.005191609 |
| AC092143.3 | 1.251935407 | 0.000125169 |
| AC096733.2 | 1.249866877 | 0.00011052  |
| ZNF426     | 1.244150549 | 2.64E-14    |
| C19orf57   | 1.24383477  | 1.46E-07    |
| PKD4       | 1.243592264 | 2.70E-10    |
| MAGEA2B    | 1.242945814 | 0.005826161 |
| NKX3-1     | 1.241752101 | 0.000435163 |
| EFHC2      | 1.240412498 | 0.047327122 |
| PAG1       | 1.239705289 | 4.92E-08    |
| TRIB3      | 1.2393845   | 8.05E-27    |

|             |             |             |
|-------------|-------------|-------------|
| NFATC2      | 1.239257357 | 0.005139582 |
| CXXC4       | 1.239044198 | 0.038456552 |
| ZNF680      | 1.236662938 | 7.31E-05    |
| RUNDC3B     | 1.231264792 | 0.029483825 |
| RRAGD       | 1.231170961 | 3.22E-13    |
| SPINK1      | 1.227814672 | 0.040447653 |
| AC074091.1  | 1.226683061 | 0.021085973 |
| GOLT1A      | 1.220838088 | 0.002204185 |
| AC080080.1  | 1.220143354 | 0.048351167 |
| LINC00957   | 1.219706945 | 0.022904849 |
| NACAD       | 1.218391522 | 0.003913802 |
| AC133065.4  | 1.213552434 | 0.030646452 |
| IL6R        | 1.212832375 | 2.13E-14    |
| ZNF572      | 1.212763366 | 0.017834726 |
| LIMK1       | 1.212412206 | 3.19E-12    |
| LINC00518   | 1.211754156 | 0.000451284 |
| LPP-AS2     | 1.206763892 | 0.002691522 |
| ZNF766      | 1.206724065 | 7.27E-08    |
| ITGA7       | 1.20600635  | 0.003657742 |
| B4GALT1-AS1 | 1.205791342 | 2.54E-08    |
| RRM2        | 1.20325458  | 2.04E-14    |
| KLF6        | 1.202551502 | 3.29E-13    |
| ZNF554      | 1.200891022 | 7.21E-06    |
| THBS1       | 1.199519853 | 1.04E-30    |
| AC009779.3  | 1.199079585 | 0.001815114 |
| IGFN1       | 1.196517983 | 2.44E-06    |
| ZDHHC16     | 1.194210374 | 8.96E-18    |
| B4GALT4-AS1 | 1.192756445 | 0.044359044 |
| SERPING1    | 1.188922824 | 0.011523712 |
| RCN3        | 1.187615077 | 2.97E-09    |
| ZMAT1       | 1.185776672 | 0.018766222 |
| RGS2        | 1.182155019 | 2.69E-18    |
| AL606834.2  | 1.182107098 | 0.001840236 |
| AC073072.1  | 1.180475237 | 0.000320116 |
| CTSH        | 1.178727658 | 7.21E-05    |
| ZNF726      | 1.177561763 | 0.006593738 |
| LONRF1      | 1.177490001 | 1.11E-08    |
| THRB        | 1.177421882 | 0.000139231 |
| SAMD12      | 1.176129455 | 0.000953426 |
| TXNIP       | 1.174470853 | 1.02E-18    |
| MIR503HG    | 1.166354707 | 0.002157656 |
| GALNT13     | 1.164915907 | 0.001108508 |
| TBC1D9      | 1.164190995 | 1.37E-17    |
| ZNF845      | 1.163239529 | 0.000578486 |
| FGD4        | 1.16321605  | 0.003772171 |
| AC005332.7  | 1.162881334 | 0.000472312 |
| SLC9A3      | 1.161254599 | 1.74E-11    |

|            |             |             |
|------------|-------------|-------------|
| TRIML2     | 1.159464641 | 1.65E-05    |
| GEN1       | 1.158743124 | 0.001198685 |
| ZNF429     | 1.157988367 | 0.042944524 |
| AC015660.1 | 1.157679775 | 0.017027418 |
| RASAL2     | 1.157122136 | 6.75E-18    |
| MIATNB     | 1.156864947 | 0.020061266 |
| ZNF528-AS1 | 1.154286223 | 0.04278525  |
| C3orf67    | 1.153333847 | 0.007464841 |
| PERP       | 1.152624239 | 1.64E-08    |
| AC006252.1 | 1.148949249 | 0.026501915 |
| TMX3       | 1.146931425 | 1.09E-06    |
| ADAMTS3    | 1.146234556 | 0.013554745 |
| BAALC-AS1  | 1.145741643 | 0.043465803 |
| MOXD1      | 1.145362678 | 0.000331068 |
| SCARB2     | 1.145102015 | 2.80E-19    |
| GNA11      | 1.143981643 | 2.65E-06    |
| AP000695.2 | 1.143691902 | 0.043515173 |
| CHST14     | 1.142431442 | 1.47E-18    |
| SNX10      | 1.1395065   | 3.22E-07    |
| AL355001.2 | 1.139153024 | 5.60E-05    |
| RGS19      | 1.138174329 | 6.65E-14    |
| NTN3       | 1.136751157 | 8.85E-09    |
| PARM1      | 1.135173424 | 0.01930262  |
| C1QTNF6    | 1.131547019 | 2.15E-05    |
| AC093010.3 | 1.130520277 | 0.001534379 |
| FAM173B    | 1.12991812  | 2.74E-10    |
| NLGN4X     | 1.12945116  | 0.003056901 |
| TTC33      | 1.128587012 | 1.48E-16    |
| AC073508.2 | 1.128482626 | 0.000109914 |
| LINGO2     | 1.12831956  | 0.0003365   |
| IKZF2      | 1.126160991 | 0.00401998  |
| LINC02228  | 1.126046829 | 0.044257404 |
| ZNF134     | 1.125472021 | 7.61E-08    |
| AL358472.4 | 1.122601804 | 0.004237564 |
| HSD17B14   | 1.122317254 | 0.034210107 |
| AL158151.3 | 1.121392887 | 0.003334553 |
| DGAT2      | 1.120798763 | 7.43E-06    |
| GPR173     | 1.118303804 | 0.014691449 |
| EPDR1      | 1.116017685 | 8.19E-12    |
| HIVEP3     | 1.11528592  | 2.13E-05    |
| C18orf54   | 1.114542016 | 7.60E-06    |
| CTSL       | 1.113404776 | 1.49E-26    |
| HIST1H4H   | 1.113368401 | 0.002150957 |
| RDM1       | 1.112128482 | 0.013093549 |
| MEX3D      | 1.111719734 | 3.98E-20    |
| LBX2-AS1   | 1.108800258 | 0.000332849 |
| FICD       | 1.106929318 | 3.33E-12    |

|             |             |             |
|-------------|-------------|-------------|
| AC092645.1  | 1.105513915 | 3.22E-05    |
| SNAI2       | 1.103652079 | 1.42E-15    |
| FOXP4       | 1.102903215 | 1.20E-18    |
| ZNF860      | 1.101330502 | 1.31E-06    |
| GALNT3      | 1.101244091 | 1.23E-16    |
| CLUHP3      | 1.099951016 | 0.001167851 |
| SERPINB4    | 1.099673225 | 0.046581002 |
| HABP4       | 1.098701543 | 8.86E-12    |
| TCF19       | 1.097101022 | 0.016917796 |
| ATP8B2      | 1.093047254 | 0.000109158 |
| ZNF211      | 1.092581173 | 3.71E-06    |
| AC096887.2  | 1.091745766 | 0.001665408 |
| AL117336.3  | 1.091620471 | 0.011707427 |
| DENND5B-AS1 | 1.088168764 | 0.045056584 |
| GUCY1A2     | 1.086181477 | 0.002026385 |
| ZNF615      | 1.08484987  | 0.023516535 |
| WDFY3-AS2   | 1.084681686 | 0.018711772 |
| CRISPLD2    | 1.083983302 | 1.06E-10    |
| TVP23A      | 1.083940194 | 7.14E-08    |
| ADAMTS5     | 1.079641048 | 1.64E-05    |
| HIST1H3D    | 1.079337629 | 0.031551977 |
| HIST2H2BE   | 1.079097982 | 9.35E-09    |
| DLEU2       | 1.078886652 | 9.16E-05    |
| SYT1        | 1.077989924 | 0.00624798  |
| UBE2D1      | 1.075395494 | 4.32E-06    |
| CXCL3       | 1.07491411  | 5.34E-05    |
| ZNF165      | 1.071999986 | 4.98E-06    |
| ADTRP       | 1.068076726 | 0.020418043 |
| ZFP37       | 1.067329701 | 0.00259221  |
| FLT3LG      | 1.067312552 | 0.0202049   |
| SERPINB3    | 1.066098329 | 0.005797288 |
| PSMB8-AS1   | 1.065115828 | 0.00038056  |
| KALRN       | 1.064910032 | 0.03365974  |
| AL133346.1  | 1.063009    | 3.76E-05    |
| LCORL       | 1.062361095 | 2.54E-08    |
| C14orf28    | 1.060808924 | 0.001145766 |
| AC037198.1  | 1.060779683 | 0.037932964 |
| PLCL1       | 1.057917738 | 0.021997075 |
| KCNH1       | 1.055865739 | 0.036996619 |
| CTAGE7P     | 1.054975882 | 0.03673163  |
| RSPO3       | 1.05497262  | 2.12E-08    |
| GPR183      | 1.054288027 | 0.022789551 |
| BIRC7       | 1.052405824 | 0.023779076 |
| MYBL1       | 1.052334714 | 1.13E-06    |
| VIL1        | 1.046347939 | 5.66E-07    |
| MED11       | 1.044621694 | 2.36E-09    |
| AL513550.1  | 1.043370686 | 0.001991086 |

|            |              |             |
|------------|--------------|-------------|
| DLG2       | 1.04297068   | 0.030500077 |
| AL606489.1 | 1.041653279  | 0.032815775 |
| ZNF17      | 1.039259657  | 0.012380174 |
| DDIT3      | 1.03582164   | 5.38E-05    |
| KRBA2      | 1.034046505  | 0.01622818  |
| ZNF675     | 1.032016291  | 0.000170222 |
| SLC7A8     | 1.031784901  | 2.61E-08    |
| AL121944.1 | 1.028302598  | 0.005186491 |
| AC241585.1 | 1.027564905  | 0.036450122 |
| ZNF26      | 1.027301579  | 1.12E-09    |
| ZNF45      | 1.026054309  | 6.29E-05    |
| SPOPL      | 1.025271639  | 5.92E-10    |
| FUT4       | 1.024809413  | 0.001847865 |
| FNDC10     | 1.023694439  | 3.01E-11    |
| IL6        | 1.020878634  | 2.56E-15    |
| ATF1       | 1.020642274  | 4.06E-14    |
| BOLA3-AS1  | 1.020547257  | 0.004228794 |
| ZMYND10    | 1.019395497  | 0.042803824 |
| BHLHE41    | 1.017724241  | 0.000580742 |
| LATS2      | 1.017368671  | 2.11E-16    |
| MYO15B     | 1.015606744  | 0.000281117 |
| B4GALT1    | 1.012748347  | 7.42E-24    |
| GPR143     | 1.012150819  | 0.034141984 |
| AC092295.2 | 1.010428012  | 0.002506667 |
| GRIN1      | 1.009725399  | 0.011220199 |
| PRR16      | 1.008937878  | 0.007838588 |
| UBE2Q2P1   | 1.007787684  | 0.04753924  |
| PDE9A      | 1.006754985  | 2.51E-05    |
| CREBRF     | 1.006535771  | 9.20E-06    |
| GPAT3      | 1.006346564  | 0.002735277 |
| ZNF227     | 1.006302496  | 9.41E-06    |
| ZNF484     | 1.005528933  | 3.82E-05    |
| POMK       | 1.005353047  | 0.001511732 |
| ZNF257     | 1.00353524   | 0.002257422 |
| ZNF84      | 1.002724404  | 0.000313815 |
| ETAA1      | 1.00140493   | 5.96E-06    |
| ZBED3-AS1  | -1.00057892  | 0.02896187  |
| ALDH3A2    | -1.002735103 | 2.01E-06    |
| GCGR       | -1.003171295 | 0.028725641 |
| HPD        | -1.005129768 | 0.000155073 |
| ST6GALNAC6 | -1.005381844 | 0.000133636 |
| MAB21L3    | -1.005464978 | 0.019265607 |
| ADAM9      | -1.006447458 | 3.15E-11    |
| SLC1A3     | -1.006915051 | 0.00024256  |
| MAN2A1     | -1.007282047 | 7.11E-13    |
| MYEOV      | -1.009194006 | 0.003261402 |
| DMBT1      | -1.009698129 | 0.017234824 |

|            |              |             |
|------------|--------------|-------------|
| AC010733.2 | -1.010982079 | 0.008134817 |
| EVI2B      | -1.013072401 | 0.01745221  |
| AC121761.1 | -1.019708972 | 0.003267859 |
| AC104447.1 | -1.02011369  | 0.002932559 |
| ZNF296     | -1.020776843 | 0.000450145 |
| NOL4L      | -1.022897748 | 3.40E-11    |
| IQCH       | -1.023002394 | 0.00598031  |
| NEK6       | -1.025640131 | 1.69E-15    |
| CCND1      | -1.028347749 | 4.96E-26    |
| AC017083.4 | -1.030781976 | 0.000293786 |
| TSSK5P     | -1.032990867 | 0.015999312 |
| MAMDC2     | -1.033744125 | 0.014734697 |
| AVIL       | -1.03433244  | 0.022548774 |
| AC245041.1 | -1.036925684 | 5.45E-07    |
| CCDC51     | -1.037245318 | 1.82E-15    |
| DDX60      | -1.039102032 | 2.75E-08    |
| AC127496.7 | -1.040221101 | 0.026010523 |
| AL513302.2 | -1.043397844 | 0.005124862 |
| ADGRG3     | -1.04548658  | 0.000328399 |
| RN7SL1     | -1.049220257 | 0.031483685 |
| CYSRT1     | -1.051156901 | 4.40E-07    |
| LINC01679  | -1.053944194 | 0.025276975 |
| NSF        | -1.055875217 | 3.17E-13    |
| AL513497.1 | -1.05607642  | 0.029570166 |
| AL132655.2 | -1.05775716  | 0.037762513 |
| NOL9       | -1.058661232 | 2.27E-13    |
| RIPOR2     | -1.061157529 | 0.006447056 |
| ABCC3      | -1.065292318 | 8.04E-25    |
| SUSD2      | -1.066281867 | 3.44E-06    |
| OASL       | -1.069351752 | 3.49E-21    |
| PRSS36     | -1.070248947 | 0.016664167 |
| TNS4       | -1.073552161 | 2.87E-27    |
| CCL5       | -1.076162343 | 1.24E-05    |
| NNAT       | -1.076412087 | 0.037230027 |
| USP32P3    | -1.076965617 | 0.00286924  |
| AC104825.2 | -1.078244346 | 0.047785838 |
| SRD5A3-AS1 | -1.084238322 | 0.043828127 |
| ANKRD34A   | -1.084437519 | 0.000103671 |
| TINAGL1    | -1.08669291  | 3.62E-19    |
| INPP4A     | -1.086918236 | 2.92E-15    |
| FRGCA      | -1.087861293 | 0.003348928 |
| C1orf116   | -1.08838302  | 0.04112067  |
| TJP3       | -1.089248304 | 5.05E-06    |
| LIMS1      | -1.092238266 | 0.01336841  |
| LINC01128  | -1.092728972 | 0.005007948 |
| UBASH3B    | -1.094535001 | 7.14E-12    |
| INHBB      | -1.095165185 | 0.017128193 |

|            |              |             |
|------------|--------------|-------------|
| MMRN2      | -1.102315218 | 0.023683926 |
| ARMC10     | -1.103017831 | 2.93E-06    |
| FAM89A     | -1.108644483 | 0.040564535 |
| AC097461.1 | -1.112720722 | 0.014706417 |
| GXYLT2     | -1.120448028 | 0.014697769 |
| MLXIPL     | -1.120732421 | 0.000287074 |
| VLDLR      | -1.123285546 | 8.17E-14    |
| ACE        | -1.12426016  | 0.016240069 |
| GALNT4     | -1.124747359 | 0.000197727 |
| AC005586.2 | -1.130892841 | 0.000345961 |
| CYP1A1     | -1.139893609 | 4.25E-06    |
| SNX18P7    | -1.141031227 | 0.005864268 |
| NANOS1     | -1.141184966 | 0.00130281  |
| LRGUK      | -1.141239483 | 0.008558985 |
| PITX3      | -1.146490251 | 0.001155976 |
| CFAP54     | -1.15314305  | 0.009851738 |
| SPDYE3     | -1.153331651 | 0.000489431 |
| DAPP1      | -1.164790065 | 0.014950133 |
| CALM2P2    | -1.168807357 | 0.046623837 |
| RHPN1      | -1.169741277 | 4.07E-06    |
| AL451042.2 | -1.178946196 | 0.019291892 |
| AP002387.1 | -1.179524222 | 0.039689529 |
| SAPCD1     | -1.180814478 | 0.013397348 |
| AC092134.1 | -1.180942672 | 0.017346    |
| P2RY11     | -1.182902319 | 0.004346094 |
| AC010442.2 | -1.183034577 | 0.048758846 |
| RARRES3    | -1.185459982 | 1.16E-12    |
| AL096870.2 | -1.185933544 | 0.019556857 |
| UGT1A7     | -1.186404401 | 4.46E-06    |
| EPHB4      | -1.186845218 | 1.56E-25    |
| AC105285.1 | -1.187926704 | 0.000141936 |
| SAMD8      | -1.189347505 | 8.18E-06    |
| AL603750.1 | -1.19215682  | 0.043876983 |
| AC093525.6 | -1.193280705 | 0.004057266 |
| PPM1J      | -1.196782265 | 0.031165521 |
| CACNG6     | -1.197325775 | 0.042871825 |
| AC040162.1 | -1.198909074 | 0.007244641 |
| SOCS1      | -1.199197282 | 0.016120617 |
| PXK        | -1.200247169 | 4.64E-08    |
| AC084876.1 | -1.201139422 | 0.019699401 |
| CMTM4      | -1.202178522 | 3.04E-26    |
| LINC01759  | -1.202881411 | 0.006809553 |
| PECAM1     | -1.202946518 | 0.043498255 |
| LINC00570  | -1.208250909 | 0.021043444 |
| PPM1E      | -1.214038579 | 1.28E-06    |
| POLN       | -1.215940696 | 0.013707417 |
| TMEM63C    | -1.221430701 | 0.039035663 |

|              |              |             |
|--------------|--------------|-------------|
| SERPINB7     | -1.223393457 | 0.000816679 |
| KDM1B        | -1.225511555 | 1.73E-11    |
| ATP2A2       | -1.234884743 | 9.58E-28    |
| AC020978.10  | -1.235043779 | 0.000451773 |
| AC005034.3   | -1.23600705  | 2.16E-08    |
| KLHL30       | -1.238397911 | 1.95E-05    |
| AP003469.4   | -1.254026674 | 0.038691171 |
| LMO4         | -1.256830616 | 2.14E-29    |
| FLJ31104     | -1.260467287 | 0.033888767 |
| AC234582.1   | -1.261382681 | 0.000512027 |
| SRMS         | -1.263569775 | 0.016358845 |
| ASNS         | -1.280246327 | 4.31E-11    |
| GRIN3B       | -1.281170602 | 0.049964201 |
| SLC12A3      | -1.288284473 | 5.83E-30    |
| GACAT2       | -1.28871477  | 0.009728349 |
| HMGA2        | -1.290891605 | 0.000514793 |
| RNA5-8SN4    | -1.293617777 | 0.001769115 |
| EXOC3L4      | -1.293653732 | 0.002242517 |
| HTR1D        | -1.295241885 | 2.23E-15    |
| FBXO36       | -1.296321621 | 0.00071956  |
| HSPB6        | -1.300215406 | 0.018280787 |
| AC080038.3   | -1.308173972 | 0.004465671 |
| AKR1B15      | -1.308363136 | 0.008449675 |
| FAM71E1      | -1.309614082 | 0.031790219 |
| RNF38        | -1.313306777 | 6.65E-14    |
| BTBD19       | -1.314102118 | 0.001426094 |
| FAM86C2P     | -1.316284584 | 1.46E-06    |
| SEMA3G       | -1.316316083 | 0.002399885 |
| SSC4D        | -1.319834433 | 2.16E-06    |
| RNA5-8SN1    | -1.320247654 | 0.013469732 |
| ASPHD2       | -1.32337242  | 0.041858942 |
| NONOP2       | -1.324111108 | 0.022052225 |
| AC005034.5   | -1.328282054 | 0.041715219 |
| CLDN4        | -1.329585754 | 1.36E-05    |
| HCG25        | -1.331743154 | 0.004074904 |
| AL358790.1   | -1.33208541  | 0.008968688 |
| ZHX1-C8orf76 | -1.33537967  | 0.014331428 |
| CLIC3        | -1.338669221 | 0.000102774 |
| GARNL3       | -1.342869354 | 0.002496337 |
| RNA5-8SN5    | -1.352691179 | 0.000744958 |
| ENTPD7       | -1.354387529 | 8.94E-16    |
| RSPH4A       | -1.356023672 | 0.041653337 |
| VWCE         | -1.361135367 | 0.012077378 |
| A2M          | -1.362042606 | 0.040981444 |
| C20orf196    | -1.363656968 | 0.006544525 |
| CCNG1        | -1.365895609 | 6.77E-11    |
| PRELID2      | -1.369922352 | 1.53E-10    |



|              |              |             |
|--------------|--------------|-------------|
| PHOSPHO1     | -1.372654047 | 0.037973347 |
| BASP1        | -1.37463577  | 8.15E-46    |
| SIRT4        | -1.381855537 | 0.000417659 |
| TRIM22       | -1.384012812 | 0.011187451 |
| DNAAF3       | -1.387823119 | 6.82E-05    |
| AC005324.5   | -1.394012844 | 6.73E-07    |
| SLC12A5      | -1.39445413  | 0.023401268 |
| DDAH1        | -1.399598463 | 8.97E-28    |
| AC006262.2   | -1.401545997 | 0.012310846 |
| MIR22HG      | -1.407500564 | 8.00E-08    |
| AC089983.1   | -1.410649484 | 5.64E-10    |
| LINC00920    | -1.42473044  | 0.000549714 |
| CCL22        | -1.432483233 | 0.03693134  |
| DGCR9        | -1.444036664 | 0.019578729 |
| CLDN9        | -1.450126492 | 0.031903288 |
| AL023284.4   | -1.451301865 | 0.032253958 |
| AC004520.1   | -1.453619357 | 0.018986449 |
| AC090510.1   | -1.469820568 | 0.041105238 |
| AKR1C1       | -1.472637331 | 2.83E-29    |
| GGT5         | -1.481429606 | 0.001235884 |
| MERTK        | -1.495289402 | 0.032502892 |
| GSTM2        | -1.495733238 | 0.007489138 |
| AL035413.2   | -1.497711285 | 0.033517043 |
| AC139795.2   | -1.498545479 | 0.002264119 |
| GFM2         | -1.500484289 | 2.97E-37    |
| GSDMB        | -1.504510059 | 7.70E-05    |
| AP005264.1   | -1.505918784 | 0.032028321 |
| SNHG17       | -1.506402759 | 5.08E-22    |
| TPP1         | -1.5082058   | 2.96E-34    |
| BORCS8-MEF2B | -1.514190937 | 0.000240196 |
| TOMM6        | -1.538073071 | 5.30E-08    |
| GBP4         | -1.559034661 | 0.006857229 |
| LINC01970    | -1.580897245 | 0.011420628 |
| G6PD         | -1.582887916 | 3.55E-45    |
| TMEM52       | -1.588692021 | 0.024541138 |
| AC018629.1   | -1.597983196 | 1.95E-06    |
| SLC25A23     | -1.608210875 | 1.84E-27    |
| DDIAS        | -1.612551323 | 5.52E-08    |
| EFCAB12      | -1.612814495 | 0.042093057 |
| STMN3        | -1.616341947 | 0.003650373 |
| AC097662.1   | -1.61955443  | 0.049568464 |
| ACE2         | -1.620129709 | 0.002325772 |
| PHC1         | -1.622473501 | 0.005154436 |
| GLI1         | -1.63798015  | 0.000639198 |
| TMEM171      | -1.652436269 | 0.010432719 |
| TMIE         | -1.652895346 | 0.017988654 |
| AC116366.1   | -1.652952152 | 0.003384858 |

|               |              |             |
|---------------|--------------|-------------|
| AC105052.1    | -1.665763343 | 0.012569028 |
| FLJ22447      | -1.675029234 | 0.003291363 |
| EXTL3-AS1     | -1.681221072 | 0.014431227 |
| NDUFC2-KCTD14 | -1.682751649 | 0.000456864 |
| CARNMT1       | -1.685103847 | 1.00E-19    |
| SCO2          | -1.68658873  | 0.002874421 |
| AC007114.1    | -1.692125502 | 0.014562017 |
| AC007161.3    | -1.697997287 | 0.000542252 |
| SLC4A8        | -1.701511523 | 0.028968551 |
| SOCS2-AS1     | -1.707251452 | 0.032457925 |
| HIST1H4C      | -1.710904858 | 0.017008378 |
| AMY2B         | -1.713811616 | 0.000779145 |
| CLSTN2        | -1.71405695  | 0.003184912 |
| CDH1          | -1.723882834 | 0.02322824  |
| KRT87P        | -1.73074135  | 9.68E-07    |
| KCNH2         | -1.735654532 | 0.019821675 |
| RASA4CP       | -1.759490285 | 0.010431505 |
| AC007238.1    | -1.767597731 | 0.041048863 |
| AL669918.1    | -1.769750487 | 0.012587226 |
| NFAM1         | -1.769830751 | 0.019020727 |
| LINC02361     | -1.783667081 | 0.019230587 |
| ACSM5         | -1.79102745  | 0.029495274 |
| PCAT6         | -1.816623112 | 0.002464398 |
| CD7           | -1.820453151 | 0.001663175 |
| HNRNPA1P49    | -1.826974008 | 0.020668662 |
| C1orf220      | -1.83187848  | 0.002314371 |
| AP002336.2    | -1.839563643 | 0.044352921 |
| KLRG1         | -1.848146619 | 0.002150762 |
| ANKRD2        | -1.861036726 | 3.19E-09    |
| CTRB2         | -1.866407933 | 0.003735817 |
| AC020978.8    | -1.900872172 | 0.000104735 |
| AL355802.3    | -1.912196531 | 0.000149913 |
| AC017074.1    | -1.924784577 | 0.023469849 |
| ZNF571-AS1    | -1.935717011 | 0.044945711 |
| AKR1C2        | -1.959465688 | 3.09E-12    |
| AC007192.2    | -1.974790846 | 0.002581221 |
| NHLH1         | -1.984744889 | 0.003360532 |
| MILR1         | -1.993425578 | 0.006952929 |
| LCTL          | -2.00573627  | 0.003414172 |
| ERH           | -2.024561071 | 7.92E-65    |
| AC022400.3    | -2.081932951 | 0.004125967 |
| HOXA2         | -2.092491169 | 0.021725992 |
| APOBR         | -2.099172089 | 0.000250715 |
| AC023043.2    | -2.113239603 | 0.00906188  |
| AL359922.1    | -2.117052039 | 0.003568544 |
| PLA2G4B       | -2.131986127 | 0.012570372 |
| RN7SK         | -2.144264498 | 1.20E-12    |

|             |              |             |
|-------------|--------------|-------------|
| RRAD        | -2.157401032 | 0.043187134 |
| C1orf228    | -2.159640207 | 0.003609144 |
| MIR31HG     | -2.166931813 | 1.35E-11    |
| AC087392.3  | -2.180271186 | 0.014671864 |
| ROBO1       | -2.18778612  | 2.28E-43    |
| AP001148.1  | -2.210380372 | 0.005435903 |
| AC013643.3  | -2.215377967 | 0.044482704 |
| TBCA        | -2.278903462 | 5.86E-63    |
| AL390066.1  | -2.314365604 | 0.009330169 |
| AC006486.1  | -2.320507359 | 0.02748444  |
| AVPR2       | -2.382239471 | 0.024360784 |
| TTC28-AS1_2 | -2.386488201 | 0.007195789 |
| KCNK9       | -2.405495843 | 0.045288257 |
| CA14        | -2.42835676  | 0.029794111 |
| KCTD19      | -2.428396147 | 0.041617137 |
| CPA2        | -2.489530306 | 0.031707044 |
| AP000777.3  | -2.494206648 | 0.024355811 |
| IFNWP19     | -2.520001934 | 2.12E-15    |
| AP001160.2  | -2.538017074 | 0.010866602 |
| OXTR        | -2.556174291 | 0.017626559 |
| AC080162.1  | -2.572098412 | 0.030646197 |
| GABRR2      | -2.5797233   | 0.022083863 |
| LGALS9B     | -2.583676573 | 2.71E-05    |
| FER1L4      | -2.606241999 | 1.16E-05    |
| CFAP43      | -2.608362139 | 0.010791925 |
| AC012377.1  | -2.635495571 | 0.028236395 |
| AC100827.3  | -2.656904457 | 0.000265646 |
| GJA5        | -2.658051859 | 0.007413743 |
| CLCA2       | -2.662540161 | 0.009930451 |
| ALG1L7P     | -2.663451991 | 0.01811064  |
| ELOCP19     | -2.685888623 | 0.046194751 |
| AL161937.2  | -2.713405155 | 0.0253121   |
| BCRP7       | -2.737786513 | 0.027005132 |
| LINC01219   | -2.748967484 | 0.00385038  |
| CYP4F3      | -2.808597682 | 0.005682226 |
| MIR3074     | -2.865275456 | 0.022404475 |
| TUBA8       | -2.893850561 | 9.62E-06    |
| AC011445.1  | -2.90757466  | 1.52E-08    |
| AC073610.1  | -3.022545271 | 0.014052893 |
| LINC02280   | -3.074809439 | 0.03068403  |
| SNORD22     | -3.095586566 | 0.046299783 |
| TSPAN6      | -3.102142386 | 1.42E-46    |
| ATP6V1C2    | -3.105482626 | 0.00204579  |
| USP12-AS2   | -3.106091854 | 0.048610949 |
| RPS20P21    | -3.18012928  | 0.019632036 |
| MIR34AHG    | -3.185688469 | 0.046853273 |
| AC084337.2  | -3.320133294 | 0.028446976 |

|            |              |             |
|------------|--------------|-------------|
| AL691442.1 | -3.38169834  | 0.001332749 |
| C1QTNF4    | -3.401391849 | 0.028706096 |
| SLC23A3    | -3.4581885   | 0.020597993 |
| MIR137     | -3.477228854 | 0.014315351 |
| KRT8P45    | -3.493483114 | 0.020027504 |
| AC027307.3 | -3.511779925 | 0.020823604 |
| AC087632.1 | -3.535503603 | 1.94E-14    |
| CAPN3      | -3.58121113  | 0.013491435 |
| CD226      | -3.581628905 | 0.009149055 |
| AC020907.4 | -3.663860362 | 0.019702859 |
| Z98884.2   | -3.6638898   | 0.031503218 |
| CYP4F11    | -3.679679651 | 6.32E-05    |
| PKN2-AS1   | -3.693780377 | 0.005988314 |
| AC020634.1 | -3.695125265 | 0.018262475 |
| AL512274.1 | -3.761588774 | 0.020283877 |
| FGF7P3     | -3.799381406 | 7.43E-05    |
| PKP4-AS1   | -3.85687297  | 0.00850322  |
| MICD       | -3.89794832  | 0.045372734 |
| SLC47A1P1  | -3.924683013 | 0.032051987 |
| AC141557.1 | -4.100399699 | 0.044273105 |
| AC126182.2 | -4.13396809  | 0.049917746 |
| LINC01376  | -4.205637832 | 0.002757828 |
| HIST1H3J   | -4.212581994 | 0.00021516  |
| AC090695.1 | -4.268481545 | 0.009705529 |
| AC073487.1 | -4.340466396 | 0.042216146 |
| UBE2L5P    | -4.346864852 | 0.028453452 |
| AC005041.1 | -4.381539103 | 0.01030345  |
| AC067968.1 | -4.493268786 | 0.001487304 |
| RFPL3S     | -4.725609473 | 0.01436918  |
| PCDHGA12   | -4.731303017 | 0.049727326 |
| AL583722.4 | -4.731303017 | 0.049727326 |
| AC008013.1 | -4.761534843 | 0.047411841 |
| TAS2R19    | -4.761810954 | 0.047204721 |
| NOS2P3     | -4.761810954 | 0.047204721 |
| AL627389.1 | -4.805183303 | 0.046706654 |
| TCTE1      | -4.83454448  | 0.048996903 |
| AL353719.1 | -4.837713004 | 0.038963087 |
| AC004461.2 | -4.851496753 | 0.042020429 |
| GKN2       | -4.851985656 | 0.03949223  |
| CYCSP10    | -4.861730395 | 0.001096847 |
| RPSAP13    | -4.915622905 | 0.038079134 |
| ZFP57      | -4.916622885 | 0.032598376 |
| ABCA9      | -4.926631067 | 0.031814009 |
| AC007272.1 | -4.926631067 | 0.031814009 |
| AC064807.2 | -4.926631067 | 0.031814009 |
| ERVMER34-1 | -4.968770834 | 0.032379721 |
| ALG1L2     | -4.984752246 | 0.027188597 |

|            |              |             |
|------------|--------------|-------------|
| AL583810.1 | -4.995563603 | 0.008654663 |
| AL138995.1 | -5.017024647 | 0.028070169 |
| DCDC1      | -5.040759501 | 0.026833312 |
| LMO2       | -5.044002259 | 0.026144752 |
| AC011498.5 | -5.052994372 | 0.02360884  |
| TXNP6      | -5.062113036 | 0.022393645 |
| AL121894.2 | -5.062560396 | 0.023170337 |
| SNORA18    | -5.063479972 | 0.001986257 |
| AC026954.2 | -5.074628124 | 0.010970448 |
| AP001266.2 | -5.07477395  | 0.022622313 |
| AC005618.1 | -5.077466311 | 0.021723256 |
| GYG2       | -5.092972313 | 0.023793249 |
| AP001025.1 | -5.109266182 | 0.024203235 |
| APOBEC3A   | -5.135966633 | 0.018211724 |
| LINC00221  | -5.136179839 | 0.019252501 |
| AC118658.2 | -5.16477425  | 0.048622837 |
| ARL11      | -5.165127844 | 0.020308208 |
| KRTAP5-2   | -5.168149243 | 0.021593214 |
| ANO5       | -5.168336232 | 0.047819083 |
| AL355922.3 | -5.176863175 | 0.047970697 |
| AC073326.1 | -5.18228178  | 0.047079817 |
| C3orf20    | -5.205406674 | 0.016593799 |
| AC046134.1 | -5.207487653 | 0.029670805 |
| AC063944.1 | -5.222597014 | 0.015446754 |
| AL162456.1 | -5.229448811 | 0.046649288 |
| AL590302.2 | -5.236716333 | 0.041841998 |
| PRG2       | -5.238185827 | 0.001969586 |
| SCG3       | -5.240420496 | 0.044841689 |
| AC127496.5 | -5.2585562   | 0.017907103 |
| AC132938.5 | -5.258790736 | 0.015510342 |
| WDR72      | -5.27007836  | 0.012404451 |
| PRR35      | -5.289143615 | 0.038567245 |
| P2RX6P     | -5.313752535 | 0.012068106 |
| MIRLET7I   | -5.328775794 | 0.010424884 |
| PSAPL1     | -5.331414333 | 0.010288561 |
| AC087385.1 | -5.362002692 | 0.033170744 |
| AL158835.3 | -5.362002692 | 0.033170744 |
| ITGA11     | -5.370537781 | 0.010278734 |
| AC010503.2 | -5.373514964 | 0.032580602 |
| AL158071.4 | -5.383343913 | 0.009998654 |
| AL121839.2 | -5.416202458 | 0.01040272  |
| AC107067.1 | -5.422342303 | 0.011186768 |
| KLHDC1     | -5.433684308 | 0.031313736 |
| LINC00441  | -5.442485889 | 0.032159101 |
| AC244033.1 | -5.449563455 | 0.007752092 |
| CORO2B     | -5.465227133 | 0.027696199 |
| OR1F12     | -5.512956238 | 0.024213533 |

|                 |              |             |
|-----------------|--------------|-------------|
| TMX2-CTNND1     | -5.513771105 | 0.026741548 |
| SCTR            | -5.528960232 | 0.008385624 |
| ST8SIA6-AS1     | -5.545660839 | 0.026425438 |
| AL031731.1      | -5.555540941 | 0.005755488 |
| AC241644.3      | -5.586130336 | 0.021490899 |
| TXNRD3NB        | -5.594425704 | 0.020154924 |
| AC007663.1      | -5.614151824 | 0.007005918 |
| AC099336.1      | -5.625403989 | 0.018631834 |
| PRAP1           | -5.645717623 | 0.022817023 |
| MGARP           | -5.677620575 | 0.016921512 |
| FCN2            | -5.689303784 | 0.018887057 |
| AC138356.1      | -5.717767158 | 0.004060481 |
| NPC1L1          | -5.725700286 | 0.004334137 |
| TTLL13P         | -5.754925987 | 0.017445537 |
| MYO16-AS1       | -5.759506778 | 0.002959992 |
| AL365226.1      | -5.769062473 | 0.004320725 |
| AC244034.3      | -5.808683279 | 0.012727841 |
| PSPC1P1         | -5.811678816 | 0.038703581 |
| AC018616.1      | -5.838940845 | 0.002033177 |
| AC105339.2      | -5.887706321 | 0.00990506  |
| CELF6           | -5.90081513  | 0.002713874 |
| AGAP11          | -5.903505686 | 0.001878873 |
| AL358075.4      | -5.932329002 | 0.016343631 |
| AC040977.2      | -5.938770635 | 0.031429361 |
| C1orf127        | -5.949493363 | 0.00116072  |
| LINC01776       | -5.982317759 | 0.007979737 |
| SOC5P4          | -5.986183542 | 0.000982259 |
| AC091100.1      | -6.03625251  | 0.006693387 |
| UBASH3A         | -6.040382562 | 0.001252443 |
| LRRC32          | -6.049424518 | 0.001188898 |
| LINC01979       | -6.256732681 | 0.000298783 |
| FBXO15          | -6.259869392 | 0.000498043 |
| AC008734.1      | -6.299828334 | 0.000220047 |
| AL109955.1      | -6.325829637 | 0.000276434 |
| AC092159.2      | -6.386541522 | 0.000144218 |
| AL355987.3      | -6.406488001 | 1.07E-05    |
| DAB1            | -6.410107056 | 0.012746148 |
| F2RL2           | -6.423444101 | 0.000220799 |
| AL683813.1      | -6.451225861 | 0.000154939 |
| AC233702.10     | -6.502204361 | 0.001821716 |
| AL139300.1      | -6.515040698 | 0.010266159 |
| ADAM32          | -6.692552804 | 4.47E-05    |
| AC114755.5      | -6.707682068 | 2.80E-05    |
| AS3MT           | -8.577988993 | 7.11E-11    |
| ATP6V1G2-DDX39B | -9.219874354 | 0.012161272 |
| AL158151.1      | -12.231728   | 1.44E-24    |
| TNXA            | -22.06287811 | 1.65E-08    |

|              |              |          |
|--------------|--------------|----------|
| AC027682.3   | -22.86762953 | 4.86E-09 |
| FP565260.2   | -22.96935839 | 4.15E-09 |
| AC092849.1   | -23.98447524 | 8.33E-10 |
| DNAAF4-CCPG1 | -24.64244874 | 2.84E-10 |
