# Supplementary material for: LncRNA SNHG17 Contributes to Proliferation, Migration, and Poor Prognosis of Hepatocellular Carcinoma
Source: Hindawi journal article supplement (doi:10.1155/2021/9990338), 2021-01-01
Supplement: f1 [file 9990338.f1.zip]

| <b>SNHG17 positive-related genes in TCGA</b> | <b>Downregulated genes in RNA-seq data</b> | <b>Overlap</b> |
|----------------------------------------------|--------------------------------------------|----------------|
| ZYX                                          | ZBED3-AS1                                  | ADAM9          |
| ZXDC                                         | ALDH3A2                                    | DMBT1          |
| ZWINT                                        | GCGR                                       | ZNF296         |
| ZWILCH                                       | HPD                                        | NOL4L          |
| ZW10                                         | ST6GALNAC6                                 | NEK6           |
| ZUP1                                         | MAB21L3                                    | CCDC51         |
| ZSWIM9                                       | ADAM9                                      | CYSRT1         |
| ZSWIM7                                       | SLC1A3                                     | NSF            |
| ZSWIM5                                       | MAN2A1                                     | NOL9           |
| ZSWIM4                                       | MYEOV                                      | ANKRD34A       |
| ZSWIM3                                       | DMBT1                                      | INPP4A         |
| ZSWIM1                                       | AC010733.2                                 | C1orf116       |
| ZSCAN9                                       | EVI2B                                      | LIMS1          |
| ZSCAN5C                                      | AC121761.1                                 | UBASH3B        |
| ZSCAN5A                                      | AC104447.1                                 | ARMC10         |
| ZSCAN31                                      | ZNF296                                     | FAM89A         |
| ZSCAN30                                      | NOL4L                                      | GXYLT2         |
| ZSCAN29                                      | IQCH                                       | ACE            |
| ZSCAN26                                      | NEK6                                       | NANOS1         |
| ZSCAN25                                      | CCND1                                      | LRGUK          |
| ZSCAN22                                      | AC017083.4                                 | PITX3          |
| ZSCAN20                                      | TSSK5P                                     | SPDYE3         |
| ZSCAN2                                       | MAMDC2                                     | RHPN1          |
| ZSCAN16                                      | AVIL                                       | SAPCD1         |
| ZSCAN12                                      | AC245041.1                                 | P2RY11         |
| ZRSR2                                        | CCDC51                                     | SOCS1          |
| ZRANB2                                       | DDX60                                      | CMTM4          |
| ZPR1                                         | AC127496.7                                 | TMEM63C        |
| ZP3                                          | AL513302.2                                 | ASNS           |
| ZP1                                          | ADGRG3                                     | GRIN3B         |
| ZNRF1                                        | RN7SL1                                     | HMGA2          |
| ZNRD2                                        | CYSRT1                                     | HTR1D          |
| ZNRD1                                        | LINC01679                                  | FAM71E1        |
| ZNHIT6                                       | NSF                                        | SSC4D          |
| ZNHIT3                                       | AL513497.1                                 | ASPHD2         |
| ZNHIT2                                       | AL132655.2                                 | ZHX1-C8orf76   |
| ZNHIT1                                       | NOL9                                       | CLIC3          |
| ZNF93                                        | RIPOR2                                     | RSPH4A         |
| ZNF92                                        | ABCC3                                      | PRELID2        |
| ZNF91                                        | SUSD2                                      | SIRT4          |
| ZNF90                                        | OASL                                       | SLC12A5        |
| ZNF891                                       | PRSS36                                     | GSDMB          |

|         |            |            |
|---------|------------|------------|
| ZNF888  | TNS4       | G6PD       |
| ZNF880  | CCL5       | DDIAS      |
| ZNF878  | NNAT       | STMN3      |
| ZNF875  | USP32P3    | PHC1       |
| ZNF865  | AC104825.2 | GLI1       |
| ZNF862  | SRD5A3-AS1 | SCO2       |
| ZNF853  | ANKRD34A   | SLC4A8     |
| ZNF852  | TINAGL1    | KCNH2      |
| ZNF850  | INPP4A     | CD7        |
| ZNF85   | FRGCA      | ANKRD2     |
| ZNF846  | C1orf116   | NHLH1      |
| ZNF841  | TJP3       | LCTL       |
| ZNF84   | LIMS1      | ERH        |
| ZNF836  | LINC01128  | HOXA2      |
| ZNF830  | UBASH3B    | APOBR      |
| ZNF83   | INHBB      | ROBO1      |
| ZNF823  | MMRN2      | TBCA       |
| ZNF821  | ARMC10     | KCNK9      |
| ZNF814  | FAM89A     | KCTD19     |
| ZNF813  | AC097461.1 | CPA2       |
| ZNF8    | GXYLT2     | OXTR       |
| ZNF799  | MLXIPL     | CFAP43     |
| ZNF793  | VLDLR      | ATP6V1C2   |
| ZNF792  | ACE        | TAS2R19    |
| ZNF791  | GALNT4     | ERVMER34-1 |
| ZNF79   | AC005586.2 | ALG1L2     |
| ZNF789  | CYP1A1     | SCG3       |
| ZNF787  | SNX18P7    | PRR35      |
| ZNF786  | NANOS1     | PSAPL1     |
| ZNF785  | LRGUK      | C1orf127   |
| ZNF784  | PITX3      | ADAM32     |
| ZNF783  | CFAP54     |            |
| ZNF782  | SPDYE3     |            |
| ZNF780B | DAPP1      |            |
| ZNF780A | CALM2P2    |            |
| ZNF778  | RHPN1      |            |
| ZNF777  | AL451042.2 |            |
| ZNF775  | AP002387.1 |            |
| ZNF774  | SAPCD1     |            |
| ZNF773  | AC092134.1 |            |
| ZNF771  | P2RY11     |            |
| ZNF77   | AC010442.2 |            |
| ZNF768  | RARRES3    |            |
| ZNF766  | AL096870.2 |            |

|                       |             |
|-----------------------|-------------|
| ZNF765                | UGT1A7      |
| ZNF764                | EPHB4       |
| ZNF763                | AC105285.1  |
| ZNF761; ZNF765-ZNF761 | SAMD8       |
| ZNF76                 | AL603750.1  |
| ZNF75A                | AC093525.6  |
| ZNF749                | PPM1J       |
| ZNF747                | CACNG6      |
| ZNF746                | AC040162.1  |
| ZNF740                | SOCS1       |
| ZNF74                 | PXK         |
| ZNF738                | AC084876.1  |
| ZNF736                | CMTM4       |
| ZNF732                | LINC01759   |
| ZNF730                | PECAM1      |
| ZNF724                | LINC00570   |
| ZNF721                | PPM1E       |
| ZNF718                | POLN        |
| ZNF714                | TMEM63C     |
| ZNF713                | SERPINB7    |
| ZNF711                | KDM1B       |
| ZNF710                | ATP2A2      |
| ZNF71                 | AC020978.10 |
| ZNF709                | AC005034.3  |
| ZNF708                | KLHL30      |
| ZNF707                | AP003469.4  |
| ZNF706                | LMO4        |
| ZNF704                | FLJ31104    |
| ZNF703                | AC234582.1  |
| ZNF701                | SRMS        |
| ZNF700                | ASNS        |
| ZNF70                 | GRIN3B      |
| ZNF7                  | SLC12A3     |
| ZNF696                | GACAT2      |
| ZNF695                | HMGA2       |
| ZNF692                | RNA5-8SN4   |
| ZNF691                | EXOC3L4     |
| ZNF687                | HTR1D       |
| ZNF682                | FBXO36      |
| ZNF681                | HSPB6       |
| ZNF678                | AC080038.3  |
| ZNF675                | AKR1B15     |
| ZNF672                | FAM71E1     |
| ZNF669                | RNF38       |

|         |              |
|---------|--------------|
| ZNF668  | BTBD19       |
| ZNF665  | FAM86C2P     |
| ZNF664  | SEMA3G       |
| ZNF660  | SSC4D        |
| ZNF66   | RNA5-8SN1    |
| ZNF655  | ASPHD2       |
| ZNF653  | NONOP2       |
| ZNF652  | AC005034.5   |
| ZNF646  | CLDN4        |
| ZNF641  | HCG25        |
| ZNF639  | AL358790.1   |
| ZNF638  | ZHX1-C8orf76 |
| ZNF629  | CLIC3        |
| ZNF628  | GARNL3       |
| ZNF627  | RNA5-8SN5    |
| ZNF624  | ENTPD7       |
| ZNF623  | RSPH4A       |
| ZNF622  | VWCE         |
| ZNF621  | A2M          |
| ZNF620  | C20orf196    |
| ZNF618  | CCNG1        |
| ZNF614  | PRELID2      |
| ZNF613  | PHOSPHO1     |
| ZNF610  | BASP1        |
| ZNF607  | SIRT4        |
| ZNF606  | TRIM22       |
| ZNF605  | DNAAF3       |
| ZNF600  | AC005324.5   |
| ZNF599  | SLC12A5      |
| ZNF598  | DDAH1        |
| ZNF594  | AC006262.2   |
| ZNF593  | MIR22HG      |
| ZNF592  | AC089983.1   |
| ZNF589  | LINC00920    |
| ZNF587B | CCL22        |
| ZNF587  | DGCR9        |
| ZNF586  | CLDN9        |
| ZNF584  | AL023284.4   |
| ZNF581  | AC004520.1   |
| ZNF580  | AC090510.1   |
| ZNF579  | AKR1C1       |
| ZNF577  | GGT5         |
| ZNF576  | MERTK        |
| ZNF574  | GSTM2        |

|               |               |
|---------------|---------------|
| ZNF573        | AL035413.2    |
| ZNF572        | AC139795.2    |
| ZNF571        | GFM2          |
| ZNF570        | GSDMB         |
| ZNF57         | AP005264.1    |
| ZNF567        | SNHG17        |
| ZNF566        | TPP1          |
| ZNF565        | BORCS8-MEF2B  |
| ZNF562        | TOMM6         |
| ZNF561        | GBP4          |
| ZNF559-ZNF177 | LINC01970     |
| ZNF559        | G6PD          |
| ZNF557        | TMEM52        |
| ZNF556        | AC018629.1    |
| ZNF555        | SLC25A23      |
| ZNF554        | DDIAS         |
| ZNF552        | EFCAB12       |
| ZNF551        | STMN3         |
| ZNF550        | AC097662.1    |
| ZNF548        | ACE2          |
| ZNF547        | PHC1          |
| ZNF546        | GLI1          |
| ZNF544        | TMEM171       |
| ZNF543        | TMIE          |
| ZNF532        | AC116366.1    |
| ZNF530        | AC105052.1    |
| ZNF529        | FLJ22447      |
| ZNF527        | EXTL3-AS1     |
| ZNF526        | NDUFC2-KCTD14 |
| ZNF525        | CARNMT1       |
| ZNF524        | SCO2          |
| ZNF519        | AC007114.1    |
| ZNF518A       | AC007161.3    |
| ZNF517        | SLC4A8        |
| ZNF516        | SOCS2-AS1     |
| ZNF514        | HIST1H4C      |
| ZNF513        | AMY2B         |
| ZNF512B       | CLSTN2        |
| ZNF512        | CDH1          |
| ZNF511        | KRT87P        |
| ZNF507        | KCNH2         |
| ZNF506        | RASA4CP       |
| ZNF503        | AC007238.1    |
| ZNF500        | AL669918.1    |

|         |             |
|---------|-------------|
| ZNF496  | NFAM1       |
| ZNF488  | LINC02361   |
| ZNF487  | ACSM5       |
| ZNF485  | PCAT6       |
| ZNF480  | CD7         |
| ZNF48   | HNRNPA1P49  |
| ZNF473  | C1orf220    |
| ZNF467  | AP002336.2  |
| ZNF461  | KLRG1       |
| ZNF451  | ANKRD2      |
| ZNF45   | CTRB2       |
| ZNF449  | AC020978.8  |
| ZNF446  | AL355802.3  |
| ZNF445  | AC017074.1  |
| ZNF444  | ZNF571-AS1  |
| ZNF443  | AKR1C2      |
| ZNF442  | AC007192.2  |
| ZNF440  | NHLH1       |
| ZNF44   | MILR1       |
| ZNF439  | LCTL        |
| ZNF438  | ERH         |
| ZNF436  | AC022400.3  |
| ZNF433  | HOXA2       |
| ZNF432  | APOBR       |
| ZNF431  | AC023043.2  |
| ZNF430  | AL359922.1  |
| ZNF43   | PLA2G4B     |
| ZNF428  | RN7SK       |
| ZNF426  | RRAD        |
| ZNF420  | C1orf228    |
| ZNF419  | MIR31HG     |
| ZNF416  | AC087392.3  |
| ZNF414  | ROBO1       |
| ZNF408  | AP001148.1  |
| ZNF404  | AC013643.3  |
| ZNF398  | TBCA        |
| ZNF397  | AL390066.1  |
| ZNF394  | AC006486.1  |
| ZNF391  | AVPR2       |
| ZNF385C | TTC28-AS1_2 |
| ZNF385A | KCNK9       |
| ZNF383  | CA14        |
| ZNF382  | KCTD19      |
| ZNF37A  | CPA2        |

|         |            |
|---------|------------|
| ZNF362  | AP000777.3 |
| ZNF358  | IFNWP19    |
| ZNF354B | AP001160.2 |
| ZNF354A | OXTR       |
| ZNF350  | AC080162.1 |
| ZNF35   | GABRR2     |
| ZNF346  | LGALS9B    |
| ZNF345  | FER1L4     |
| ZNF343  | CFAP43     |
| ZNF341  | AC012377.1 |
| ZNF34   | AC100827.3 |
| ZNF33B  | GJA5       |
| ZNF33A  | CLCA2      |
| ZNF337  | ALG1L7P    |
| ZNF335  | ELOCP19    |
| ZNF333  | AL161937.2 |
| ZNF329  | BCRP7      |
| ZNF324B | LINC01219  |
| ZNF324  | CYP4F3     |
| ZNF320  | MIR3074    |
| ZNF32   | TUBA8      |
| ZNF319  | AC011445.1 |
| ZNF318  | AC073610.1 |
| ZNF317  | LINC02280  |
| ZNF316  | SNORD22    |
| ZNF304  | TSPAN6     |
| ZNF302  | ATP6V1C2   |
| ZNF300  | USP12-AS2  |
| ZNF30   | RPS20P21   |
| ZNF3    | MIR34AHG   |
| ZNF296  | AC084337.2 |
| ZNF292  | AL691442.1 |
| ZNF286B | C1QTNF4    |
| ZNF286A | SLC23A3    |
| ZNF285  | MIR137     |
| ZNF284  | KRT8P45    |
| ZNF283  | AC027307.3 |
| ZNF282  | AC087632.1 |
| ZNF280C | CAPN3      |
| ZNF280B | CD226      |
| ZNF280A | AC020907.4 |
| ZNF276  | Z98884.2   |
| ZNF273  | CYP4F11    |
| ZNF267  | PKN2-AS1   |

|                       |            |
|-----------------------|------------|
| ZNF266                | AC020634.1 |
| ZNF263                | AL512274.1 |
| ZNF260                | FGF7P3     |
| ZNF26                 | PKP4-AS1   |
| ZNF256                | MICD       |
| ZNF253                | SLC47A1P1  |
| ZNF251                | AC141557.1 |
| ZNF250                | AC126182.2 |
| ZNF248                | LINC01376  |
| ZNF239                | HIST1H3J   |
| ZNF235                | AC090695.1 |
| ZNF234                | AC073487.1 |
| ZNF233                | UBE2L5P    |
| ZNF232                | AC005041.1 |
| ZNF230                | AC067968.1 |
| ZNF227                | RFPL3S     |
| ZNF226                | PCDHGA12   |
| ZNF225                | AL583722.4 |
| ZNF224                | AC008013.1 |
| ZNF223                | TAS2R19    |
| ZNF222                | NOS2P3     |
| ZNF22                 | AL627389.1 |
| ZNF219                | TCTE1      |
| ZNF213                | AL353719.1 |
| ZNF212                | AC004461.2 |
| ZNF211                | GKN2       |
| ZNF207                | CYCSP10    |
| ZNF205                | RPSAP13    |
| ZNF202                | ZFP57      |
| ZNF200                | ABCA9      |
| ZNF20                 | AC007272.1 |
| ZNF2                  | AC064807.2 |
| ZNF197; ZNF660-ZNF197 | ERVMER34-1 |
| ZNF195                | ALG1L2     |
| ZNF19                 | AL583810.1 |
| ZNF189                | AL138995.1 |
| ZNF185                | DCDC1      |
| ZNF184                | LMO2       |
| ZNF182                | AC011498.5 |
| ZNF180                | TXNP6      |
| ZNF174                | AL121894.2 |
| ZNF17                 | SNORA18    |
| ZNF169                | AC026954.2 |
| ZNF165                | AP001266.2 |



|              |             |
|--------------|-------------|
| ZNF16        | AC005618.1  |
| ZNF146       | GYG2        |
| ZNF143       | AP001025.1  |
| ZNF142       | APOBEC3A    |
| ZNF14        | LINC00221   |
| ZNF138       | AC118658.2  |
| ZNF134       | ARL11       |
| ZNF133       | KRTAP5-2    |
| ZNF131       | ANO5        |
| ZNF124       | AL355922.3  |
| ZNF121       | AC073326.1  |
| ZNF12        | C3orf20     |
| ZNF114       | AC046134.1  |
| ZNF112       | AC063944.1  |
| ZNF107       | AL162456.1  |
| ZNF101       | AL590302.2  |
| ZNF100       | PRG2        |
| ZNF10        | SCG3        |
| ZMYND8       | AC127496.5  |
| ZMYND19      | AC132938.5  |
| ZMYND10      | WDR72       |
| ZMYM6        | PRR35       |
| ZMYM5        | P2RX6P      |
| ZMYM3        | MIRLET7I    |
| ZMYM2        | PSAPL1      |
| ZMIZ2        | AC087385.1  |
| ZMIZ1        | AL158835.3  |
| ZMAT5        | ITGA11      |
| ZMAT4        | AC010503.2  |
| ZMAT2        | AL158071.4  |
| ZKSCAN8      | AL121839.2  |
| ZKSCAN5      | AC107067.1  |
| ZKSCAN4      | KLHDC1      |
| ZKSCAN3      | LINC00441   |
| ZIC5         | AC244033.1  |
| ZIC2         | CORO2B      |
| ZHX2         | OR1F12      |
| ZHX1-C8orf76 | TMX2-CTNND1 |
| ZGRF1        | SCTR        |
| ZGLP1        | ST8SIA6-AS1 |
| ZG16B        | AL031731.1  |
| ZFYVE27      | AC241644.3  |
| ZFYVE26      | TXNRD3NB    |
| ZFYVE19      | AC007663.1  |

|          |                 |
|----------|-----------------|
| ZFR      | AC099336.1      |
| ZFPL1    | PRAP1           |
| ZFP90    | MGARP           |
| ZFP82    | FCN2            |
| ZFP69B   | AC138356.1      |
| ZFP69    | NPC1L1          |
| ZFP64    | TTLL13P         |
| ZFP62    | MYO16-AS1       |
| ZFP41    | AL365226.1      |
| ZFP36L2  | AC244034.3      |
| ZFP14    | PSPC1P1         |
| ZFHX2    | AC018616.1      |
| ZFC3H1   | AC105339.2      |
| ZFAT     | CELF6           |
| ZFAND3   | AGAP11          |
| ZFAND2B  | AL358075.4      |
| ZFAND2A  | AC040977.2      |
| ZFAND1   | C1orf127        |
| ZER1     | LINC01776       |
| ZDHHC9   | SOCS5P4         |
| ZDHHC7   | AC091100.1      |
| ZDHHC6   | UBASH3A         |
| ZDHHC5   | LRRC32          |
| ZDHHC4   | LINC01979       |
| ZDHHC3   | FBXO15          |
| ZDHHC24  | AC008734.1      |
| ZDHHC18  | AL109955.1      |
| ZDHHC17  | AC092159.2      |
| ZDHHC16  | AL355987.3      |
| ZDHHC14  | DAB1            |
| ZDHHC13  | F2RL2           |
| ZDHHC12  | AL683813.1      |
| ZDHHC1   | AC233702.10     |
| ZCRB1    | AL139300.1      |
| ZCCHC9   | ADAM32          |
| ZCCHC8   | AC114755.5      |
| ZCCHC7   | AS3MT           |
| ZCCHC4   | ATP6V1G2-DDX39B |
| ZCCHC3   | AL158151.1      |
| ZCCHC17  | TNXA            |
| ZCCHC12  | AC027682.3      |
| ZCCHC10  | FP565260.2      |
| ZC3HC1   | AC092849.1      |
| ZC3HAV1L | DNAAF4-CCPG1    |

ZC3H8  
ZC3H4  
ZC3H3  
ZC3H18  
ZC3H15  
ZC3H12B  
ZC3H11A  
ZC3H10  
ZC2HC1A  
ZBTB9  
ZBTB8OS  
ZBTB8B  
ZBTB7A  
ZBTB5  
ZBTB49  
ZBTB48  
ZBTB46  
ZBTB45  
ZBTB41  
ZBTB40  
ZBTB34  
ZBTB32  
ZBTB3  
ZBTB26  
ZBTB24  
ZBTB22  
ZBTB2  
ZBTB17  
ZBTB12  
ZBTB11  
ZBED8  
ZBED6CL  
ZBED5  
ZBED4  
ZBED2  
ZBBX  
ZAR1L  
ZACN  
YY1AP1  
YY1  
YWHAZ  
YWHAQ  
YWHAH  
YWHAG

YWHAE  
YWHAB  
YTHDF2  
YTHDF1  
YTHDC1  
YRDC  
YPEL5  
YPEL4  
YPEL3  
YOD1  
YKT6  
YJU2  
YJEFN3  
YIPF7  
YIPF4  
YIPF3  
YIPF2  
YIPF1  
YIF1B  
YIF1A  
YEATS4  
YEATS2  
YDJC  
YBX3  
YBX1  
YBEY  
YARS2  
YARS1  
YAE1  
XYLT2  
XXYLT1  
XRN2  
XRCC6  
XRCC5  
XRCC4  
XRCC3  
XRCC2  
XRCC1  
XPR1  
XPOT  
XPO7  
XPO6  
XPO5  
XPO4

XPO1  
XPNPEP1  
XPA  
XIRP1  
XCL1  
XAB2  
WWP2  
WWC3  
WWC1  
WTIP  
WTAP  
WSCD1  
WSB2  
WSB1  
WRNIP1  
WRAP73  
WRAP53  
WNT6  
WNT3A  
WNT2B  
WNT10B  
WNT10A  
WNK4  
WNK2  
WIZ  
WIP1  
WIPF2  
WIF1  
WHRN  
WHAMM  
WFS1  
WFDC3  
WFDC13  
WFDC10A  
WDYHV1  
WDSUB1  
WDR97  
WDR93  
WDR92  
WDR91  
WDR90  
WDR89  
WDR88  
WDR87

WDR83OS

WDR83

WDR82

WDR77

WDR76

WDR75

WDR74

WDR73

WDR70

WDR62

WDR61

WDR60

WDR6

WDR5B

WDR55

WDR54

WDR53

WDR5

WDR48

WDR46

WDR45B

WDR45

WDR43

WDR41

WDR4

WDR38

WDR37

WDR35

WDR34

WDR33

WDR3

WDR27

WDR26

WDR25

WDR18

WDR13

WDR12

WDR1

WDHD1

WDFY2

WDCP

WBP2NL

WBP2

WBP11

WBP1  
WASHC5  
WASHC2C  
WASHC2A  
WASHC1  
WASF2  
WASF1  
WARS2  
WARS1  
WAPL  
WAC  
VWA5B2  
VWA1  
VTI1A  
VSX2  
VSX1  
VSTM5  
VSIG8  
VSIG10L  
VSIG10  
VSIG1  
VRTN  
VRK1  
VPS9D1  
VPS8  
VPS72  
VPS54  
VPS53  
VPS51  
VPS50  
VPS4A  
VPS45  
VPS41  
VPS39  
VPS37C  
VPS37B  
VPS35  
VPS33B  
VPS33A  
VPS29  
VPS28  
VPS26A  
VPS25  
VPS18

VPS16  
VPS13B  
VPS11  
VOPP1  
VN1R5  
VN1R1  
VMP1  
VMAC  
VMA21  
VKORC1L1  
VIRMA  
VIPAS39  
VIM  
VILL  
VIL1  
VHL  
VGF  
VEZT  
VEZF1  
VENTX  
VEGFB  
VEGFA  
VDR  
VDAC3  
VDAC2  
VDAC1  
VCPKMT  
VCP  
VCL  
VBP1  
VAX2  
VAV3  
VAT1  
VASP  
VASH1  
VAR2  
VAR1  
VAPB  
VAPA  
VANGL2  
VANGL1  
VAMP8  
VAMP5  
VAMP4



VAC14  
UXT  
UXS1  
UVSSA  
UTS2  
UTRN  
UTP6  
UTP4  
UTP3  
UTP25  
UTP23  
UTP20  
UTP18  
UTP15  
UTP14A  
UTP11  
UTF1  
USP6  
USP54  
USP5  
USP49  
USP48  
USP46  
USP42  
USP40  
USP39  
USP36  
USP35  
USP3  
USP27X  
USP24  
USP22  
USP21  
USP20  
USP19  
USP14  
USP11  
USP1  
USH1G  
USF2  
USF1  
USE1  
USB1  
UROS

UROD  
URM1  
URI1  
URGCP  
URB2  
URB1  
URAD  
UQCRHL  
UQCRH  
UQCRFS1  
UQCRC1  
UQCRB  
UQCR11  
UQCR10  
UQCC3  
UQCC2  
UQCC1  
UPP1  
UPK3A  
UPK2  
UPK1A  
UPF3B  
UPF3A  
UPF2  
UPF1  
UNK  
UNG  
UNC93B1  
UNC5CL  
UNC5A  
UNC50  
UNC45A  
UNC13D  
UNC13A  
UNC119B  
UNC119  
UMPS  
UMODL1  
ULK3  
ULK1  
ULBP1  
UIMC1  
UHRF2  
UHRF1BP1

UHRF1  
UGT8  
UGGT2  
UGGT1  
UGCG  
UFSP1  
UFD1  
UFC1  
UCP3  
UCP2  
UCP1  
UCN2  
UCN  
UCKL1  
UCK2  
UCK1  
UCHL5  
UCHL3  
UCHL1  
UBXN7  
UBXN6  
UBXN2A  
UBXN11  
UBXN1  
UBTF  
UBTD2  
UBTD1  
UBR5  
UBQLN4  
UBP1  
UBOX5  
UBN2  
UBN1  
UBLCP1  
UBL7  
UBL5  
UBL4A  
UBIAD1  
UBFD1  
UBE3D  
UBE3B  
UBE2Z  
UBE2W  
UBE2V2

UBE2T  
UBE2S  
UBE2R2  
UBE2Q2L  
UBE2Q2  
UBE2Q1  
UBE2O  
UBE2N  
UBE2M  
UBE2L5  
UBE2L3  
UBE2K  
UBE2J2  
UBE2J1  
UBE2I  
UBE2H  
UBE2G2  
UBE2F  
UBE2E3  
UBE2E1  
UBE2D2  
UBE2D1  
UBE2C  
UBE2B  
UBE2A  
UBD  
UBASH3B  
UBAP2L  
UBAP2  
UBAP1  
UBALD2  
UBAC2  
UBAC1  
UBA52  
UBA5  
UBA3  
UBA2  
UBA1  
UAP1L1  
U2SURP  
U2AF2  
U2AF1L4  
TYW5  
TYW3

TYW1  
TYSND1  
TYROBP  
TYRO3  
TYMSOS  
TYMS  
TYK2  
TXNRD2  
TXNRD1  
TXNL4B  
TXNL4A  
TXNL1  
TXNDC9  
TXNDC2  
TXNDC17  
TXNDC12  
TXN2  
TXN  
TXLNG  
TXLNA  
TWNK  
TWISTNB  
TWIST1  
TWF2  
TVP23C  
TVP23A  
TUT1  
TUSC2  
TULP4  
TULP3  
TULP1  
TUFT1  
TUFM  
TUBGCP6  
TUBGCP2  
TUBG2  
TUBG1  
TUBD1  
TUBB8  
TUBB6  
TUBB4B  
TUBB3  
TUBB2B  
TUBB2A

TUBB  
TUBA1C  
TUBA1B  
TUBA1A  
TTYH3  
TTYH2  
TTYH1  
TTLL9  
TTLL6  
TTLL5  
TTLL4  
TTLL3  
TTLL12  
TTLL11  
TTLL1  
TTL  
TTK  
TTI1  
TTF2  
TTF1  
TTC9C  
TTC9B  
TTC5  
TTC4  
TTC39A  
TTC34  
TTC32  
TTC3  
TTC29  
TTC27  
TTC26  
TTC23L  
TTC21B  
TTC21A  
TTC13  
TTC1  
TSTD3  
TSTA3  
TSSK6  
TSSC4  
TSR3  
TSR2  
TSR1  
TSPYL2

TSPOAP1  
TSPO2  
TSPO  
TSPAN4  
TSPAN3  
TSPAN19  
TSPAN17  
TSPAN15  
TSPAN14  
TSPAN10  
TSNAX  
TSNARE1  
TSN  
TSGA10IP  
TSGA10  
TSG101  
TSFM  
TSEN54  
TSEN34  
TSEN2  
TSEN15  
TSC22D4  
TSC1  
TSACC  
TRUB2  
TRRAP  
TRPV2  
TRPT1  
TRPM5  
TRPM4  
TRPM2  
TRPC7  
TRPC4AP  
TRPC1  
TROAP  
TRNT1  
TRNP1  
TRNAU1AP  
TRMU  
TRMT61A  
TRMT6  
TRMT5  
TRMT44  
TRMT2B

TRMT2A  
TRMT13  
TRMT12  
TRMT112  
TRMT10C  
TRMT10B  
TRMT1  
TRMO  
TRIT1  
TRIR  
TRIP6  
TRIP4  
TRIP13  
TRIP12  
TRIP10  
TRIOBP  
TRIO  
TRIM8  
TRIM72  
TRIM71  
TRIM7  
TRIM67  
TRIM65  
TRIM6  
TRIM59  
TRIM56  
TRIM54  
TRIM52  
TRIM50  
TRIM47  
TRIM46  
TRIM45  
TRIM41  
TRIM39-RPP21; RPP21  
TRIM39  
TRIM37  
TRIM33  
TRIM32  
TRIM31  
TRIM3  
TRIM28  
TRIM27  
TRIM25  
TRIM24



TRIM17  
TRIM16L  
TRIM16  
TRIM13  
TRIM11  
TRIB3  
TRIAP1  
TREX2  
TREM2  
TREM1  
TRDMT1  
TRAPPC9  
TRAPPC6A  
TRAPPC5  
TRAPPC4  
TRAPPC3  
TRAPPC2L  
TRAPPC2B  
TRAPPC2  
TRAPPC12  
TRAPPC1  
TRAM1L1  
TRAM1  
TRAK2  
TRAK1  
TRAIP  
TRAFD1  
TRAF7  
TRAF5  
TRAF4  
TRAF3  
TRAF2  
TRAF1  
TRADD  
TRABD  
TRA2B  
TRA2A  
TPX2  
TPT1  
TPRN  
TPRKB  
TPRA1  
TPR  
TPPP3

TPM4  
TPM3  
TPM2  
TPM1  
TPI1  
TPH1  
TPGS2  
TPGS1  
TPD52L2  
TPD52  
TPCN1  
TPBGL  
TP53TG5  
TP53RK  
TP53I3  
TP53I13  
TP53I11  
TP53BP2  
TP53  
TOX4  
TOR4A  
TOR3A  
TOR2A  
TOPBP1  
TOP3A  
TOP2B  
TOP2A  
TOP1MT  
TONSL  
TOMM70  
TOMM7  
TOMM5  
TOMM40L  
TOMM40  
TOMM34  
TOMM22  
TOMM20L  
TOMM20  
TOM1L2  
TOM1  
TOGARAM2  
TOE1  
TNRC18  
TNPO3

TNPO2  
TNPO1  
TNP1  
TNNT2  
TNNT1  
TNNI3  
TNNI2  
TNNC1  
TNK2  
TNIP2  
TNIP1  
TNFSF9  
TNFSF4  
TNFSF15  
TNFRSF9  
TNFRSF8  
TNFRSF4  
TNFRSF25  
TNFRSF21  
TNFRSF18  
TNFRSF14  
TNFRSF13C  
TNFRSF12A  
TNFRSF11A  
TNFRSF10C  
TNFAIP8L3  
TNFAIP8L2-SCNM1; SCNM1  
TNFAIP8  
TNFAIP6  
TMX3  
TMX2  
TMUB2  
TMUB1  
TMSB4X  
TMSB15B  
TMSB15B  
TMSB15A  
TMSB10  
TMPRSS7  
TMPRSS5  
TMPO  
TMIGD1  
TMEM9B  
TMEM99

TMEM98  
TMEM94  
TMEM91  
TMEM9  
TMEM8B  
TMEM89  
TMEM88B  
TMEM87B  
TMEM87A  
TMEM81  
TMEM80  
TMEM79  
TMEM74B  
TMEM70  
TMEM69  
TMEM68  
TMEM67  
TMEM65  
TMEM63C  
TMEM63B  
TMEM63A  
TMEM62  
TMEM61  
TMEM60  
TMEM54  
TMEM52B  
TMEM51  
TMEM50B  
TMEM50A  
TMEM44  
TMEM43  
TMEM42  
TMEM41B  
TMEM41A  
TMEM39B  
TMEM39A  
TMEM38B  
TMEM31  
TMEM272  
TMEM268  
TMEM267  
TMEM266  
TMEM263  
TMEM262

TMEM260  
TMEM259  
TMEM258  
TMEM256  
TMEM253  
TMEM251  
TMEM250  
TMEM249  
TMEM248  
TMEM243  
TMEM241  
TMEM240  
TMEM237  
TMEM236  
TMEM234  
TMEM230  
TMEM225B  
TMEM223  
TMEM222  
TMEM219  
TMEM218  
TMEM216  
TMEM214  
TMEM213  
TMEM209  
TMEM208  
TMEM203  
TMEM201  
TMEM199  
TMEM198  
TMEM191C  
TMEM191B  
TMEM190  
TMEM189  
TMEM186  
TMEM185B  
TMEM185A  
TMEM184B  
TMEM183A  
TMEM182  
TMEM181  
TMEM18  
TMEM179B  
TMEM178A

TMEM177  
TMEM17  
TMEM168  
TMEM167B  
TMEM167A  
TMEM165  
TMEM164  
TMEM161A  
TMEM160  
TMEM158  
TMEM155  
TMEM151B  
TMEM151A  
TMEM150A  
TMEM14C  
TMEM14B  
TMEM147  
TMEM145  
TMEM141  
TMEM138  
TMEM134  
TMEM132A  
TMEM128  
TMEM127  
TMEM126B  
TMEM126A  
TMEM121B  
TMEM120B  
TMEM120A  
TMEM117  
TMEM116  
TMEM115  
TMEM11  
TMEM109  
TMEM108  
TMEM107  
TMEM106C  
TMEM104  
TMEM102  
TMEM101  
TMEFF1  
TMED9  
TMED4  
TMED3

TMED2  
TMED1  
TMCO3  
TMCO1  
TMCC2  
TMC7  
TMC6  
TMC5  
TMC2  
TMBIM4  
TMBIM1  
TMA7  
TMA16  
TM9SF4  
TM9SF3  
TM9SF1  
TM4SF19  
TM4SF1  
TM2D1  
TLX2  
TLR9  
TLNRD1  
TLL2  
TLK2  
TLK1  
TLE5  
TLE3  
TLE1  
TLDC2  
TLCD5  
TLCD3B  
TLCD3A  
TLCD1  
TKTL2  
TKT  
TK1  
TJAP1  
TIPRL  
TIPIN  
TINF2  
TINAG  
TIMMDC1  
TIMM9  
TIMM8B

TIMM8A  
TIMM50  
TIMM44  
TIMM29  
TIMM23  
TIMM22  
TIMM21  
TIMM17B  
TIMM17A  
TIMM13  
TIMM10B  
TIMM10  
TIMELESS  
TIGD7  
TIGD6  
TIGD5  
TIGD3  
TIGD1  
TIGAR  
TICRR  
TIAM2  
TIAL1  
TIA1  
THYN1  
THY1  
THUMPD3  
THUMPD2  
THOP1  
THOC7  
THOC6  
THOC5  
THOC3  
THOC2  
THOC1  
THG1L  
THEM6  
THEM5  
THEM4  
THBS3  
THAP8  
THAP7  
THAP4  
THAP3  
THAP2



THAP12  
THAP11  
THADA  
TGS1  
TGM4  
TGM3  
TGM1  
TGIF2  
TGIF1  
TGFBRAP1  
TGFB1  
TGFB2  
TGFB1  
TFRC  
TFPT  
TFG  
TFF3  
TFEB  
TFE3  
TFDP2  
TFDP1  
TFCP2L1  
TFCP2  
TFB2M  
TFAP4  
TFAP2E  
TFAP2B  
TFAP2A  
TFAM  
TEX48  
TEX46  
TEX45  
TEX38  
TEX29  
TEX264  
TEX261  
TEX22  
TEX19  
TEX10  
TET3  
TET1  
TESMIN  
TESK1  
TESC

TES  
TERT  
TERF2IP  
TERF2  
TERF1  
TERB1  
TEPSIN  
TENT5B  
TENT4A  
TELO2  
TEKT4  
TEKT3  
TEKT2  
TEFM  
TEDC2  
TEDC1  
TECR  
TECPR1  
TEAD4  
TEAD3  
TEAD2  
TDRKH  
TDRD5  
TDRD3  
TDRD12  
TDP2  
TDP1  
TDG  
TCTN3  
TCTN2  
TCTN1  
TCTEX1D2  
TCTE3  
TCP11L1  
TCP1  
TCOF1  
TCIRG1  
TCHP  
TCFL5  
TCF7L1  
TCF7  
TCF3  
TCF25  
TCF24

TCF20  
TCF19  
TCF15  
TCERG1  
TCEANC2  
TCEAL9  
TCEAL5  
TCEAL4  
TCEAL3  
TCEA1  
TBX6  
TBX5  
TBX4  
TBX2  
TBX19  
TBRG4  
TBRG1  
TBPL1  
TBP  
TBL3  
TBL2  
TBL1XR1  
TBKBP1  
TBCD  
TBCC  
TBCB  
TBCA  
TBC1D7-LOC100130357;  
TBC1D7  
TBC1D3L; TBC1D3  
TBC1D3B; TBC1D3C  
TBC1D31  
TBC1D30  
TBC1D25  
TBC1D22B  
TBC1D22A  
TBC1D20  
TBC1D17  
TBC1D16  
TBC1D13  
TBC1D12  
TBC1D10B  
TBC1D1  
TAZ

TAX1BP3  
TAX1BP1  
TATDN3  
TATDN2  
TATDN1  
TASP1  
TASOR2  
TASOR  
TAS2R5  
TAS2R43; TAS2R45  
TAS2R4  
TAS2R31  
TAS2R20  
TAS2R19  
TAS2R14; PRH1-TAS2R14  
TAS2R10  
TAS2R1  
TARS3  
TARS1  
TARDBP  
TARBP2  
TARBP1  
TAPBP  
TAP2  
TAP1  
TAOK2  
TAOK1  
TANGO2  
TAMM41  
TALDO1  
TAL2  
TAGLN3  
TAGLN2  
TAF3  
TAF2  
TAF9  
TAF8  
TAF7  
TAF6  
TAF5L  
TAF5  
TAF4  
TAF3  
TAF1D

TAF1C  
TAF1B  
TAF1A  
TAF15  
TAF12  
TAF11  
TAF10  
TADA3  
TADA2A  
TACR2  
TACC3  
TACC2  
TAC3  
TAB1  
SZRD1  
SYTL1  
SYT8  
SYT5  
SYT16  
SYS1  
SYPL1  
SYP  
SYNRG  
SYNPR  
SYNJ2BP-COX16  
SYNJ2  
SYNGR4  
SYNGR3  
SYNGR2  
SYNGR1  
SYNGAP1  
SYNE4  
SYNCRIP  
SYN3  
SYMPK  
SYF2  
SYDE1  
SYCP2L  
SYCP2  
SYCE1L  
SWT1  
SWSAP1  
SWI5  
SVOPL

SVIP  
SVBP  
SV2A  
SUZ12  
SUV39H2  
SUV39H1  
SUSD1  
SURF6  
SURF4  
SURF2  
SUPV3L1  
SUPT7L  
SUPT6H  
SUPT5H  
SUPT4H1  
SUPT3H  
SUPT20H  
SUPT16H  
SUN1  
SUMO3  
SUMO2  
SUMO1  
SUMF2  
SULT1C2  
SULT1A3  
SUGT1  
SUGP2  
SUGP1  
SUFU  
SUDS3  
SUCO  
SUB1  
STYXL1  
STXBP6  
STXBP5L  
STXBP5  
STXBP4  
STXBP2  
STX8  
STX7  
STX6  
STX5  
STX4  
STX3

STX2  
STX1A  
STX18  
STX16  
STX10  
STT3B  
STT3A  
STRN4  
STRIP1  
STRC  
STRBP  
STRAP  
STRADA  
STRA8  
STRA6  
STPG1  
STOX1  
STOML3  
STOML2  
STOML1  
STN1  
STMP1  
STMN3  
STMN1  
STKLD1  
STK4  
STK39  
STK38  
STK36  
STK35  
STK33  
STK32C  
STK32B  
STK3  
STK25  
STK19  
STK17A  
STK11IP  
STK11  
STK10  
STIP1  
STIMATE-MUSTN1  
STIM2  
STIL

STEAP1B  
STC2  
STC1  
STAU2  
STAU1  
STAT5A  
STARD9  
STARD7  
STARD6  
STARD3NL  
STARD3  
STAMBPL1  
STAMBP  
STAM  
STAC3  
STAC2  
ST8SIA5  
ST8SIA1  
ST7L  
ST6GALNAC5  
ST6GALNAC4  
ST3GAL4  
ST3GAL2  
ST20  
ST14  
SSUH2  
SSU72  
SSTR5  
SSTR3  
SSRP1  
SSR4  
SSR3  
SSR2  
SSR1  
SSNA1  
SSH3  
SSH2  
SSC4D  
SSBP4  
SSBP1  
SSB  
SS18L2  
SS18  
SRXN1



SRSF9  
SRSF7  
SRSF6  
SRSF4  
SRSF3  
SRSF2  
SRSF12  
SRSF11  
SRSF10  
SRSF1  
SRRT  
SRRM5  
SRRM4  
SRRM3  
SRRD  
SRPX2  
SRPRB  
SRPK3  
SRPK2  
SRPK1  
SRP9  
SRP72  
SRP68  
SRP19  
SRP14  
SRM  
SRI  
SRGAP2  
SRF  
SREK1IP1  
SREK1  
SREBF2  
SRD5A3  
SRCAP  
SRC  
SRA1  
SQOR  
SQLE  
SPTY2D1OS  
SPTLC2  
SPTBN5  
SPTAN1  
SPSB2  
SPRYD3

SPRTN  
SPRN  
SPRED3  
SPRED1  
SPR  
SPPL3  
SPPL2B  
SPP1  
SPOUT1  
SPOP  
SPON2  
SPOCK1  
SPOCD1  
SPIRE2  
SPINT1  
SPINK4  
SPINK13  
SPINK1  
SPINDOC  
SPIN3  
SPIN2B  
SPIDR  
SPICE1  
SPIB  
SPHK1  
SPG7  
SPG21  
SPEG  
SPEF2  
SPEF1  
SPECC1L  
SPECC1  
SPDYE6  
SPDYE5  
SPDYE3  
SPDYA  
SPDL1  
SPDEF  
SPCS2  
SPCS1  
SPC25  
SPC24  
SPATS2L  
SPATS2

SPATC1L  
SPATC1  
SPATA7  
SPATA5L1  
SPATA45  
SPATA33  
SPATA2L  
SPATA25  
SPATA24  
SPATA20  
SPATA2  
SPATA17  
SPATA12  
SPAST  
SPARC  
SPANXC  
SPANXB1  
SPAG8  
SPAG7  
SPAG6  
SPAG5  
SPAG4  
SPAG17  
SPAG1  
SPACA6  
SPACA4  
SPA17  
SP9  
SP8  
SP6  
SP5  
SP140L  
SP1  
SOX9  
SOX4  
SOX21  
SOX2  
SOX18  
SOX13  
SOX12  
SOX11  
SOWAHD  
SORT1  
SORCS3

SORCS1  
SOGA1  
SOCS7  
SOCS5  
SOCS1  
SOBP  
SOAT1  
SNX8  
SNX5  
SNX33  
SNX32  
SNX30  
SNX3  
SNX27  
SNX24  
SNX22  
SNX21  
SNX17  
SNX16  
SNX15  
SNX14  
SNX12  
SNX11  
SNW1  
SNURF  
SNUPN  
SNU13  
SNTA1  
SNRPN  
SNRPG  
SNRPF  
SNRPE  
SNRPD3  
SNRPD2  
SNRPD1  
SNRPC  
SNRPB2  
SNRPB  
SNRPA1  
SNRPA  
SNRNP70  
SNRNP48  
SNRNP40  
SNRNP35

SNRNP27  
SNRNP25  
SNRNP200  
SNPH  
SNORC  
SNN  
SNHG32  
SNF8  
SND1  
SNCG  
SNCB  
SNAPIN  
SNAPC5  
SNAPC4  
SNAPC3  
SNAPC2  
SNAPC1  
SNAP91  
SNAP47  
SNAP29  
SNAP25  
SMYD5  
SMYD4  
SMYD3  
SMYD2  
SMURF2  
SMURF1  
SMUG1  
SMU1  
SMTNL2  
SMTN  
SMS  
SMPD4  
SMPD2  
SMOX  
SMNDC1  
SMN1; SMN2  
SMN1  
SMKR1  
SMIM8  
SMIM7  
SMIM5  
SMIM4  
SMIM32

SMIM30  
SMIM3  
SMIM29  
SMIM27  
SMIM26  
SMIM23  
SMIM22  
SMIM20  
SMIM15  
SMIM13  
SMIM10L1  
SMG9  
SMG7  
SMG5  
SMDT1  
SMCR8  
SMCO2  
SMCHD1  
SMC3  
SMC2  
SMC1B  
SMARCE1  
SMARCD3  
SMARCD2  
SMARCD1  
SMARCC1  
SMARCB1  
SMARCAL1  
SMARCA4  
SMAP1  
SMAGP  
SMAD5  
SMAD3  
SMAD2  
SLX4IP  
SLX4  
SLX1B  
SLX1A  
SLU7  
SLTM  
SLN  
SLIT1  
SLIRP  
SLF2

SLF1  
SLCO5A1  
SLCO4A1  
SLCO1C1  
SLC9C1  
SLC9B1  
SLC9A5  
SLC9A3R1  
SLC9A2  
SLC9A1  
SLC8A2  
SLC7A7  
SLC7A6OS  
SLC7A6  
SLC7A5  
SLC7A11  
SLC7A10  
SLC7A1  
SLC6A9  
SLC6A8  
SLC6A7  
SLC6A4  
SLC6A3  
SLC6A17  
SLC6A15  
SLC6A14  
SLC66A1L  
SLC66A1  
SLC5A5  
SLC5A10  
SLC52A2  
SLC51B  
SLC50A1  
SLC4A9  
SLC4A8  
SLC4A7  
SLC4A5  
SLC4A3  
SLC4A2  
SLC4A1AP  
SLC4A11  
SLC48A1  
SLC45A4  
SLC44A4

SLC44A3  
SLC43A2  
SLC41A3  
SLC41A1  
SLC3A2  
SLC39A7  
SLC39A6  
SLC39A4  
SLC39A3  
SLC39A13  
SLC39A10  
SLC39A1  
SLC38A9  
SLC38A8  
SLC38A7  
SLC38A6  
SLC38A5  
SLC38A1  
SLC37A3  
SLC37A1  
SLC36A3  
SLC36A1  
SLC35G5  
SLC35F6  
SLC35F3  
SLC35F2  
SLC35E4  
SLC35E3  
SLC35E1  
SLC35D2  
SLC35C2  
SLC35B3  
SLC35B2  
SLC35B1  
SLC35A4  
SLC35A2  
SLC35A1  
SLC34A3  
SLC30A8  
SLC30A6  
SLC30A5  
SLC30A3  
SLC2A8  
SLC2A6



SLC2A4RG  
SLC2A11  
SLC2A1  
SLC29A4  
SLC29A3  
SLC29A2  
SLC27A4  
SLC26A6  
SLC26A2  
SLC26A11  
SLC25A6  
SLC25A53  
SLC25A51  
SLC25A5  
SLC25A45  
SLC25A40  
SLC25A39  
SLC25A36  
SLC25A35  
SLC25A32  
SLC25A3  
SLC25A29  
SLC25A28  
SLC25A26  
SLC25A19  
SLC25A17  
SLC25A14  
SLC25A12  
SLC25A11  
SLC25A1  
SLC24A5  
SLC22A8  
SLC22A5  
SLC22A4  
SLC22A23  
SLC22A16  
SLC22A15  
SLC20A1  
SLC1A5  
SLC1A4  
SLC19A1  
SLC18B1  
SLC17A9  
SLC17A5

SLC16A6  
SLC16A3  
SLC15A4  
SLC15A2  
SLC13A4  
SLC12A9  
SLC12A8  
SLC12A7  
SLC12A5  
SLC11A2  
SLC11A1  
SLC10A4  
SLC10A3  
SLBP  
SLAMF8  
SKP2  
SKP1  
SKIV2L  
SKA3  
SKA2  
SKA1  
SIX5  
SIX4  
SIX3  
SIX2  
SIX1  
SIVA1  
SIRT7  
SIRT6  
SIRT4  
SIRT2  
SIRPG  
SIPA1L3  
SIPA1L2  
SIPA1  
SINHCAF  
SIN3B  
SIN3A  
SIM2  
SIL1  
SIAH3  
SIAH1  
SHROOM1  
SHQ1

SHOX2  
SHOC2  
SHLD3  
SHLD1  
SHKBP1  
SHISAL2B  
SHISAL2A  
SHISA8  
SHISA5  
SHISA2  
SHCBP1  
SHC3  
SHC2  
SHC1  
SHARPIN  
SH3TC1  
SH3PXD2B  
SH3PXD2A  
SH3KBP1  
SH3GLB2  
SH3GLB1  
SH3GL1  
SH3D21  
SH3BP5L  
SH3BP1  
SH3BGRL3  
SH2D7  
SH2D5  
SH2D3A  
SH2D2A  
SH2B2  
SH2B1  
SGTB  
SGTA  
SGSM3  
SGSM2  
SGSM1  
SGSH  
SGPP2  
SGO2  
SGO1  
SGF29  
SGCE  
SFXN4

SFXN3  
SFT2D2  
SFT2D1  
SFSWAP  
SFRP2  
SFR1  
SFPQ  
SFN  
SFI1  
SF3B6  
SF3B5  
SF3B4  
SF3B3  
SF3B2  
SF3B1  
SF3A3  
SF3A2  
SF3A1  
SF1  
SEZ6L2  
SEZ6  
SETMAR  
SETDB1  
SETD6  
SETD5  
SETD4  
SETD1B  
SETD1A  
SET  
SESTD1  
SERTAD3  
SERPINI2  
SERPINI1  
SERPINH1  
SERPINE2  
SERPINB6  
SERPINB11  
SERPINB1  
SERP1  
SERHL2  
SERGEF  
SERF2  
SERF1A; SERF1B  
SERBP1

SERAC1  
SEPTIN9  
SEPTIN8  
SEPTIN7  
SEPTIN5  
SEPTIN3  
SEPTIN2  
SEPTIN1  
SEPHS1  
SENP6  
SENP5  
SENP3  
SENP1  
SEMA7A  
SEMA6C  
SEMA6B  
SEMA5B  
SEMA4F  
SEMA4D  
SEMA4C  
SEMA4A  
SEMA3F  
SEMA3B  
SEM1  
SELENOW  
SELENOS  
SELENON  
SELENOM  
SELENOK  
SELENOH  
SELENOF  
SEL1L3  
SEH1L  
SECTM1  
SEC61G  
SEC61B  
SEC61A2  
SEC61A1  
SEC23IP  
SEC23B  
SEC22C  
SEC22A  
SEC13  
SEC11C

SEC11A  
SDHAF4  
SDHAF2  
SDHAF1  
SDF2L1  
SDF2  
SDCCAG8  
SCYL1  
SCX  
SCUBE3  
SCT  
SCRT1  
SCRIB  
SCO2  
SCN5A  
SCN1B  
SCML2  
SCMH1  
SCLY  
SCLT1  
SCIN  
SCGB2A1  
SCG3  
SCG2  
SCFD2  
SCFD1  
SCARA3  
SCAP  
SCAND1  
SCAMP5  
SCAMP4  
SCAMP3  
SCAMP2  
SCAF1  
SBSPON  
SBSN  
SBNO2  
SBNO1  
SBK1  
SBF1  
SAYSD1  
SAXO2  
SATL1  
SASS6

SART3  
SART1  
SARS2  
SARS1  
SARNP  
SAR1A  
SAPCD2  
SAPCD1  
SAP30BP  
SAP30  
SAP25  
SAP18  
SAP130  
SAMM50  
SAMD4B  
SAMD14  
SAMD13  
SAMD10  
SAMD1  
SALL4  
SALL3  
SALL2  
SAG  
SAFB2  
SAFB  
SAE1  
SACS  
SAC3D1  
SAAL1  
S1PR2  
S100PBP  
S100P  
S100B  
S100A9  
S100A6  
S100A5  
S100A4  
S100A3  
S100A2  
S100A16  
S100A14  
S100A13  
S100A11  
S100A10

S100A1  
RYSR3  
RYK  
RXYLT1  
RXRB  
RXFP4  
RWDD3  
RWDD2A  
RWDD1  
RUVBL2  
RUVBL1  
RUSC2  
RUSC1  
RUNX1  
RUNDC3A  
RUNDC1  
RUFY4  
RUFY2  
RUFY1  
RUBCN  
RTRAF  
RTN4IP1  
RTN3  
RTN2  
RTL8C  
RTL8A  
RTL10  
RTL1  
RTKN2  
RTKN  
RTF2  
RTF1  
RTCB  
RTCA  
RSU1  
RSRP1  
RSRC2  
RSRC1  
RSPO4  
RSPH9  
RSPH6A  
RSPH4A  
RSPH14  
RSPH1



RSL24D1  
RSL1D1  
RSKR  
RSBN1L  
RSAD1  
RS1  
RRS1  
RRP9  
RRP8  
RRP7A  
RRP36  
RRP1B  
RRP15  
RRP12  
RRP1  
RRNAD1  
RRM2  
RRM1  
RRBP1  
RRAS  
RRAGD  
RRAGC  
RRAGB  
RRAGA  
RPUSD4  
RPUSD3  
RPUSD2  
RPUSD1  
RPTOR  
RPSA  
RPS9  
RPS8  
RPS7  
RPS6KL1  
RPS6KC1  
RPS6KB2  
RPS6KB1  
RPS6KA4  
RPS6  
RPS5  
RPS4X  
RPS3A  
RPS3  
RPS29

RPS28  
RPS27A  
RPS27  
RPS26  
RPS25  
RPS24  
RPS23  
RPS21  
RPS20  
RPS2  
RPS19BP1  
RPS19  
RPS18  
RPS17  
RPS16  
RPS15A  
RPS15  
RPS14  
RPS13  
RPS12  
RPS11  
RPS10  
RPRM  
RPRD2  
RPRD1A  
RPP40  
RPP38-DT  
RPP38  
RPP30  
RPP25L  
RPP25  
RPN2  
RPN1  
RPLP2  
RPLP1  
RPLP0  
RPL9  
RPL8  
RPL7L1  
RPL7A  
RPL7  
RPL6  
RPL5  
RPL41

RPL4  
RPL39L  
RPL39  
RPL38  
RPL37A  
RPL37  
RPL36AL  
RPL36A-HNRNPH2  
RPL36A  
RPL36  
RPL35A  
RPL35  
RPL34  
RPL32  
RPL31  
RPL30  
RPL3  
RPL29  
RPL28  
RPL27A  
RPL27  
RPL26L1  
RPL26  
RPL24  
RPL23A  
RPL23  
RPL22L1  
RPL22  
RPL21  
RPL19  
RPL18A  
RPL18  
RPL17  
RPL15  
RPL14  
RPL13A  
RPL13  
RPL12  
RPL11  
RPL10A  
RPL10  
RPIA  
RPGRIP1L  
RPGR

RPF2  
RPF1  
RPE  
RPAP3  
RPAP2  
RPAP1  
RPAIN  
RPA3  
RPA2  
RPA1  
RP9  
ROMO1  
ROM1  
ROBO3  
ROBO1  
RNPS1  
RNPEPL1  
RNPEP  
RNPC3  
RNMT  
RNH1  
RNFT2  
RNF8  
RNF7  
RNF5  
RNF44  
RNF41  
RNF4  
RNF39  
RNF34  
RNF32  
RNF26  
RNF25  
RNF24  
RNF227  
RNF225  
RNF224  
RNF222  
RNF220  
RNF216  
RNF215  
RNF214  
RNF207  
RNF20

RNF2  
RNF187  
RNF183  
RNF181  
RNF167  
RNF166  
RNF157  
RNF149  
RNF148  
RNF145  
RNF144A  
RNF139  
RNF126  
RNF122  
RNF121  
RNF115  
RNF114  
RNF113A  
RNF103-CHMP3  
RNF10  
RNASET2  
RNASEK  
RNASEH2C  
RNASEH2B  
RNASEH2A  
RNASEH1  
RNASE1  
RMND5B  
RMI2  
RMDN1  
RLN2; RLN1  
RITA1  
RIT1  
RIPPLY2  
RIPOR1  
RIPK2  
RIOX2  
RIOX1  
RIOK2  
RIOK1  
RINT1  
RINL  
RING1  
RIN1

RIMS3  
RIMBP3C  
RIMBP3B  
RILPL1  
RIF1  
RIC8B  
RIC8A  
RIBC2  
RIBC1  
RHPN1  
RHOV  
RHOT2  
RHOT1  
RHOQ  
RHOG  
RHOF  
RHOC  
RHOBTB2  
RHOA  
RHO  
RHNO1  
RHEBL1  
RHEB  
RHBDL2  
RHBDL1  
RHBDF2  
RHBDF1  
RHBDD3  
RHBDD2  
RGS9BP  
RGS3  
RGS20  
RGS2  
RGS19  
RGS17  
RGS14  
RGS12  
RGS10  
RGR  
RGP1  
RGL4  
RGL3  
RGL2  
RFXAP

RFXANK  
RFX8  
RFX7  
RFX6  
RFX5  
RFX4  
RFX3  
RFX2  
RFX1  
RFWD3  
RFT1  
RFNG  
RFLNA; ZNF664-RFLNA  
RFC5  
RFC4  
RFC3  
RFC2  
RFC1  
REXO5  
REXO4  
REXO2  
REXO1  
REX1BD  
RETREG3  
RETREG2  
RERE  
REPIN1  
REP15  
RENBP  
REM2  
RELT  
RELL2  
RELCH  
RELB  
RELA  
REG4  
REG1A  
REEP4  
REEP2  
RECQL5  
RECQL4  
REC8  
RDM1  
RDH14

RDH13  
RCOR3  
RCOR2  
RCN3  
RCN2  
RCN1  
RCE1  
RCCD1  
RCC2  
RCC1L  
RCC1  
RCAN3  
RBX1  
RBSN  
RBPMS  
RBPJL  
RBPJ  
RBP2  
RBMX2  
RBMX  
RBMS1  
RBM8A  
RBM6  
RBM5  
RBM4B  
RBM48  
RBM45  
RBM44  
RBM42  
RBM4  
RBM39  
RBM38  
RBM34  
RBM33  
RBM3  
RBM28  
RBM27  
RBM26  
RBM25  
RBM24  
RBM22  
RBM19  
RBM18  
RBM17



RBM15B  
RBM15  
RBM14-RBM4  
RBM14  
RBM12B  
RBM12  
RBM10  
RBL1  
RBIS  
RBFOX3  
RBFOX2  
RBFA  
RBACK1  
RBBP8  
RBBP7  
RBBP5  
RBBP4  
RAVER2  
RASSF7  
RASSF4  
RASSF3  
RASSF1  
RASL12  
RASL10A  
RASGEF1A  
RASD2  
RASAL3  
RASAL2  
RASAL1  
RASA4  
RARS2  
RARS1  
RARG  
RARA  
RAPSN  
RAPGEFL1  
RAPGEF6  
RAPGEF1  
RAP2B  
RAP2A  
RAP1GAP2  
RAP1GAP  
RANGRF  
RANGAP1

RANBP3  
RANBP1  
RAN  
RAMAC  
RALY  
RALGDS  
RALGAPB  
RALB  
RALA  
RAI1  
RAE1  
RADIL  
RAD9A  
RAD54L  
RAD54B  
RAD52  
RAD51D  
RAD51C  
RAD51AP1  
RAD51  
RAD23A  
RAD21  
RAD18  
RAD17  
RAD1  
RACK1  
RACGAP1  
RAC1  
RABL6  
RABL2B  
RABL2A  
RABIF  
RABGGTB  
RABGGTA  
RABGEF1  
RABEP2  
RABAC1  
RAB9B  
RAB7B  
RAB7A  
RAB6B  
RAB5IF  
RAB5C  
RAB5B

RAB4B  
RAB4A  
RAB42  
RAB41  
RAB40C  
RAB40B  
RAB40AL  
RAB40A  
RAB3IP  
RAB3IL1  
RAB3GAP2  
RAB3GAP1  
RAB3D  
RAB3B  
RAB3A  
RAB35  
RAB34  
RAB33A  
RAB32  
RAB2A  
RAB29  
RAB28  
RAB24  
RAB22A  
RAB21  
RAB1B  
RAB1A  
RAB15  
RAB13  
RAB11FIP5  
RAB11FIP4  
RAB11B  
RAB11A  
RAB10  
R3HDM4  
R3HDM1  
R3HCC1L  
R3HCC1  
QTRT2  
QTRT1  
QSOX2  
QSOX1  
QSER1  
QRSL1

QRICH2  
QRICH1  
QRFP  
QPCTL  
QPCT  
QARS1  
PYURF  
PYROXD1  
PYM1  
PYGO2  
PYGB  
PYCR3  
PYCR2  
PYCR1  
PYCARD  
PXYLP1  
PXN  
PXMP4  
PWWP3A  
PWWP2B  
PWWP2A  
PWP1  
PVR  
PUSL1  
PUS7L  
PUS7  
PUS1  
PURG  
PURB  
PUM3  
PUF60  
PUDP  
PTTG1IP  
PTTG1  
PTRHD1  
PTRH2  
PTRH1  
PTPRN  
PTPRG  
PTPRA  
PTPN7  
PTPN6  
PTPN23  
PTPN2

PTPN18  
PTPN14  
PTPN12  
PTPN1  
PTPMT1  
PTPDC1  
PTPA  
PTP4A3  
PTP4A2  
PTOV1  
PTMA  
PTK7  
PTK2  
PTHLH  
PTGFRN  
PTGES3L-AARSD1  
PTGES3L  
PTGES3  
PTGES2  
PTGES  
PTGDR2  
PTF1A  
PTDSS2  
PTDSS1  
PTCD3  
PTCD1  
PTBP3  
PTBP2  
PTBP1  
PSTPIP1  
PSTK  
PSRC1  
PSPN  
PSPH  
PSPC1  
PSORS1C2  
PSORS1C1  
PSMG4  
PSMG3  
PSMG2  
PSMG1  
PSMF1  
PSME4  
PSME3IP1

PSME3  
PSME2  
PSME1  
PSMD9  
PSMD8  
PSMD7  
PSMD6  
PSMD4  
PSMD3  
PSMD2  
PSMD14  
PSMD13  
PSMD11  
PSMD10  
PSMD1  
PSMC6  
PSMC5  
PSMC4  
PSMC3IP  
PSMC3  
PSMC2  
PSMB7  
PSMB6  
PSMB5  
PSMB4  
PSMB3  
PSMB2  
PSMB1  
PSMA7  
PSMA5  
PSMA4  
PSMA3  
PSMA2  
PSMA1  
PSKH1  
PSIP1  
PSG6  
PSENEN  
PSEN2  
PSEN1  
PSD  
PSCA  
PSAPL1  
PSAP

PRXL2C  
PRXL2B  
PRX  
PRUNE1  
PRTFDC1  
PRSS41  
PRSS38  
PRSS27  
PRSS21  
PRSS2  
PRRX2  
PRRX1  
PRRT3  
PRRT2  
PRRG3  
PRRC2C  
PRRC2A  
PRR7  
PRR5  
PRR4; PRH1  
PRR36  
PRR35  
PRR3  
PRR29  
PRR22  
PRR19  
PRR15L  
PRR14L  
PRR14  
PRR13  
PRR12  
PRR11  
PRPSAP2  
PRPH2  
PRPH  
PRPF8  
PRPF6  
PRPF4B  
PRPF40B  
PRPF40A  
PRPF4  
PRPF39  
PRPF38B  
PRPF38A

PRPF31  
PRPF3  
PRPF19  
PRPF18  
PROSER3  
PROSER1  
PROCA1  
PROB1  
PRMT7  
PRMT5  
PRMT3  
PRMT2  
PRMT1  
PRLHR  
PRL  
PRKRIP1  
PRKRA  
PRKDC  
PRKD2  
PRKCSH  
PRKCI  
PRKCG  
PRKCD  
PRKCA  
PRKAR1B  
PRKAG3  
PRKAG1  
PRKAB1  
PRKAA2  
PRIM2  
PRIM1  
PRICKLE4  
PRICKLE3  
PREP  
PRELID3B  
PRELID3A  
PRELID2  
PRELID1  
PREB  
PRDX5  
PRDX4  
PRDX2  
PRDX1  
PRDM9



PRDM4  
PRDM15  
PRDM13  
PRDM12  
PRDM11  
PRDM10  
PRCC  
PRC1  
PRAME  
PRAG1  
PRAF2  
PRADC1  
PRAC2  
PQBP1  
PPWD1  
PPT2  
PPT1  
PPRC1  
PPP6R3  
PPP6R2  
PPP6R1  
PPP6C  
PPP5C  
PPP4R1  
PPP4C  
PPP3CB  
PPP2R5E  
PPP2R5D  
PPP2R5B  
PPP2R5A  
PPP2R3C  
PPP2R3B  
PPP2R3A  
PPP2R2D  
PPP2R2C  
PPP2R1A  
PPP2CA  
PPP1R9B  
PPP1R9A  
PPP1R8  
PPP1R7  
PPP1R42  
PPP1R3F  
PPP1R37

PPP1R35  
PPP1R21  
PPP1R2  
PPP1R1B  
PPP1R18; LOC107987457  
PPP1R16A  
PPP1R15A  
PPP1R14D  
PPP1R14C  
PPP1R14B  
PPP1R13L  
PPP1R13B  
PPP1R12C  
PPP1R12A  
PPP1R11  
PPP1CC  
PPP1CB  
PPP1CA  
PPOX  
PPME1  
PPM1N  
PPM1M  
PPM1G  
PPM1F  
PPM1D  
PPIP5K1  
PPIL6  
PPIL3  
PPIL2  
PPIL1  
PPIH  
PPIG  
PPIE  
PPIC  
PIIB  
PPIAL4C  
PPIAL4A  
PPIA  
PPHLN1  
PPFIA4  
PPFIA3  
PPEF1  
PPDPF  
PPCDC

PPAT  
PPARG  
PPARD  
PPAN  
PPA1  
POU6F1  
POU5F2  
POU5F1  
POU3F3  
POU3F2  
POU2F1  
POTEI  
POTEF  
PORCN  
POPDC3  
POPDC2  
POP7  
POP5  
POP4  
POP1  
PON2  
POMZP3  
POMT2  
POMT1  
POMP  
POMGNT2  
POMGNT1  
POM121L2  
POM121C  
POLRMT  
POLR3K  
POLR3H  
POLR3G  
POLR3F  
POLR3E  
POLR3D  
POLR3C  
POLR3A  
POLR2M  
POLR2L  
POLR2K  
POLR2J  
POLR2I  
POLR2H

POLR2G  
POLR2F  
POLR2E  
POLR2D  
POLR2C  
POLR2B  
POLR1E  
POLR1D  
POLR1C  
POLR1B  
POLR1A  
POLQ  
POLM  
POLL  
POLG2  
POLE4  
POLE3  
POLE2  
POLE  
POLDIP3  
POLDIP2  
POLD3  
POLD2  
POLD1  
POLA2  
POLA1  
POGZ  
POGLUT2  
POGK  
POFUT2  
PODXL2  
PODNL1  
POC5  
POC1B  
POC1A  
PNRC2  
PNPT1  
PNPLA6  
PNPLA1  
PNO1  
PNN  
PNMA3  
PNMA1  
PNLDC1

PNKP  
PNISR  
PNCK  
PMVK  
PMS1  
PMPCB  
PMPCA  
PMM1  
PML  
PMFBP1  
PMF1-BGLAP  
PMF1  
PMEPA1  
PMCH  
PMAIP1  
PM20D2  
PLXND1  
PLXNB1  
PLXNA3  
PLXNA2  
PLXNA1  
PLXDC1  
PLVAP  
PLTP  
PLSCR3  
PLRG1  
PLPPR5  
PLPPR3  
PLPPR2  
PLPP2  
PLP2  
PLOD3  
PLOD2  
PLOD1  
PLK5  
PLK4  
PLK3  
PLK1  
PLIN3  
PLGRKT  
PLEKHS1  
PLEKHO2  
PLEKHO1  
PLEKHN1

PLEKHM2  
PLEKHM1  
PLEKHJ1  
PLEKHH3  
PLEKHH1  
PLEKHG5  
PLEKHG4B  
PLEKHG4  
PLEKHG3  
PLEKHG2  
PLEKHF2  
PLEKHB2  
PLEKHB1  
PLEKHA8  
PLEC  
PLD6  
PLD3  
PLD2  
PLCXD1  
PLCG1  
PLCE1  
PLCD4  
PLCD3  
PLCB3  
PLCB1  
PLBD2  
PLBD1  
PLAUR  
PLAU  
PLAGL2  
PLAG1  
PLAC9  
PLAC8L1  
PLAC1  
PLA2G7  
PLA2G6  
PLA2G4F  
PLA2G4E  
PLA2G4D  
PLA2G15  
PKP4  
PKP3  
PKNOX1  
PKN3

PKN1  
PKMYT1  
PKM  
PKIG  
PKIB  
PKIA  
PKDCC  
PKD1  
PJVK  
PJA1  
PIWIL4  
PITX3  
PITX2  
PITX1  
PITRM1  
PITPNB  
PITHD1  
PISD  
PIP5KL1  
PIP5K1C  
PIP5K1A  
PIP4P2  
PIP4P1  
PIP4K2C  
PIP4K2B  
PIP4K2A  
PINX1  
PINLYP  
PIN4  
PIN1  
PIMREG  
PIM3  
PIM2  
PILRB  
PIK3R6  
PIK3R2  
PIK3IP1  
PIK3C3  
PIK3C2B  
PIH1D2  
PIH1D1  
PIGZ  
PIGX  
PIGW

PIGU  
PIGT  
PIGS  
PIGM  
PIGL  
PIGH  
PIGG  
PIGF  
PIGC  
PIGBOS1  
PIGA  
PIFO  
PIF1  
PIEZO1  
PIDD1  
PICK1  
PIAS4  
PIAS3  
PIAS2  
PIANP  
PI4KB  
PI4K2A  
PI3  
PI15  
PHYHIPL  
PHTF2  
PHTF1  
PHRF1  
PHPT1  
PHOSPHO2  
PHLDB3  
PHLDA2  
PHKG2  
PHKG1  
PHKA2  
PHIP  
PHF5A  
PHF23  
PHF21B  
PHF21A  
PHF20L1  
PHF20  
PHF19  
PHF14



PHF13  
PHF12  
PHF11  
PHF10  
PHF1  
PHEX  
PHETA2  
PHETA1  
PHC2  
PHC1  
PHB2  
PHB  
PHAX  
PGS1  
PGP  
PGM3  
PGM2L1  
PGLYRP4  
PGLS  
PGK1  
PGGHG  
PGF  
PGD  
PGC  
PGBD4  
PGBD2  
PGBD1  
PGAP6  
PGAP2  
PGAM5  
PFN4  
PFN1  
PFKP  
PFKM  
PFKL  
PFKFB4  
PFKFB2  
PFDN6  
PFDN5  
PFDN4  
PFDN2  
PFDN1  
PFAS  
PEX5L

PEX26  
PEX2  
PEX16  
PEX11B  
PET117  
PET100  
PES1  
PERP  
PERM1  
PELP1  
PELO  
PELI1  
PEG10  
PEF1  
PEA15  
PDZD7  
PDZD11  
PDSS1  
PDRG1  
PDPR  
PDLIM7  
PDLIM4  
PDLIM1  
PDK1  
PDIA4  
PDIA3  
PDIA2  
PDHB  
PDHA2  
PDHA1  
PDGFRL  
PDGFRB  
PDGFB  
PDGFA  
PDE9A  
PDE7A  
PDE6D  
PDE6C  
PDE6B  
PDE6A  
PDE5A  
PDE4C  
PDE4A  
PDE1C

PDCL3  
PDCL2  
PDCL  
PDCD7  
PDCD6  
PDCD5  
PDCD4  
PDCD2L  
PDCD2  
PDCD11  
PDCD10  
PDCD1  
PDAP1  
PCYT1A  
PCYOX1L  
PCSK1N  
PCP2  
PCNX4  
PCNX3  
PCNX2  
PCNT  
PCNP  
PCNA  
PCMTD2  
PCMT1  
PCLAF  
PCIF1  
PCID2  
PCGF6  
PCGF3  
PCGF2  
PCGF1  
PCF11  
PCED1B  
PCED1A  
PCDHGA6  
PCDHGA1  
PCDHB9  
PCDHB2  
PCDHB10  
PCDHA9  
PCDHA7  
PCDHA5  
PCDHA4

PCDHA3  
PCDHA2  
PCDHA1  
PCDH8  
PCBP4  
PCBP2  
PBXIP1  
PBX4  
PBX2  
PBK  
PBDC1  
PAXX  
PAXIP1  
PAXBP1  
PAX9  
PAX8  
PAX6  
PAWR  
PATZ1  
PASK  
PARVG  
PARVB  
PARS2  
PARPBP  
PARP2  
PARP12  
PARP1  
PARN  
PARL  
PARK7  
PARG  
PARD6G  
PARD6B  
PARD3  
PAQR8  
PAQR6  
PAQR5  
PAQR4  
PAPSS1  
PAPOLG  
PAPOLA  
PAPLN  
PANX3  
PANO1

PANK2  
PAN3  
PAM16  
PALM  
PALD1  
PALB2  
PAK4  
PAK2  
PAK1IP1  
PAK1  
PAIP2  
PAIP1  
PAGR1  
PAFAH1B3  
PAFAH1B2  
PAFAH1B1  
PAF1  
PAEP  
PACSIN3  
PACSIN2  
PACSIN1  
PACS2  
PACS1  
PACRGL  
PACC1  
PABPN1  
PABPC4  
PABPC3  
PABPC1L  
PABPC1  
PAAF1  
PA2G4  
P4HA2  
P4HA1  
P3H4  
P3H1  
P2RY6  
P2RY11  
P2RX5  
P2RX4  
OXTR  
OXLD1  
OXCT2  
OXA1L

OVOL3  
OVGP1  
OTX1  
OTULIN  
OTUD7B  
OTUD6B  
OTUD5  
OTUD3  
OTUB1  
OTP  
OTOG  
OSTC  
OST4  
OSR2  
OSGIN2  
OSGEPL1  
OSGEP  
OSER1  
OSBPL7  
OSBPL3  
OSBPL2  
OSBP2  
ORMDL2  
ORMDL1  
ORC6  
ORC5  
ORC4  
ORC3  
ORC2  
ORC1  
ORAI2  
ORAI1  
OR7C1  
OR7A5  
OR5V1  
OR56A5  
OR51E2  
OR51E1  
OR2H2  
OR2H1  
OR2B6  
OR2B2  
OR2AG2  
OR1Q1

OR1J1  
OR1F1  
OR14J1  
OR13A1  
OR12D2  
OR12D1  
OR11H7  
OR11A1  
OR10Q1  
OPTN  
OPRM1  
OPRL1  
OPRD1  
OPN1SW  
OPA3  
OLIG2  
OLFML2B  
OLFML2A  
OLFM4  
OLA1  
OIP5  
OGT  
OGG1  
OGFR  
OGFOD3  
OGFOD2  
OGFOD1  
OGA  
OFD1  
ODR4  
ODF2  
ODC1  
ODAPH  
OCRL  
OCA2  
OBSL1  
OBSCN  
OBP2A  
OBI1  
OAZ3  
OAZ1  
OARD1  
NYAP1  
NXT1

NXPH4  
NXPH3  
NXNL2  
NXF1  
NVL  
NUTM2G  
NUTF2  
NUSAP1  
NUP93  
NUP88  
NUP85  
NUP62  
NUP54  
NUP50  
NUP43  
NUP42  
NUP37  
NUP35  
NUP214  
NUP210  
NUP205  
NUP188  
NUP160  
NUP155  
NUP133  
NUP107  
NUMBL  
NUFIP2  
NUFIP1  
NUF2  
NUDT5  
NUDT4  
NUDT3  
NUDT22  
NUDT21  
NUDT2  
NUDT19  
NUDT18  
NUDT17  
NUDT16L1  
NUDT15  
NUDT14  
NUDT11  
NUDT1



NUDCD3  
NUDCD1  
NUDC  
NUCKS1  
NUBP2  
NUB1  
NUAK2  
NUAK1  
NTS  
NTPCR  
NTNG2  
NTNG1  
NTMT1  
NT5M  
NT5DC4  
NT5DC3  
NT5DC2  
NT5C3B  
NT5C3A  
NT5C  
NSUN7  
NSUN5  
NSUN4  
NSUN2  
NSRP1  
NSMF  
NSMCE4A  
NSMCE2  
NSMCE1  
NSMAF  
NSL1  
NSG2  
NSFL1C  
NSF  
NSDHL  
NSD2  
NSD1  
NSA2  
NRSN2  
NRSN1  
NRM  
NRIP3  
NRIP2  
NRGN

NRF1  
NREP  
NRDC  
NRBP1  
NRAS  
NRARP  
NR6A1  
NR5A1  
NR2F6  
NR2C2AP  
NR2C1  
NR1H3  
NR1H2  
NR0B1  
NQO1  
NPTX1  
NPTN  
NPRL3  
NPRL2  
NPPB  
NPPA  
NPM3  
NPM1  
NPLOC4  
NPIP5  
NPIP13  
NPIP11  
NPIPA3  
NPIPA1  
NPHS2  
NPHS1  
NPHP3  
NPHP1  
NPFFR1  
NPEPPS  
NPEPL1  
NPDC1  
NPC2  
NPC1  
NPAS2  
NPAS1  
NOXRED1  
NOXA1  
NOX4

NOX3  
NOX1  
NOVA1  
NOTCH1  
NOSIP  
NOP9  
NOP58  
NOP56  
NOP53  
NOP2  
NOP16  
NOP14  
NOP10  
NONO  
NOMO1  
NOM1  
NOLC1  
NOL9  
NOL8  
NOL7  
NOL6  
NOL4L  
NOL3  
NOL12  
NOL11  
NOL10  
NOD1  
NOC4L  
NOC3L  
NOC2L  
NOB1  
NOA1  
NMU  
NMT1  
NME9  
NME8  
NME7  
NME6  
NME4  
NME3  
NME2  
NME1-NME2  
NME1  
NMB

NLRP1  
NLK  
NLGN3  
NLGN1  
NLE1  
NKX6-1  
NKX3-2  
NKX2-5  
NKX2-2  
NKTR  
NKRF  
NKPD1  
NKIRAS2  
NKAPD1  
NKAP  
NKAIN4  
NKAIN1  
NISCH  
NIPSNAP3B  
NIPSNAP2  
NIPBL  
NIPAL3  
NIPAL2  
NIPA1  
NIP7  
NINJ1  
NIN  
NIFK  
NIF3L1  
NICN1  
NIBAN2  
NHP2  
NHLH2  
NHLH1  
NGRN  
NGLY1  
NGDN  
NFYC  
NFYA  
NFXL1  
NFX1  
NFU1  
NFS1  
NFRKB

NFKBIL1  
NFKBIE  
NFKBID  
NFKBIB  
NFKB2  
NFE2L3  
NFE2  
NFATC4  
NFATC2IP  
NFATC2  
NF2  
NEUROG3  
NEUROD2  
NEURL4  
NEURL3  
NEURL2  
NEURL1  
NEU1  
NETO2  
NES  
NEPRO  
NENF  
NEMP2  
NEMP1  
NELL1  
NELFE  
NELFCD  
NELFB  
NELFA  
NEK8  
NEK6  
NEK3  
NEK2  
NEK11  
NEIL3  
NEFL  
NEFH  
NEDD9  
NEDD8-MDP1  
NEDD8  
NEDD4L  
NEDD1  
NECTIN2  
NECTIN1

NECAP2  
NECAB3  
NDUFV3  
NDUFV1  
NDUFS8  
NDUFS7  
NDUFS6  
NDUFS5  
NDUFS4  
NDUFS3  
NDUFC2  
NDUFC1  
NDUFB9  
NDUFB8  
NDUFB7  
NDUFB6  
NDUFB5  
NDUFB4  
NDUFB3  
NDUFB2  
NDUFB11  
NDUFB10  
NDUFB1  
NDUFAF8  
NDUFAF7  
NDUFAF6  
NDUFAF5  
NDUFAF4  
NDUFAF3  
NDUFAF2  
NDUFA9  
NDUFA8  
NDUFA7  
NDUFA6  
NDUFA4L2  
NDUFA4  
NDUFA3  
NDUFA2  
NDUFA13  
NDUFA12  
NDUFA11  
NDUFA10  
NDUFA1  
NDST2

NDRG3  
NDRG1  
NDP  
NDOR1  
NDE1  
NDC80  
NDC1  
NCSTN  
NCS1  
NCOR2  
NCOA6  
NCOA5  
NCOA3  
NCLN  
NCL  
NCKIPSD  
NCKAP5L  
NCK2  
NCF4  
NCF2  
NCDN  
NCCRP1  
NCBP3  
NCBP2AS2  
NCBP2  
NCBP1  
NCAPH2  
NCAPH  
NCAPG2  
NCAPG  
NCAPD3  
NCAPD2  
NBPF20  
NBPF19  
NBN  
NBL1; MICOS10-NBL1  
NBEAL2  
NBDY  
NBAS  
NAXE  
NAT9  
NAT8L  
NAT14  
NAT10

NASP  
NARS1  
NARF  
NAPSA  
NAPG  
NAPB  
NAP1L4  
NAP1L1  
NANS  
NANP  
NANOS3  
NANOS1  
NANOG  
NAIF1  
NAGPA  
NAGK  
NAE1  
NADSYN1  
NACC2  
NACC1  
NACA2  
NACA  
NABP2  
NABP1  
NAB2  
NAALADL1  
NAA80  
NAA60  
NAA50  
NAA40  
NAA38  
NAA35  
NAA25  
NAA20  
NAA16  
NAA15  
NAA10  
N6AMT1  
N4BP3  
N4BP2L2  
N4BP1  
MZT2B  
MZT2A  
MZT1



MZF1  
MYT1  
MYRF  
MYPOP  
MYPN  
MYOZ3  
MYO9B  
MYO5C  
MYO1H  
MYO1G  
MYO1C  
MYO1A  
MYO19  
MYO15B  
MYNN  
MYLK3  
MYLK2  
MYLIP  
MYL6B  
MYL6  
MYL5  
MYL4  
MYL12B  
MYL12A  
MYH7  
MYH15  
MYH13  
MYG1  
MYEF2  
MYDGF  
MYCNOS  
MYCN  
MYCBPAP  
MYCBP  
MYC  
MYBPHL  
MYBPC3  
MYBPC2  
MYBL2  
MYBL1  
MYBBP1A  
MYB  
MYADML2  
MYADM

MXRA7  
MXD4  
MXD3  
MXD1  
MVP  
MVK  
MVD  
MVB12B  
MVB12A  
MUTYH  
MUS81  
MUC22  
MUC19  
MUC12  
MUC1  
MTX3  
MTX2  
MTX1  
MTRF1L  
MTREX  
MTRES1  
MTR  
MTPN  
MTPAP  
MTMR3  
MTMR2  
MTMR14  
MTMR11  
MTMR1  
MTLN  
MTIF3  
MTIF2  
MTHFSD  
MTHFR  
MTHFD2  
MTHFD1L  
MTG2  
MTG1  
MTFR2  
MTFP1  
MTFMT  
MTF2  
MTERF4  
MTERF3

MTERF2  
MTERF1  
MTDH  
MTCL1  
MTCH1  
MTBP  
MTA3  
MTA2  
MTA1  
MSX1  
MSTO1  
MSS51  
MSRB2  
MSMB  
MSL3  
MSL2  
MSL1  
MSI2  
MSI1  
MSH6  
MSH5  
MSH4  
MSH2  
MSANTD3  
MSANTD2  
MSANTD1  
MS4A8  
MS4A15  
MRTO4  
MRTFA  
MRS2  
MRRF  
MRPS9  
MRPS7  
MRPS6  
MRPS5  
MRPS35  
MRPS34  
MRPS33  
MRPS30  
MRPS28  
MRPS27  
MRPS26  
MRPS25

MRPS24  
MRPS23  
MRPS22  
MRPS21  
MRPS2  
MRPS18C  
MRPS18B  
MRPS18A  
MRPS17  
MRPS16  
MRPS15  
MRPS14  
MRPS12  
MRPS11  
MRPS10  
MRPL9  
MRPL58  
MRPL57  
MRPL55  
MRPL53  
MRPL52  
MRPL51  
MRPL50  
MRPL48  
MRPL47  
MRPL45  
MRPL44  
MRPL43  
MRPL42  
MRPL40  
MRPL4  
MRPL38  
MRPL37  
MRPL36  
MRPL35  
MRPL33  
MRPL32  
MRPL30  
MRPL3  
MRPL28  
MRPL27  
MRPL24  
MRPL22  
MRPL21

MRPL20  
MRPL2  
MRPL18  
MRPL17  
MRPL15  
MRPL14  
MRPL13  
MRPL12  
MRPL11  
MRPL10  
MRPL1  
MROH6  
MROH1  
MRNIP  
MRM3  
MRM2  
MRM1  
MRI1  
MRGBP  
MRFAP1L1  
MRFAP1  
MRE11  
MRAP2  
MPZL3  
MPZL1  
MPV17L2  
MPV17  
MPRIP  
MPP6  
MPP4  
MPP3  
MPP2  
MPI  
MPHOSPH6  
MPHOSPH10  
MPDU1  
MPC2  
MOV10  
MOSPD3  
MOSPD1  
MORN2  
MORN1  
MORF4L2  
MORF4L1

MORC2  
MON1A  
MOK  
MOGS  
MOCS3  
MOB4  
MOB3C  
MOB3A  
MOB2  
MOB1A  
MNX1  
MNT  
MND1  
MNAT1  
MMS22L  
MMS19  
MMP9  
MMP3  
MMP26  
MMP24OS  
MMP17  
MMP14  
MMP13  
MMP12  
MMP11  
MMP10  
MMP1  
MMEL1  
MMD  
MLXIP  
MLST8  
MLLT6  
MLLT3  
MLLT10  
MLLT1  
MLKL  
MLH3  
MLH1  
MLF2  
MLEC  
MKS1  
MKRN3  
MKRN2OS  
MKRN2

MKRN1  
MKNK2  
MKNK1  
MKKS  
MKI67  
MIXL1  
MITD1  
MISP  
MIS18BP1  
MIS18A  
MIS12  
MIPOL1  
MIOX  
MINK1  
MINDY4  
MINAR1  
MIIP  
MIGA2  
MIF4GD  
MIF  
MIER2  
MIEN1  
MIEF2  
MIEF1  
MIDN  
MID1IP1  
MID1  
MICOS13  
MICOS10  
MICB  
MICALL2  
MICALL1  
MICAL1  
MICA  
MIB2  
MIA  
MGST3  
MGME1  
MGAT5B  
MGAT5  
MGAT4A  
MGAT1  
MGA  
MFSD6

MFSD5  
MFSD4B  
MFSD4A  
MFSD3  
MFSD2B  
MFSD14C  
MFSD14B  
MFSD13A  
MFSD12  
MFSD10  
MFNG  
MFN1  
MFHAS1  
MFGE8  
MFF  
MFAP2  
MFAP1  
MEX3D  
MEX3C  
MEX3A  
METTL9  
METTL8  
METTL6  
METTL5  
METTL4  
METTL3  
METTL2B  
METTL2A  
METTL26  
METTL25  
METTL23  
METTL22  
METTL21A  
METTL18  
METTL17  
METTL16  
METTL11B  
METTL1  
METRNL  
METAP2  
METAP1D  
METAP1  
MEST  
MESP2



MESP1  
MESD  
MEPCE  
MEP1A  
MEN1  
MEMO1  
MELTF  
MELK  
MEIS3  
MEIS2  
MEIS1  
MEIG1  
MEGF8  
MEGF11  
MEF2D  
MEF2B; BORCS8-MEF2B  
MEF2B  
MED9  
MED8  
MED7  
MED6  
MED4  
MED31  
MED30  
MED29  
MED28  
MED27  
MED26  
MED25  
MED24  
MED22  
MED21  
MED20  
MED19  
MED17  
MED16  
MED15  
MED12  
MED11  
MED10  
MED1  
MECR  
MECP2  
MEAK7

MEA1  
ME3  
ME2  
MDS2  
MDP1  
MDM4  
MDK  
MDH2  
MDH1B  
MDFI  
MDC1  
MCUR1  
MCUB  
MCU  
MCTS1  
MCRS1  
MCRIP1  
MCOLN3  
MCOLN1  
MCMDC2  
MCMBP  
MCM8  
MCM7  
MCM6  
MCM5  
MCM4  
MCM3AP  
MCM3  
MCM2  
MCM10  
MCIDAS  
MCF2L  
MCCD1  
MCAT  
MCAM  
MC1R  
MBOAT7  
MBLAC1  
MBD6  
MBD5  
MBD3  
MBD2  
MBD1  
MAZ

MAX  
MAVS  
MAU2  
MATR3  
MATN4  
MATN3  
MATN1  
MASTL  
MAST2  
MARVELD1  
MARS2  
MARS1  
MARK4  
MARK3  
MARK2  
MARCKSL1  
MARCKS  
MARCHF9  
MARCHF7  
MARCHF4  
MARCHF3  
MARCHF10  
MAPT  
MAPRE1  
MAPKBP1  
MAPKAPK5  
MAPKAPK3  
MAPKAPK2  
MAPKAP1  
MAPK9  
MAPK8IP3  
MAPK8IP2  
MAPK7  
MAPK3  
MAPK1IP1L  
MAPK15  
MAPK14  
MAPK13  
MAPK12  
MAPK11  
MAPK1  
MAP7D2  
MAP7D1  
MAP6D1

MAP4K5  
MAP4K4  
MAP4K2  
MAP4  
MAP3K9  
MAP3K8  
MAP3K7  
MAP3K6  
MAP3K4  
MAP3K3  
MAP3K12  
MAP3K11  
MAP3K10  
MAP3K1  
MAP2K7  
MAP2K5  
MAP2K2  
MAP1S  
MAP1LC3B2  
MAP1LC3B  
MAP1A  
MAP11  
MANSC4  
MANF  
MANBAL  
MANBA  
MAN2B1  
MAN1B1  
MAMSTR  
MAML1  
MALT1  
MALSU1  
MAL2  
MAK16  
MAK  
MAGOHB  
MAGOH  
MAGEF1  
MAGED4B  
MAGED4  
MAGED2  
MAGED1  
MAGEA10-MAGEA5  
MAGEA10

MAFG  
MAFA  
MAF1  
MAEA  
MADD  
MAD2L2  
MAD2L1BP  
MAD2L1  
MAD1L1  
MACROH2A2  
MACROH2A1  
MACROD2  
MACIR  
M1AP  
LZTS3  
LZTS2  
LZTS1  
LZTR1  
LYZ  
LYSMD4  
LYSMD1  
LYRM4  
LYRM2  
LYPLAL1  
LYPLA2  
LYPD4  
LYPD3  
LYPD1  
LYN  
LYL1  
LYG2  
LYG1  
LYAR  
LY6K  
LY6H  
LY6G6C  
LY6G5C  
LY6G5B  
LVRN  
LUZP1  
LUC7L3  
LUC7L2  
LUC7L  
LTV1

LTO1  
LTBR  
LTB  
LTA4H  
LTA  
LST1  
LSP1  
LSMEM1  
LSM8  
LSM7  
LSM6  
LSM5  
LSM4  
LSM3  
LSM2  
LSM14B  
LSM14A  
LSM12  
LSM11  
LSM10  
LSM1  
LSG1  
LRWD1  
LRTM2  
LRSAM1  
LRRIQ1  
LRRFIP2  
LRRD1  
LRRC8B  
LRRC75B  
LRRC75A  
LRRC74B  
LRRC74A  
LRRC73  
LRRC71  
LRRC69  
LRRC61  
LRRC59  
LRRC57  
LRRC56  
LRRC47  
LRRC46  
LRRC45  
LRRC42

LRRC41  
LRRC39  
LRRC37B  
LRRC37A3  
LRRC37A  
LRRC36  
LRRC27  
LRRC26  
LRRC23  
LRRC14  
LRRC10B  
LRRC1  
LRR1  
LRPPRC  
LRPAP1  
LRP8  
LRP5L  
LRP12  
LRP11  
LRP10  
LRMDA  
LRIG2  
LRGUK  
LRFN4  
LRFN3  
LRFN1  
LRCH3  
LPO  
LPIN3  
LPGAT1  
LPCAT4  
LPCAT1  
LPAR6  
LPAR2  
LOXL4  
LOXL3  
LOXL2  
LOX  
LONP1  
LOC730183  
LOC730098  
LOC728485  
LOC388780  
LOC112268124

LOC107987373; MRPL23  
LOC105376731  
LOC105372824; PDXK  
LOC102723713; TP53TG3F;  
LOC102723655; TP53TG3D;  
TP53TG3E  
LOC101928120  
LOC101927572  
LOC100505549  
LOC100289561  
LOC100287036  
LOC100130449  
LOC100130357  
LOC100129484  
LOC100128108  
LMX1B  
LMTK2  
LMO3  
LMNTD1  
LMNB2  
LMNB1  
LMNA  
LMF2  
LMCD1  
LMBR1L  
LMAN2L  
LMAN2  
LLPH  
LLGL2  
LLGL1  
LKAAEAR1  
LIX1L  
LIPT2  
LIPT1  
LINS1  
LINGO1  
LINC02875  
LINC02210-CRHR1; CRHR1  
LINC02054  
LINC00452  
LIN9  
LIN7B  
LIN37  
LIN28B



LIN28A  
LIMS1  
LIMK2  
LIMK1  
LIMD2  
LILRB3; LOC107987425;  
LOC107987462; LOC102725035  
LIG3  
LIG1  
LIF  
LIAS  
LHX5  
LHX4  
LHX1  
LHFPL5  
LHFPL4  
LHFPL3  
LHFPL2  
LHB  
LGI2  
LGALSL  
LGALS9  
LGALS3BP  
LGALS3  
LGALS2  
LGALS14  
LGALS1  
LFNG  
LETMD1  
LETM2  
LETM1  
LEPROTL1  
LEO1  
LENG9  
LENG8  
LENG1  
LEMD3  
LEMD2  
LEMD1  
LEF1  
LDOC1  
LDLRAD3  
LDHA  
LDB1

LDAH  
LCTL  
LCT  
LCORL  
LCOR  
LCNL1  
LCN2  
LCN1  
LCMT1  
LCLAT1  
LBR  
LBHD1  
LAYN  
LAT  
LASP1  
LAS1L  
LARS1  
LARP4B  
LARP1  
LARGE2  
LAPTM5  
LAPTM4B  
LANCL2  
LANCL1  
LAMTOR5  
LAMTOR4  
LAMTOR2  
LAMTOR1  
LAMP5  
LAMC1  
LAMB4  
LAMB1  
LAMA5  
LAMA4  
LAIR2  
LAIR1  
LAGE3  
LAD1  
L3MBTL2  
L3MBTL1  
KY  
KXD1  
KTI12  
KSR2

KSR1  
KRTDAP  
KRTCAP2  
KRTAP6-3  
KRTAP5-10  
KRTAP5-1  
KRTAP3-1  
KRTAP20-2  
KRTAP19-1  
KRT8  
KRT79  
KRT78  
KRT40  
KRT26  
KRT25  
KRT23  
KRT18  
KRT17  
KRT15  
KRT10  
KRR1  
KRI1  
KREMEN2  
KRBOX4  
KRBA1  
KPTN  
KPNB1  
KPNA5  
KPNA4  
KPNA2  
KNTC1  
KNSTRN  
KNOP1  
KMT5C  
KMT5A  
KMT2D  
KMT2B  
KMT2A  
KLRG2  
KLRC2  
KLK6  
KLK14  
KLK1  
KLHL7

KLHL42  
KLHL38  
KLHL35  
KLHL31  
KLHL25  
KLHL23; PHOSPHO2-KLHL23  
KLHL22  
KLHL18  
KLHL17  
KLHL12  
KLHDC8B  
KLHDC8A  
KLHDC4  
KLHDC3  
KLF16  
KLC3  
KLC2  
KLC1  
KIZ  
KITLG  
KISS1R  
KISS1  
KIRREL3  
KIRREL2  
KIN  
KIFC3  
KIFC2  
KIFC1  
KIFBP  
KIF9  
KIF7  
KIF5C  
KIF5B  
KIF5A  
KIF4A  
KIF3C  
KIF3A  
KIF2C  
KIF2A  
KIF26B  
KIF24  
KIF23  
KIF22  
KIF21B

KIF20B  
KIF20A  
KIF18B  
KIF18A  
KIF15  
KIF14  
KIF12  
KIF11  
KIAA1841  
KIAA1614  
KIAA1586  
KIAA1549L  
KIAA1549  
KIAA1522  
KIAA1328  
KIAA1324  
KIAA1143  
KIAA0930  
KIAA0895L  
KIAA0753  
KIAA0556  
KIAA0319L  
KIAA0319  
KIAA0100  
KHSRP  
KHDRBS3  
KHDRBS1  
KHDC4  
KHDC1  
KEAP1  
KDM5C  
KDM5B  
KDM4C  
KDM3B  
KDM3A  
KDM2B  
KDM2A  
KDM1A  
KDEL3  
KDEL2  
KDEL1  
KCTD8  
KCTD7  
KCTD6

KCTD5  
KCTD20  
KCTD2  
KCTD19  
KCTD17  
KCTD15  
KCTD13  
KCTD11  
KCTD10  
KCTD1  
KCP  
KCNV2  
KCNV1  
KCNRG  
KCNQ4  
KCNQ3  
KCNQ2  
KCNQ1  
KCNN4  
KCNMB4  
KCNMB3  
KCNK9  
KCNK7  
KCNK12  
KCNJ9  
KCNJ14  
KCNJ11  
KCNIP3  
KCNIP2  
KCNH4  
KCNH3  
KCNH2  
KCNG3  
KCNG2  
KCNG1  
KCNF1  
KCNE5  
KCNE3  
KCND1  
KCNC4  
KCNC3  
KCNC1  
KCNB2  
KCNAB3

KCMF1  
KBTBD6  
KBTBD3  
KBTBD2  
KAZALD1  
KATNBL1  
KATNB1  
KATNAL2  
KATNA1  
KAT8  
KAT7  
KAT5  
KAT2A  
KAT14  
KARS1  
KANSL3  
KANSL2  
KANSL1  
KAAG1  
JUP  
JUND  
JTB  
JSRP1  
JRKL  
JRK  
JPT2  
JPT1  
JOSD2  
JOSD1  
JMJD6  
JMJD4  
JCAD  
JARID2  
JAML  
JAM3  
JAK3  
JAGN1  
JAG2  
JAG1  
JADE2  
IZUMO1  
IWS1  
IVNS1ABP  
ITPRIPL1

ITPR3  
ITPKC  
ITPKA  
ITPA  
ITM2C  
ITIH6  
ITGB5  
ITGB4  
ITGB3BP  
ITGB1BP2  
ITGB1BP1  
ITGAX  
ITGAE  
ITGA6  
ITGA5  
ITGA3  
ITGA2  
ITFG2  
ISYNA1  
ISY1  
IST1  
ISM2  
ISL2  
ISL1  
ISG20L2  
ISG20  
ISCU  
ISCA2  
ISCA1  
IRX6  
IRX5  
IRX3  
IRGQ  
IRGC  
IRF5  
IRF3  
IRF2BP2  
IRF2BP1  
IRAK4  
IRAK2  
IRAK1BP1  
IRAK1  
IQSEC1  
IQGAP3



IQCE  
IQCD  
IQCC  
IQCB1  
IQCA1  
IPO9  
IPO7  
IPO5  
IPO4  
IPO13  
IPO11  
IP6K2  
IP6K1  
INTU  
INTS9  
INTS8  
INTS7  
INTS5  
INTS4  
INTS3  
INTS14  
INTS13  
INTS12  
INTS11  
INTS1  
INSYN2A  
INSM1  
INSL3  
INPPL1  
INPP5K  
INPP5J  
INPP5F  
INPP5E  
INPP5A  
INPP4A  
INO80E  
INO80D  
INO80C  
INO80B  
INO80  
INKA2  
INKA1  
INHA  
ING5

ING4  
ING3  
ING2  
INF2  
INCENP  
INCA1  
INAVA  
INAFM2  
INAFM1  
IMPG2  
IMPDH2  
IMPDH1  
IMP4  
IMP3  
IMMT  
IMMP1L  
ILVBL  
ILKAP  
ILF3  
ILF2  
IL9R  
IL4I1  
IL3RA  
IL37  
IL31RA  
IL2RA  
IL27RA  
IL1R2  
IL1A  
IL18BP  
IL18  
IL17RD  
IL17RA  
IL17F  
IL17B  
IL15RA  
IL12A  
IL11RA  
IL11  
IL10RB  
IKZF4  
IKBKE  
IKBKB  
IKBIP

IK  
IGSF3  
IGSF22  
IGSF11  
IGHMBP2  
IGFL4  
IGFL2  
IGFBPL1  
IGF2BP3  
IGF2BP2  
IGF2BP1  
IGDCC4  
IGDCC3  
IGBP1  
IFTAP  
IFT81  
IFT80  
IFT74  
IFT52  
IFT43  
IFT27  
IFT22  
IFT20  
IFT172  
IFT140  
IFT122  
IFRD2  
IFRD1  
IFNGR2  
IFNAR2  
IFITM3  
IFITM10  
IFI35  
IFI30  
IFI27L2  
IFI27L1  
IFFO2  
IFFO1  
IER5L  
IER5  
IER3IP1  
IER3  
IDUA  
IDI2

IDH3G  
IDH3B  
IDE  
ICMT  
ICE2  
ICE1  
ICA1L  
IBSP  
IBA57  
IARS1  
IAH1  
HYPK  
HYLS1  
HYI  
HYAL4  
HYAL3  
HYAL2  
HUWE1  
HUS1B  
HUS1  
HTT  
HTRA4  
HTRA3  
HTRA2  
HTR3B  
HTR3A  
HTR2C  
HTR1F  
HTR1D  
HTATSF1  
HSPH1  
HSPE1-MOB4  
HSPE1  
HSPD1  
HSPBP1  
HSPBAP1  
HSPB11  
HSPB1  
HSPA6  
HSPA5  
HSPA4  
HSPA2  
HSPA1L  
HSPA1B

HSPA1A  
HSPA14  
HSPA13  
HSPA12A  
HSP90B1  
HSP90AB1  
HSP90AA1  
HSF4  
HSF2BP  
HSF2  
HSF1  
HSDL1  
HSD17B7  
HSD17B3  
HSD17B1  
HSD11B2  
HSD11B1L  
HSCB  
HSBP1L1  
HSBP1  
HS6ST2  
HS3ST6  
HS3ST5  
HS2ST1  
HS1BP3  
HROB  
HRK  
HRH3  
HRCT1  
HRAS  
HR  
HPSE2  
HPS6  
HPS4  
HPS1  
HPF1  
HPDL  
HPCAL1  
HPCA  
HOXD9  
HOXD8  
HOXD4  
HOXD3  
HOXD13

HOXD11  
HOXD10  
HOXD1  
HOXC9  
HOXC8  
HOXC6  
HOXC4  
HOXC13  
HOXC12  
HOXC11  
HOXC10  
HOXB9  
HOXB8  
HOXB7  
HOXB13  
HOXA9  
HOXA6  
HOXA5  
HOXA3  
HOXA2  
HOXA11  
HOXA10  
HOPX  
HOOK2  
HOMEZ  
HOMER3  
HOMER1  
HNRNPUL2  
HNRNPUL1  
HNRNPU  
HNRNPR  
HNRNPM  
HNRNPLL  
HNRNPL  
HNRNPK  
HNRNPH3  
HNRNPH1  
HNRNPF  
HNRNPDL  
HNRNPD  
HNRNPC  
HNRNPAB  
HNRNPA3  
HNRNPA2B1

HNRNPA1L2  
HNRNPA1  
HNRNPA0  
HNF1B  
HMX2  
HMMR  
HMGXB4  
HMGXB3  
HMGN4  
HMGN3  
HMGN2  
HMGN1  
HMGB2  
HMGB1  
HMGA2  
HMGA1  
HMG20B  
HMCES  
HMBS  
HM13  
HLTF  
HLA-A  
HKDC1  
HK2  
HK1  
HJURP  
HIRA  
HIPK4  
HIP1R  
HINT1  
HINFP  
HILPDA  
HIKESHI  
HIGD2A  
HIGD1B  
HIF1AN  
HID1  
HIC2  
HHIPL2  
HHEX  
HGS  
HGH1  
HFM1  
HEY1

HEXD  
HEXB  
HEXA  
HES7  
HES6  
HES4  
HES2  
HERPUD2  
HERC4  
HEPACAM2  
HEMK1  
HELLS  
HELB  
HECTD2  
HEBP2  
HEATR6  
HEATR3  
HEATR1  
HDLBP  
HDHD5  
HDGFL2  
HDGF  
HDDC3  
HDDC2  
HDAC8  
HDAC7  
HDAC5  
HDAC4  
HDAC3  
HDAC2  
HDAC11  
HDAC10  
HDAC1  
HCST  
HCRT  
HCN2  
HCFC1R1  
HCFC1  
HCCS  
HCAR1  
HBQ1  
HAX1  
HAVCR1  
HAUS8



HAUS7  
HAUS6  
HAUS5  
HAUS3  
HAUS2  
HAUS1  
HAT1  
HASPIN  
HAS3  
HARS2  
HARS1  
HARBI1  
HAPLN3  
HAPLN1  
HAP1  
HAGHL  
HACD1  
HABP4  
H4C9  
H4C5  
H4C4  
H4C3  
H4C11  
H4-16  
H3C7  
H3C4  
H3C3  
H3C13  
H3C11  
H3-5  
H3-3B  
H3-3A  
H2BU1  
H2BC9  
H2BC8  
H2BC6  
H2BC18  
H2BC15  
H2BC14  
H2AZ2  
H2AZ1  
H2AX  
H2AW  
H2AJ

H2AC7  
H2AC4  
H2AC21  
H2AC20  
H2AC17  
H2AC16  
H2AC14  
H2AC12  
H1-5  
H1-4  
H1-3  
H1-10  
GZF1  
GYS1  
GYPC  
GYG1  
GXYLT2  
GUK1  
GUF1  
GUCY2D  
GUCA2A  
GTSF1L  
GTSE1  
GTPBP8  
GTPBP6  
GTPBP4  
GTPBP3  
GTPBP2  
GTPBP1  
GTF3C6  
GTF3C5  
GTF3C4  
GTF3C3  
GTF3C2  
GTF3C1  
GTF3A  
GTF2IRD1  
GTF2H5  
GTF2H4  
GTF2H3  
GTF2H2C  
GTF2H2; GTF2H2C  
GTF2H1  
GTF2F2

GTF2F1  
GTF2E2  
GTF2E1  
GTF2B  
GTF2A2  
GTDC1  
GSTP1  
GSTO2  
GSTCD  
GSS  
GSR  
GSPT1  
GSK3A  
GSE1  
GSDME  
GSDMD  
GSDMB  
GSC  
GRWD1  
GRSF1  
GRPEL2  
GRN  
GRM4  
GRK7  
GRK6  
GRK4  
GRK3  
GRK2  
GRIPAP1  
GRINA  
GRIN3B  
GRIN2D  
GRIN2A  
GRIN1  
GRIK5  
GRIK4  
GRID2IP  
GRID2  
GRIA4  
GRIA2  
GRB7  
GRB2  
GRASP  
GRAMD2A

GRAMD1A  
GPX8  
GPX7  
GPX4  
GPX1  
GPSM2  
GPSM1  
GPS2  
GPS1  
GPRIN1  
GPRC6A  
GPRC5D  
GPR89B  
GPR89A  
GPR85  
GPR84  
GPR63  
GPR37L1  
GPR35  
GPR3  
GPR22  
GPR21; RABGAP1  
GPR19  
GPR173  
GPR161  
GPR160  
GPR157  
GPR156  
GPR137C  
GPR137  
GPR119  
GPR108  
GPR107  
GPN3  
GPN2  
GPN1  
GPM6B  
GPKOW  
GPI  
GPD2  
GPD1L  
GPCPD1  
GPC3  
GPC2

GPBP1  
GPATCH8  
GPATCH4  
GPATCH3  
GPATCH2L  
GPATCH2  
GPATCH1  
GPAT4  
GPAT2  
GPANK1  
GPALPP1  
GPAA1  
GOSR2  
GORASP2  
GORASP1  
GORAB  
GON7  
GON4L  
GOLT1B  
GOLPH3L  
GOLM1  
GOLGA8B  
GOLGA8A  
GOLGA7B  
GOLGA6L9  
GOLGA6L7  
GOLGA6L4  
GOLGA6L2  
GOLGA6L10; GOLGA6L19  
GOLGA3  
GOLGA2  
GNS  
GNRHR  
GNRH1  
GNPDA2  
GNPDA1  
GNPAT  
GNL3  
GNL2  
GNL1  
GNG8  
GNG5  
GNG4  
GNG13

GNB3  
GNB2  
GNB1L  
GNB1  
GNAZ  
GNAS  
GNAL  
GNAI3  
GNA15  
GNA12  
GNA11  
GMPS  
GMPR2  
GMPPB  
GMPPA  
GMNN  
GMIP  
GMFG  
GMFB  
GMEB2  
GMEB1  
GMDS  
GMCL1  
GM2A  
GLTP  
GLT8D1  
GLS  
GLRX3  
GLRX2  
GLP1R  
GLO1  
GLMP  
GLMN  
GLIS2  
GLIPR2  
GLI4  
GLI1  
GLG1  
GLE1  
GLDN  
GLB1L  
GLB1  
GLA  
GKN1

GKAP1  
GK5  
GJD4  
GJC1  
GJB6  
GJA3  
GIT2  
GIT1  
GIPR  
GIPC1  
GIP  
GINS4  
GINS3  
GINS2  
GINS1  
GIGYF2  
GIGYF1  
GID8  
GHRL  
GHDC  
GGTLC3  
GGTLC1  
GGT7  
GGPS1  
GGNBP2  
GGN  
GGCT  
GGA3  
GGA2  
GGA1  
GFY  
GFPT1  
GFI1  
GFER  
GET4  
GET3  
GEMIN8  
GEMIN7  
GEMIN6  
GEMIN5  
GEMIN4  
GEMIN2  
GDPGP1  
GDPD5

GDPD3  
GDPD2  
GDPD1  
GDI2  
GDI1  
GDF15  
GDF11  
GDF1; CERS1  
GDAP1L1  
GDAP1  
GCNT7  
GCNT3  
GCNA  
GCN1  
GCM1  
GCFC2  
GBX2  
GBP2  
GBGT1  
GBF1  
GBA2  
GBA  
GATD1  
GATC  
GATAD2B  
GATAD2A  
GATAD1  
GAST  
GAS8  
GAS7  
GAS2L3  
GAS2L1  
GART  
GARS1  
GAREM2  
GAR1  
GAPVD1  
GAPDHS  
GAPDH  
GAP43  
GAN  
GALR2  
GALNT6  
GALNT5



GALNT10  
GALE  
GAL3ST4  
GAL3ST3  
GAL3ST1  
GAL  
GAK  
GADD45GIP1  
GAD2  
GAD1  
GABRR3  
GABRR1  
GABRQ  
GABRE  
GABRD  
GABRB1  
GABPB2  
GABPB1  
GABBR1  
GABARAPL2  
GABARAP  
GAB2  
G6PD  
G6PC3  
G3BP1  
G2E3  
FZR1  
FZD9  
FZD7  
FZD6  
FZD2  
FXD5  
FXD3  
FXD2  
FXR2  
FXR1  
FUT9  
FUT7  
FUT4  
FUT3  
FUT2  
FUT11  
FUT1  
FUS

FUNDC2  
FUNDC1  
FUCA2  
FUBP1  
FTSJ3  
FTSJ1  
FTL  
FTH1  
FSTL4  
FSTL3  
FSD1L  
FSCN3  
FSCN2  
FSCN1  
FRS3  
FRRS1L  
FRMD8  
FRMD5  
FRMD1  
FRG1  
FRAT2  
FRAS1  
FRA10AC1  
FOXSI  
FOXRED2  
FOXP4  
FOXP1  
FOXN1  
FOXM1  
FOXL1  
FOXK2  
FOXK1  
FOXJ3  
FOXJ1  
FOXH1  
FOXG1  
FOXF2  
FOXES  
FOXES  
FOXES1  
FOXES4L1  
FOXES4  
FOXES2  
FOXES1  
FOXES2

FOLR1  
FOCAD  
FNTA  
FNDC8  
FNDC3B  
FNDC11  
FNDC10  
FNBP4  
FNBP1L  
FNBP1  
FN3KRP  
FMNL3  
FMNL2  
FMNL1  
FLYWCH2  
FLYWCH1  
FLVCR1  
FLT3LG  
FLRT1  
FLOT2  
FLOT1  
FLNC  
FLNB  
FLNA  
FLJ45513  
FLII  
FLCN  
FLAD1  
FLACC1  
FKRP  
FKBPL  
FKBP9  
FKBP8  
FKBP6  
FKBP4  
FKBP3  
FKBP2  
FKBP1A  
FKBP15  
FKBP14  
FKBP11  
FKBP10  
FJX1  
FIZ1

FIS1  
FIP1L1  
FIGNL2  
FIGNL1  
FIG4  
FIBP  
FIBCD1  
FHOD1  
FHL3  
FHIT  
FHDC1  
FGFR4  
FGFR3  
FGFR1OP2  
FGFBP3  
FGF8  
FGF17  
FGF11  
FGD6  
FGD3  
FGD1  
FEZ2  
FEV  
FERMT3  
FERMT1  
FER1L6  
FER1L5  
FER  
FEN1  
FDXACB1  
FDX2  
FDPS  
FDCSP  
FCSK  
FCHSD1  
FCHO1  
FCGR2A; FCGR2C  
FCGR1B  
FCGR1A  
FCGBP  
FCER1G  
FBXW9  
FBXW8  
FBXW4

FBXW12  
FBXO9  
FBXO5  
FBXO46  
FBXO45  
FBXO44  
FBXO43  
FBXO42  
FBXO41  
FBXO4  
FBXO32  
FBXO30  
FBXO22  
FBXO17  
FBXO10  
FBXL8  
FBXL7  
FBXL6  
FBXL22  
FBXL2  
FBXL19  
FBXL18  
FBXL15  
FBXL13  
FBXL12  
FBRSL1  
FBRSL  
FBN3  
FBLN1  
FBLL1  
FBLIM1  
FBL  
FBH1  
FBF1  
FAXC  
FAU  
FATE1  
FASTKD5  
FASTKD3  
FASTKD2  
FASTKD1  
FASTK  
FARSB  
FARSA

FARS2  
FANK1  
FANCM  
FANCL  
FANCI  
FANCG  
FANCF  
FANCE  
FANCD2OS  
FANCD2  
FANCB  
FANCA  
FAM98C  
FAM98B  
FAM98A  
FAM91A1  
FAM90A1  
FAM89B  
FAM89A  
FAM86C1  
FAM83H  
FAM83G  
FAM83D  
FAM81B  
FAM81A  
FAM78B  
FAM78A  
FAM72D  
FAM72C  
FAM72B  
FAM72A  
FAM71F2  
FAM71F1  
FAM71E1  
FAM71D  
FAM53C  
FAM53B  
FAM50A  
FAM3B  
FAM3A  
FAM32A  
FAM25E  
FAM24B  
FAM241B

FAM234A  
FAM229A  
FAM228B  
FAM227A  
FAM222B  
FAM222A  
FAM220A  
FAM219B  
FAM219A  
FAM217B  
FAM217A  
FAM216A  
FAM214B  
FAM20B  
FAM209B  
FAM209A  
FAM207A  
FAM204A  
FAM200B  
FAM200A  
FAM199X  
FAM193B  
FAM193A  
FAM189B  
FAM186A  
FAM184B  
FAM178B  
FAM177B  
FAM174C  
FAM171B  
FAM171A2  
FAM168B  
FAM166C  
FAM160B2  
FAM156A  
FAM155B  
FAM149B1  
FAM136A  
FAM135A  
FAM133B  
FAM131C  
FAM131A  
FAM122B  
FAM120AOS

FAM118B  
FAM118A  
FAM117B  
FAM111B  
FAM111A  
FAM110A  
FAM104B  
FAM104A  
FAM102B  
FAIM  
FAF2  
FAF1  
FADS3  
FADD  
FABP9  
FABP7  
FABP6  
FABP5  
FAAP24  
FAAP20  
FAAP100  
F2RL3  
EZR  
EZH2  
EZH1  
EYA3  
EYA1  
EXTL3  
EXTL2  
EXTL1  
EXT2  
EXT1  
EXOSC9  
EXOSC8  
EXOSC7  
EXOSC6  
EXOSC5  
EXOSC4  
EXOSC3  
EXOSC2  
EXOSC10  
EXOSC1  
EXOG  
EXOC7



EXOC6B  
EXOC6  
EXOC4  
EXOC3  
EXOC2  
EXOC1  
EXO5  
EXO1  
EXD3  
EXD1  
EWSR1  
EVX1  
EVPL  
EVI5L  
EVC2  
EVA1B  
ETV6  
ETV5  
ETV4  
ETV3L  
ETV3  
ETV2  
ETNK1  
ETF1  
ETAA1  
ESYT3  
ESS2  
ESRRA  
ESPL1  
ESM1  
ESF1  
ESCO2  
ESCO1  
ERVMER34-1  
ERV3-1-ZNF117; ZNF117  
ERV3-1  
ERP44  
ERP29  
ERP27  
ERO1A  
ERMP1  
ERLEC1  
ERICH4  
ERICH2

ERICH1  
ERI3  
ERI1  
ERH  
ERGIC3  
ERGIC2  
ERFL  
ERFE  
ERF  
ERCC8  
ERCC6L  
ERCC5; BIVM-ERCC5  
ERCC3  
ERCC2  
ERCC1  
ERC2  
ERBB3  
ERAS  
ERAL1  
EQTN  
EPS8L3  
EPS8L2  
EPS8L1  
EPS15L1  
EPRS1  
EPPK1  
EPOR  
EPN3  
EPN2  
EPN1  
EPHX4  
EPHB3  
EPHB2  
EPA8  
EPA5  
EPA10  
EPDR1  
EPCAM  
EPC1  
EPB41L2  
EP400  
EOLA2  
EOGT  
ENY2

ENTR1  
ENTPD6  
ENTPD3  
ENTPD2  
ENTPD1  
ENSA  
ENOPH1  
ENO4  
ENO2  
ENO1  
ENKD1  
ENGASE  
ENAH  
EN2  
EN1  
EMP3  
EML6  
EML4  
EML3  
EML2  
EMILIN2  
EMG1  
EME2  
EME1  
EMD  
EMC9  
EMC8  
EMC7  
EMC4  
EMC3  
EMC2  
EMC10  
ELP6  
ELP5  
ELP4  
ELP2  
ELP1  
ELOVL7  
ELOVL4  
ELOVL1  
ELOF1  
ELOC  
ELOB  
ELOA2

ELMOD3  
ELMOD2  
ELMO3  
ELMO2  
ELL3  
ELL  
ELK1  
ELF4  
ELF3  
ELAVL3  
ELAVL1  
ELAC2  
EIPR1  
EIF6  
EIF5B  
EIF5A2  
EIF5A  
EIF4G2  
EIF4ENIF1  
EIF4EBP1  
EIF4E2  
EIF4E  
EIF4B  
EIF4A3  
EIF4A2  
EIF4A1  
EIF3M  
EIF3K  
EIF3J  
EIF3I  
EIF3H  
EIF3G  
EIF3F  
EIF3E  
EIF3D  
EIF3CL  
EIF3B  
EIF2S3B  
EIF2S3  
EIF2S2  
EIF2S1  
EIF2D  
EIF2B5  
EIF2B4

EIF2B3  
EIF2B2  
EIF2B1  
EIF2AK1  
EIF2A  
EIF1B  
EIF1AD  
EIF1  
EID3  
EID2B  
EID2  
EHMT2  
EHMT1  
EHD4  
EHD2  
EHD1  
EHBP1L1  
EGLN3  
EGLN2  
EGFL8  
EGFL7  
EGFL6  
EFTUD2  
EFR3B  
EFNA5  
EFNA4  
EFNA3  
EFNA1  
EFL1  
EFHD2  
EFHC1  
EFCAB8  
EFCAB7  
EFCAB5  
EFCAB3  
EFCAB2  
EFCAB11  
EFCAB10  
EEPD1  
EEFSEC  
EEF2KMT  
EEF2  
EEF1G  
EEF1E1

EEF1D  
EEF1B2  
EEF1AKNMT  
EEF1AKMT3  
EEF1AKMT2  
EEF1AKMT1  
EEF1A1  
EED  
EDRF1  
EDIL3  
EDF1  
EDEM2; MMP24-AS1-EDEM2  
EDDM13  
EDC3  
EDARADD  
ECT2  
ECSIT  
ECPAS  
ECE2  
ECD  
EBNA1BP2  
EBF1  
EBAG9  
EAF2  
E4F1  
E2F8  
E2F7  
E2F6  
E2F5  
E2F4  
E2F3  
E2F2  
E2F1  
DZIP3  
DZIP1L  
DZANK1  
DYRK4  
DYRK2  
DYRK1B  
DYNLT1  
DYNLRB1  
DYNLL1  
DYNC2LI1  
DYNC1LI1

DYNC1I2  
DYNC1H1  
DYM  
DYDC2  
DYDC1  
DXO  
DVL3  
DVL2  
DVL1  
DUT  
DUSP9  
DUSP8  
DUSP7  
DUSP4  
DUSP28  
DUSP23  
DUSP22  
DUSP18  
DUSP15  
DUSP14  
DUSP13  
DUSP12  
DUSP11  
DUS4L  
DUS3L  
DUS2  
DUS1L  
DUOX1  
DTYMK  
DTX3  
DTX2  
DTWD1  
DTNBP1  
DTNB  
DTL  
DTD1  
DSTYK  
DSTN  
DSN1  
DSCC1  
DRP2  
DROSHA  
DRICH1  
DRG2

DRG1  
DRD4  
DRD2  
DRC3  
DRC1  
DRAXIN  
DRAP1  
DRAM2  
DRAM1  
DR1  
DQX1  
DPYSL5  
DPYSL4  
DPY30  
DPY19L3  
DPPA3  
DPP9  
DPP8  
DPP6  
DPP3  
DPM3  
DPM2  
DPM1  
DPH7  
DPH6  
DPH5  
DPH3  
DPH2  
DPF2  
DPF1  
DPCD  
DPAGT1  
DOT1L  
DONSON  
DOLK  
DOK3  
DOK1  
DOHH  
DOCK6  
DOCK3  
DNTTIP2  
DNTTIP1  
DNPH1  
DNPEP



DNMT3B  
DNMT3A  
DNMT1  
DNM2  
DNM1L  
DNM1  
DNLZ  
DNHD1  
DNER  
DNASE1L2  
DNASE1  
DNAL4  
DNAL1  
DNAJC9  
DNAJC8  
DNAJC7  
DNAJC6  
DNAJC5G  
DNAJC5  
DNAJC4  
DNAJC30  
DNAJC21  
DNAJC2  
DNAJC18  
DNAJC17  
DNAJC10  
DNAJC1  
DNAJB7  
DNAJB6  
DNAJB5  
DNAJB2  
DNAJB13  
DNAJB12  
DNAJB11  
DNAJB1  
DNAJA4  
DNAH8  
DNAH3  
DNAH17  
DNAH14  
DNAH12  
DNAAF5  
DNAAF4  
DNA2

DMWD  
DMTF1  
DMRT3  
DMRT2  
DMRT1  
DMPK  
DMP1  
DMKN  
DMC1  
DMBX1  
DMBT1  
DMAP1  
DMAC2L  
DMAC2  
DLX6  
DLX5  
DLX4  
DLX3  
DLX2  
DLX1  
DLL4  
DLL3  
DLK2  
DLGAP5  
DLGAP4  
DLGAP3  
DLG5  
DLG4  
DLG3  
DLAT  
DKKL1  
DKK1  
DKC1  
DISP3  
DIS3L2  
DIRAS1  
DIPK2B  
DIPK1B  
DIP2A  
DIMIT1  
DIDO1  
DIAPH3  
DHX9  
DHX8

DHX57  
DHX38  
DHX37  
DHX35  
DHX34  
DHX33  
DHX30  
DHX16  
DHX15  
DHRS7B  
DHRS13  
DHRS11  
DHPS  
DHDH  
DGUOK  
DGKZ  
DGKQ  
DGKK  
DGKI  
DGKH  
DGKD  
DGKA  
DGCR8  
DGCR2  
DGAT1  
DFFB  
DFFA  
DEUP1  
DESI2  
DESI1  
DERL2  
DERL1  
DEPDC4  
DEPDC1B  
DEPDC1  
DENR  
DENND6B  
DENND6A  
DENND5A  
DENND4B  
DENND3  
DENND2D  
DENND1A  
DENND10

DELEC1  
DEK  
DEGS1  
DEFB126  
DEFA6  
DEF8  
DEF6  
DEDD2  
DEDD  
DEAF1  
DDX59  
DDX56  
DDX55  
DDX54  
DDX52  
DDX51  
DDX50  
DDX5  
DDX49  
DDX47  
DDX46  
DDX42  
DDX41  
DDX4  
DDX39B  
DDX39A  
DDX31  
DDX28  
DDX27  
DDX24  
DDX23  
DDX21  
DDX20  
DDX19A  
DDX18  
DDX17  
DDX11  
DDX10  
DDX1  
DDRGK1  
DDR1  
DDOST  
DDN  
DDIT3

DDIAS  
DDHD1  
DDB1  
DDAH2  
DDA1  
DCUN1D5  
DCUN1D2  
DCTPP1  
DCTN5  
DCTN4  
DCTN3  
DCTN2  
DCTN1  
DCP2  
DCP1B  
DCP1A  
DCLRE1C  
DCLRE1B  
DCDC2B  
DCDC2  
DCAF7  
DCAF4L1  
DCAF4  
DCAF17  
DCAF16  
DCAF15  
DCAF13  
DCAF12  
DBR1  
DBNL  
DBNDD2  
DBN1  
DBI  
DBF4B  
DBF4  
DAZAP1  
DAXX  
DAW1  
DARS2  
DARS1  
DAPK3  
DAPK2  
DAP3  
DAP

DAND5  
DALRD3  
DAGLB  
DAGLA  
DAD1  
DACH2  
CZIB  
CYTH4  
CYTH2  
CYSTM1  
CYSRT1  
CYRIB  
CYREN  
CYP2W1  
CYP2R1  
CYP27B1  
CYP26B1  
CYP24A1  
CYP20A1  
CYP19A1  
CYHR1  
CYCS  
CYC1  
CYBC1  
CYBA  
CYB5RL  
CYB5R3  
CYB5R1  
CYB5B  
CYB561D2  
CYB561D1  
CXXC5  
CXXC1  
CXorf65  
CXorf56  
CXorf38  
CXCR4  
CXCL5  
CXCL3  
CXCL17  
CWF19L1  
CWC27  
CWC25  
CWC22

CWC15  
CUZD1  
CUX1  
CUTC  
CUTA  
CUL9  
CUL7  
CUL4B  
CUL2  
CUL1  
CUEDC2  
CUEDC1  
CUBN  
CTXN1  
CTU2  
CTU1  
CTTNBP2NL  
CTTN  
CTSV  
CTSK  
CTSC  
CTSA  
CTRL  
CTRC  
CTPS2  
CTNS  
CTNND2  
CTNNBL1  
CTNNBIP1  
CTNNAL1  
CTNNA1  
CTLA4  
CTHRC1  
CTDSPL2  
CTDSPL  
CTDSP2  
CTDSP1  
CTDP1  
CTDNEP1  
CTCF  
CTBP2  
CTBP1  
CT83  
CT55

CT45A10  
CSTL1  
CSTF3  
CSTF2  
CSTF1  
CSTB  
CST9L  
CST8  
CST6  
CST3  
CST2  
CST1  
CSRNP2  
CSPP1  
CSPG5  
CSPG4  
CSNK2B  
CSNK2A2  
CSNK2A1  
CSNK1G2  
CSNK1G1  
CSNK1E  
CSNK1D  
CSKMT  
CSK  
CSF1  
CSE1L  
CS  
CRYZL1  
CRYGS  
CRYBG2  
CRYBB3  
CRYBB2  
CRYBA1  
CRTC3  
CRTC2  
CRTC1  
CRTAP  
CROCC  
CRNKL1  
CRNDE  
CRMP1  
CRLF3  
CRLF1



CRKL  
CRISP2  
CRIPT  
CRIP1  
CRHR2  
CRELD2  
CRELD1  
CREG2  
CREB5  
CREB3L4  
CREB3L2  
CREB3  
CREB1  
CRCP  
CRB2  
CRAMP1  
CRACR2B  
CRACDL  
CRABP2  
CPXM1  
CPVL  
CPT1C  
CPT1B  
CPSF7  
CPSF6  
CPSF4L  
CPSF4  
CPSF3  
CPSF2  
CPSF1  
CPNE9  
CPNE7  
CPNE5  
CPNE2  
CPNE1  
CPLX2  
CPLX1  
CPEB1  
CPD  
CPA6  
CPA2  
COX8A  
COX7C  
COX7B

COX7A2L  
COX7A2  
COX6C  
COX6B2  
COX6B1  
COX6A1  
COX5B  
COX5A  
COX4I2  
COX4I1  
COX20  
COX19  
COX17  
COX16  
COX14  
COX11  
COX10  
CORO7  
CORO6  
CORO2A  
CORO1C  
CORO1B  
COQ8B  
COQ7  
COQ5  
COQ4  
COQ3  
COPZ1  
COPS9  
COPS8  
COPS7B  
COPS7A  
COPS6  
COPS5  
COPS4  
COPS3  
COPS2  
COPRS  
COPG2  
COPG1  
COPE  
COPB2  
COPB1  
COPA

COP1  
COMTD1  
COMP  
COMMD9  
COMMD8  
COMMD7  
COMMD6  
COMMD5  
COMMD4  
COMMD3  
COMMD2  
COMMD1  
COLQ  
COLGALT2  
COLGALT1  
COLEC12  
COLCA2  
COLCA1  
COL9A2  
COL9A1  
COL7A1  
COL5A2  
COL4A2  
COL4A1  
COL2A1  
COL27A1  
COL22A1  
COL11A2  
COL11A1  
COIL  
COG8  
COG7  
COG5  
COG4  
COG2  
COG1  
COCH  
COASY  
COA8  
COA7  
COA6  
COA5  
COA4  
COA3

COA1  
CNTROB  
CNTRL  
CNTNAP5  
CNTNAP1  
CNTD1  
CNPY4  
CNPY3  
CNPY2  
CNPPD1  
CNP  
CNOT9  
CNOT8  
CNOT6  
CNOT4  
CNOT3  
CNOT2  
CNOT11  
CNOT10  
CNNM4  
CNNM2  
CNNM1  
CNN2  
CNIH4  
CNIH3  
CNIH2  
CNGB1  
CNGA3  
CNFN  
CNBD2  
CMTR1  
CMTM7  
CMTM4  
CMTM3  
CMTM1  
CMSS1  
CMIP  
CMC2  
CMC1  
CLUL1  
CLUAP1  
CLTB  
CLTA  
CLSTN3

CLSTN1  
CLSPN  
CLPTM1L  
CLPTM1  
CLPSL2  
CLPSL1  
CLPP  
CLP1  
CLNS1A  
CLN6  
CLN3  
CLLU1-AS1  
CLK4  
CLK3  
CLK2  
CLK1  
CLIP2  
CLIC3  
CLIC1  
CLHC1  
CLEC4A  
CLEC2L  
CLEC2D  
CLEC18C  
CLEC18B  
CLEC18A  
CLDND2  
CLDN6  
CLDN18  
CLCNKB  
CLCNKA  
CLCN7  
CLCN6  
CLCN2  
CLCF1  
CLBA1  
CLASRP  
CKS2  
CKS1B  
CKMT1B  
CKMT1A  
CKM  
CKLF-CMTM1  
CKLF

CKB  
CKAP5  
CKAP4  
CKAP2L  
CKAP2  
CIZ1  
CITED4  
CITED1  
CIT  
CISD1  
CIRBP  
CIR1  
CIP2A  
CINP  
CILP2  
CIC  
CIB2  
CIB1  
CIART  
CIAPIN1  
CIAO3  
CIAO2B  
CIAO1  
CHURC1-FNTB; FNTB  
CHUK  
CHTOP  
CHTF18  
CHST6  
CHST2  
CHST14  
CHST12  
CHST11  
CHST10  
CHST1  
CHRNG  
CHRNA2  
CHRNA9  
CHRNA7  
CHRNA5  
CHRNA10  
CHRNA1  
CHRM1  
CHRD  
CHRA1

CHPF2  
CHORDC1  
CHMP7  
CHMP6  
CHMP4C  
CHMP4B  
CHMP4A  
CHMP3  
CHMP2B  
CHMP2A  
CHMP1A  
CHML  
CHKB  
CHKA  
CHID1  
CHI3L2  
CHGB  
CHGA  
CHFR  
CHERP  
CHEK2  
CHEK1  
CHD8  
CHD7  
CHD5  
CHD4  
CHD3  
CHD2  
CHD1L  
CHCHD7  
CHCHD6  
CHCHD5  
CHCHD4  
CHCHD3  
CHCHD2  
CHCHD1  
CHAF1B  
CHAF1A  
CGRRF1  
CGREF1  
CGGBP1  
CGB7  
CGAS  
CFLAR

CFL1  
CFDP1  
CFAP92  
CFAP77  
CFAP73  
CFAP65  
CFAP61  
CFAP53  
CFAP45  
CFAP44  
CFAP43  
CFAP410  
CFAP36  
CFAP300  
CFAP298  
CFAP157  
CFAP100  
CETN3  
CETN2  
CERS5  
CERS3  
CERK  
CERCAM  
CER1  
CEP95  
CEP89  
CEP85  
CEP83  
CEP78  
CEP72  
CEP68  
CEP63  
CEP55  
CEP41  
CEP350  
CEP295NL  
CEP295  
CEP290  
CEP250  
CEP192  
CEP19  
CEP170B  
CEP170  
CEP164



CEP162  
CEP152  
CEP135  
CEP131  
CEP126  
CEP112  
CENPX  
CENPW  
CENPV  
CENPU  
CENPT  
CENPS  
CENPQ  
CENPP  
CENPO  
CENPN  
CENPM  
CENPL  
CENPK  
CENPJ  
CENPI  
CENPH  
CENPF  
CENPE  
CENPB  
CENPA  
CEND1  
CELSR3  
CELF4  
CELF3  
CELA3B  
CEL  
CEBPZOS  
CEBPZ  
CEBPG  
CEACAM7  
CEACAM19  
CDYL  
CDX2  
CDV3  
CDT1  
CDS2  
CDRT4  
CDR2L

CDPF1  
CDON  
CDKN3  
CDKN2D  
CDKN2C  
CDKN2B  
CDKN2AIPNL  
CDKN2A  
CDKL4  
CDKL3  
CDKAL1  
CDK9  
CDK8  
CDK7  
CDK5RAP3  
CDK5RAP2  
CDK5RAP1  
CDK5R2  
CDK5R1  
CDK5  
CDK4  
CDK3  
CDK2AP2  
CDK2AP1  
CDK20  
CDK2  
CDK19  
CDK16  
CDK13  
CDK12  
CDK11B  
CDK11A  
CDK10  
CDK1  
CDIPT  
CDHR4  
CDHR3  
CDH9  
CDH8  
CDH6  
CDH3  
CDH24  
CDH18  
CDH16

CDH10  
CDCP2  
CDCP1  
CDCA8  
CDCA7L  
CDCA7  
CDCA5  
CDCA4  
CDCA3  
CDCA2  
CDC7  
CDC6  
CDC45  
CDC42SE2  
CDC42SE1  
CDC42EP5  
CDC42EP4  
CDC42EP2  
CDC42EP1  
CDC42  
CDC37  
CDC34  
CDC27  
CDC26  
CDC25C  
CDC25B  
CDC25A  
CDC23  
CDC20B  
CDC20  
CDC16  
CDC123  
CDAN1  
CD99  
CD83  
CD79B  
CD72  
CD70  
CD7  
CD68  
CD63  
CD58  
CD3EAP  
CD3D

CD34  
CD320  
CD300LF  
CD2BP2  
CD2AP  
CD276  
CD248  
CD24  
CD200  
CD1A  
CD177  
CD151  
CD101  
CCZ1B  
CCZ1  
CCT8  
CCT7  
CCT6A  
CCT5  
CCT4  
CCT3  
CCT2  
CCSAP  
CCRL2  
CCR3  
CCR10  
CCNY  
CCNT2  
CCNT1  
CCNQ  
CCNO  
CCNL2  
CCNL1  
CCNJL  
CCNJ  
CCNI2  
CCNH  
CCNG2  
CCNF  
CCNE2  
CCNE1  
CCND3  
CCND2  
CCNB3

CCNB2  
CCNB1  
CCNA2  
CCM2  
CCL26  
CCL20  
CCKBR  
CCIN  
CCHCR1  
CCER2  
CCDC97  
CCDC96  
CCDC93  
CCDC92  
CCDC91  
CCDC9  
CCDC88C  
CCDC88B  
CCDC88A  
CCDC86  
CCDC85B  
CCDC84  
CCDC81  
CCDC78  
CCDC77  
CCDC74B  
CCDC74A  
CCDC73  
CCDC71  
CCDC66  
CCDC65  
CCDC61  
CCDC6  
CCDC59  
CCDC58  
CCDC57  
CCDC51  
CCDC50  
CCDC43  
CCDC40  
CCDC36  
CCDC34  
CCDC32  
CCDC30

CCDC28B  
CCDC28A-AS1  
CCDC24  
CCDC22  
CCDC200  
CCDC192  
CCDC191  
CCDC189  
CCDC188  
CCDC185  
CCDC183  
CCDC181  
CCDC180  
CCDC18  
CCDC174  
CCDC17  
CCDC167  
CCDC166  
CCDC163  
CCDC159  
CCDC157  
CCDC154  
CCDC153  
CCDC150  
CCDC149  
CCDC148  
CCDC142  
CCDC14  
CCDC138  
CCDC137  
CCDC136  
CCDC134  
CCDC130  
CCDC127  
CCDC124  
CCDC122  
CCDC120  
CCDC12  
CCDC116  
CCDC115  
CCDC114  
CCDC112  
CCDC107  
CCDC102B

CCDC102A  
CCAR2  
CCAR1  
CC2D2A  
CC2D1B  
CC2D1A  
CBY2  
CBY1  
CBX8  
CBX6  
CBX5  
CBX4  
CBX3  
CBX2  
CBX1  
CBWD6  
CBWD5  
CBWD3; CBWD5  
CBWD2  
CBWD1  
CBR3  
CBLL1  
CBL  
CBFB  
CBFA2T2  
CBARP  
CAVIN4  
CAVIN3  
CATSPERD  
CATSPER3  
CATSPER2  
CATSPER1  
CASTOR3  
CASQ1  
CASP8  
CASP6  
CASP5  
CASP4  
CASP3  
CASP2  
CASKIN2  
CASKIN1  
CASC3  
CARS2

CARS1  
CARMIL2  
CARM1  
CARD9  
CARD8  
CARD19  
CARD14  
CARD10  
CAPZB  
CAPZA2  
CAPZA1  
CAPSL  
CAPS  
CAPRIN2  
CAPRIN1  
CAPNS1  
CAPN9  
CAPN8  
CAPN2  
CAPN15  
CAPN12  
CAPN10  
CAPN1  
CAPG  
CAP1  
CANX  
CANT1  
CAND1  
CAMTA1  
CAMSAP3  
CAMSAP2  
CAMSAP1  
CAMLG  
CAMKV  
CAMKMT  
CAMKK2  
CAMKK1  
CAMK2G  
CALY  
CALU  
CALR  
CALML6  
CALM3  
CALM2



CALHM3  
CALB2  
CAGE1  
CADPS  
CAD  
CACYBP  
CACUL1  
CACTIN  
CACNG8  
CACNG4  
CACNB4  
CACNB3  
CACNB1  
CACNA2D4  
CACNA2D3  
CACNA2D2  
CACNA1G  
CACNA1F  
CACNA1E  
CACNA1B  
CACNA1A  
CACFD1  
CABYR  
CABP7  
CABP1  
CABLES2  
CABIN1  
CAB39L  
CA9  
CA7  
CA12  
CA11  
C9orf85  
C9orf50  
C9orf40  
C9orf163  
C9orf16  
C9orf153  
C9orf139  
C9orf116  
C8orf87  
C8orf82  
C8orf76  
C8orf58

C8orf44  
C8orf33  
C7orf61  
C7orf57  
C7orf50  
C7orf31  
C7orf26  
C7orf25  
C6orf89  
C6orf62  
C6orf52  
C6orf47  
C6orf226  
C6orf223  
C6orf163  
C6orf136  
C6orf132  
C5orf66  
C5orf63  
C5orf47  
C5orf46  
C5orf34  
C5orf22  
C4orf51  
C4orf48  
C4orf47  
C4orf46  
C3orf86  
C3orf62  
C3orf52  
C3orf38  
C3orf35  
C3orf33  
C3orf22  
C3orf14  
C2orf92  
C2orf76  
C2orf68  
C2orf66  
C2orf50  
C2orf49  
C2orf15  
C2CD6  
C2CD5

C2CD3  
C2CD2L  
C22orf46  
C22orf42  
C22orf39  
C22orf34  
C22orf24  
C22orf23  
C21orf58  
C20orf96  
C20orf27  
C20orf204  
C20orf203  
C20orf202  
C20orf197  
C20orf194  
C20orf144  
C1QTNF8  
C1QTNF6  
C1QTNF12  
C1QL4  
C1QBP  
C1orf56  
C1orf54  
C1orf52  
C1orf50  
C1orf43  
C1orf35  
C1orf229  
C1orf216  
C1orf198  
C1orf194  
C1orf174  
C1orf159  
C1orf146  
C1orf131  
C1orf127  
C1orf122  
C1orf116  
C1orf112  
C1orf109  
C1orf100  
C1GALT1  
C19orf84

C19orf81  
C19orf67  
C19orf57  
C19orf54  
C19orf53  
C19orf48  
C19orf47  
C19orf44  
C19orf33  
C19orf25  
C19orf18  
C18orf54  
C18orf21  
C17orf99  
C17orf80  
C17orf75  
C17orf58  
C17orf50  
C17orf49  
C17orf100  
C16orf91  
C16orf90  
C16orf74  
C15orf65  
C15orf61  
C15orf56  
C15orf48  
C15orf41  
C15orf40  
C15orf39  
C14orf93  
C14orf39  
C14orf119  
C12orf76  
C12orf75  
C12orf73  
C12orf65  
C12orf57  
C12orf56  
C12orf49  
C12orf45  
C12orf43  
C12orf4  
C11orf98

C11orf95  
C11orf91  
C11orf88  
C11orf80  
C11orf68  
C11orf58  
C11orf49  
C11orf45  
C11orf16  
C10orf95  
C10orf88  
C10orf62  
C10orf55  
C10orf126  
BZW2  
BYSL  
BUD31  
BUD23  
BUD13  
BUB3  
BUB1B  
BUB1  
BTRC  
BTNL10  
BTN2A1  
BTN1A1  
BTG3  
BTG1  
BTF3L4  
BTF3  
BTBD9  
BTBD7  
BTBD3  
BTBD2  
BTBD17  
BTBD10  
BTBD1  
BSPRY  
BSND  
BSG  
BRSK2  
BRSK1  
BRS3  
BRPF1

BROX  
BRMS1  
BRK1  
BRIX1  
BRICD5  
BRI3BP  
BRI3  
BRF1  
BRD9  
BRD8  
BRD7  
BRD4  
BRD3OS  
BRD2  
BRD1  
BRCA2  
BRCA1  
BRAT1  
BRAP  
BRAF  
BPNT1  
BPIFB6  
BPIFB4  
BPIFB2  
BPIFB1  
BPIFA2  
BPIFA1  
BPGM  
BORCS8  
BORCS6  
BORCS5  
BORA  
BOP1  
BOLL  
BOLA3  
BOLA2-SMG1P6  
BOLA2B  
BOLA1  
BOD1  
BNIPL  
BNIP1  
BMT2  
BMS1  
BMPR1A

BMP8B  
BMP8A  
BMP7  
BMF  
BLZF1  
BLVRA  
BLOC1S5  
BLOC1S4  
BLOC1S3  
BLOC1S2  
BLOC1S1  
BLMH  
BLM  
BIRC7  
BIRC5  
BIN1  
BIK  
BID  
BICRA  
BICDL1  
BICD2  
BICD1  
BICC1  
BHMGI  
BGLAP  
BFSP2  
BFSP1  
BFAR  
BEX4  
BEX3  
BEX2  
BET1L  
BET1  
BEST4  
BEST3  
BEST1  
BEND3  
BECN2  
BDKRB1  
BCS1L  
BCR  
BCORL1  
BCLAF3  
BCLAF1

BCL9  
BCL7C  
BCL7B  
BCL7A  
BCL6  
BCL3  
BCL2L2-PABPN1  
BCL2L2  
BCL2L15  
BCL2L14  
BCL2L12  
BCL2L1  
BCL11A  
BCL10  
BCDIN3D  
BCCIP  
BCAT1  
BCAS4  
BCAS1  
BCAR1  
BCAP31  
BCAP29  
BCAN  
BCAM  
BBS7  
BBS4  
BBS1  
BBIP1  
BBC3  
BAZ2A  
BAZ1B  
BAZ1A  
BAX  
BATF3  
BATF  
BARX2  
BARHL1  
BARD1  
BAP1  
BANP  
BANF2  
BANF1  
BAMBI  
BAK1



BAIAP2L2  
BAIAP2L1  
BAHD1  
BAG6  
BAG5  
BAG3  
BAG2  
BAG1  
BAD  
BABAM2  
BABAM1  
B9D2  
B9D1  
B4GALT7  
B4GALT5  
B4GALT4  
B4GALT3  
B4GALT2  
B4GALNT4  
B4GALNT1  
B3GNTL1  
B3GNT8  
B3GNT4  
B3GNT3  
B3GAT3  
B3GALT6  
B3GALT4  
B3GALNT1  
AZIN1  
AXIN1  
AXDND1  
AVPR1B  
AVL9  
AVEN  
AURKC  
AURKB  
AURKAIP1  
AURKA  
AUP1  
AUNIP  
ATXN7L3B  
ATXN7L3  
ATXN7L2  
ATXN2L

ATXN2  
ATXN10  
ATRAID  
ATR  
ATPSCKMT  
ATPAF2  
ATP9A  
ATP8A2  
ATP6V1H  
ATP6V1G3  
ATP6V1G1  
ATP6V1FNB  
ATP6V1F  
ATP6V1E2  
ATP6V1E1  
ATP6V1D  
ATP6V1C2  
ATP6V1C1  
ATP6V1B1  
ATP6V0E1  
ATP6V0D2  
ATP6V0D1  
ATP6V0B  
ATP6V0A4  
ATP6V0A2  
ATP6V0A1  
ATP6AP2  
ATP6AP1L  
ATP6AP1  
ATP5PO  
ATP5PD  
ATP5PB  
ATP5MPL  
ATP5MG  
ATP5MF-PTCD1  
ATP5MF  
ATP5ME  
ATP5MD  
ATP5MC3  
ATP5MC2  
ATP5MC1  
ATP5F1E  
ATP5F1D  
ATP5F1C

ATP5F1B  
ATP2C2  
ATP2B1  
ATP2A1  
ATP1B3  
ATP1B1  
ATP1A4  
ATP1A1  
ATP13A2  
ATP13A1  
ATN1  
ATIC  
ATG9B  
ATG9A  
ATG7  
ATG4D  
ATG4B  
ATG3  
ATG16L2  
ATG16L1  
ATG14  
ATG13  
ATG12  
ATG101  
ATG10  
ATF7; NPFF  
ATF7  
ATF6B  
ATF4  
ATF2  
ATCAY  
ATAT1  
ATAD5  
ATAD3B  
ATAD3A  
ATAD2  
ATAD1  
ASXL1  
ASTE1  
ASRGL1  
ASPSCR1  
ASPM  
ASPHD2  
ASPHD1

ASNSD1  
ASNS  
ASMT  
ASIC4  
ASIC3  
ASIC1  
ASF1B  
ASF1A  
ASCL5  
ASCL2  
ASCC2  
ASCC1  
ASB6  
ASB3  
ASB16  
ASB14  
ASB1  
ASAP1  
ARVCF  
ARV1  
ARTN  
ART3  
ARSI  
ARSG  
ARRDC5  
ARRDC2  
ARRDC1  
ARRB2  
ARRB1  
ARR3  
ARPP19  
ARPIN  
ARPC5L  
ARPC5  
ARPC4  
ARPC3  
ARPC2  
ARPC1B  
ARPC1A  
ARNTL2  
ARNT2  
ARMH3  
ARMC9  
ARMC8

ARMC7  
ARMC3  
ARMC2  
ARMC12  
ARMC10  
ARMC1  
ARL9  
ARL8B  
ARL8A  
ARL6IP6  
ARL6IP4  
ARL4C  
ARL4A  
ARL3  
ARL2  
ARL17A  
ARL16  
ARL14EP  
ARL10  
ARL1  
ARIH2OS  
ARIH2  
ARID5B  
ARID5A  
ARID4B  
ARID3B  
ARID3A  
ARID2  
ARHGEF7  
ARHGEF40  
ARHGEF39  
ARHGEF38  
ARHGEF33  
ARHGEF3  
ARHGEF25  
ARHGEF2  
ARHGEF19  
ARHGEF11  
ARHGEF1  
ARHGDIG  
ARHGDIB  
ARHGDIA  
ARHGAP45  
ARHGAP40

ARHGAP4  
ARHGAP39  
ARHGAP33  
ARHGAP27  
ARHGAP26  
ARHGAP22  
ARHGAP19  
ARHGAP18  
ARHGAP17  
ARHGAP12  
ARHGAP11A  
ARHGAP1  
ARGLU1  
ARFRP1  
ARFIP2  
ARFGEF3  
ARFGEF1  
ARFGAP3  
ARFGAP2  
ARFGAP1  
ARF6  
ARF5  
ARF4  
ARF3  
ARF1  
AREL1  
ARAP1  
APTX  
APRT  
APPL2  
APPL1  
APOO  
APOBR  
APOBEC2  
APLP1  
APLN  
APIP  
APH1B  
APH1A  
APEX2  
APEX1  
APEH  
APCDD1L  
APBB1

APBA3  
AP5Z1  
AP5S1  
AP5B1  
AP4M1  
AP4E1  
AP4B1  
AP3S1  
AP3M2  
AP3M1  
AP3D1  
AP3B2  
AP3B1  
AP2S1  
AP2M1  
AP2B1  
AP2A2  
AP2A1  
AP1S3  
AP1S2  
AP1S1  
AP1M2  
AP1M1  
AP1G2  
AP1B1  
AOPEP  
ANXA9  
ANXA5  
ANXA2R  
ANXA2  
ANXA11  
ANTKMT  
ANP32E  
ANP32B  
ANP32A  
ANO9  
ANO7  
ANO4  
ANO10  
ANLN  
ANKZF1  
ANKS6  
ANKS3  
ANKS1A

ANKRD9  
ANKRD7  
ANKRD65  
ANKRD61  
ANKRD54  
ANKRD52  
ANKRD49  
ANKRD40  
ANKRD39  
ANKRD36C  
ANKRD36B  
ANKRD36  
ANKRD34A  
ANKRD27  
ANKRD26  
ANKRD23  
ANKRD2  
ANKRD18B  
ANKRD16  
ANKRD13D  
ANKRD13B  
ANKRD13A  
ANKRD11  
ANKRD10  
ANKRD1  
ANKMY2  
ANKMY1  
ANKLE2  
ANKLE1  
ANKK1  
ANKHD1-EIF4EBP3  
ANKHD1  
ANKDD1B  
ANKDD1A  
ANKAR  
ANGPTL5  
ANGPT2  
ANGEL2  
ANGEL1  
ANAPC7  
ANAPC5  
ANAPC4  
ANAPC2  
ANAPC16



ANAPC15  
ANAPC13  
ANAPC11  
ANAPC1  
AMZ2  
AMPD3  
AMPD2  
AMMECR1L  
AMMECR1  
AMIGO3  
AMH  
AMDHD2  
AMD1  
AMBRA1  
ALYREF  
ALX4  
ALX1  
ALS2CL  
ALPP  
ALPK3  
ALOXE3  
ALOX12B  
ALMS1  
ALKBH6  
ALKBH4  
ALKBH2  
ALKBH1  
ALG9  
ALG8  
ALG6  
ALG5  
ALG3  
ALG2  
ALG1L2  
ALG14  
ALG13  
ALG1  
ALDOA  
ALDH3B2  
ALDH3B1  
ALDH18A1  
ALDH16A1  
ALCAM  
AKT1S1

AKR1C3  
AKNAD1  
AKIRIN2  
AKIP1  
AKAP8L  
AKAP8  
AKAP17A  
AKAP10  
AK9  
AK6  
AJM1  
AIRE  
AIP  
AIMP2  
AIMP1  
AIFM3  
AIFM2  
AICDA  
AHSA1  
AHCY  
AHCTF1  
AGTRAP  
AGRN  
AGR2  
AGPS  
AGPAT4  
AGPAT1  
AGO2  
AGK  
AGFG1  
AGER  
AGBL5  
AGBL3  
AGAP9  
AGAP6  
AGAP4  
AGAP3  
AGAP2  
AGAP1  
AFTPH  
AFP  
AFG1L  
AFAP1L1  
AFAP1

AEN  
AEBP2  
ADSS2  
ADSL  
ADRM1  
ADRB3  
ADRA2C  
ADRA1D  
ADPRS  
ADPRM  
ADPGK  
ADORA2B  
ADORA1  
ADO  
ADNP2  
ADNP  
ADM5  
ADM2  
ADM  
ADIPOR1  
ADGRL1  
ADGRG1  
ADGRF4  
ADGRF2  
ADGRE5  
ADGRD2  
ADGRB2  
ADGRB1  
ADD3  
ADD2  
ADD1  
ADCY6  
ADCY2  
ADCK5  
ADCK2  
ADCK1  
ADAT3  
ADAT2  
ADAR  
ADAP1  
ADAMTS9  
ADAMTS7  
ADAMTS6  
ADAMTS16

ADAMTS14  
ADAM9  
ADAM8  
ADAM32  
ADAM22  
ADAM18  
ADAM15  
ADAM12  
ADAM11  
ADAM10  
ADA  
ACYP1  
ACVRL1  
ACVR2B  
ACTR8  
ACTR6  
ACTR5  
ACTR3B  
ACTR3  
ACTR1B  
ACTR1A  
ACTR10  
ACTN4  
ACTN3  
ACTN1  
ACTL8  
ACTL6A  
ACTL10  
ACTG2  
ACTG1  
ACTBL2  
ACTB  
ACTA1  
ACSS1  
ACSL4  
ACSL3  
ACSBG2  
ACSBG1  
ACRV1  
ACP6  
ACP4  
ACP3  
ACPI  
ACOXL

ACOT9  
ACOT8  
ACOT7  
ACLY  
ACIN1  
ACER3  
ACE  
ACD  
ACBD6  
ACBD3  
ACAP3  
ACAN  
ACAD9  
ACACA  
ABTB1  
ABT1  
ABRAXAS2  
ABRAXAS1  
ABRA  
ABR  
ABLIM2  
ABL2  
ABL1  
ABITRAM  
ABI2  
ABI1  
ABHD8  
ABHD4  
ABHD3  
ABHD17C  
ABHD17A  
ABHD14A  
ABHD12  
ABHD11  
ABCF3  
ABCF2  
ABCF1  
ABCE1  
ABCD1  
ABCC8  
ABCC5  
ABCC4  
ABCC10  
ABCC1

ABCB9  
 ABCB8  
 ABCB6  
 ABCB5  
 ABCA7  
 ABCA4  
 ABCA3  
 ABCA12  
 AATK  
 AATF  
 AARSD1  
 AARS2  
 AARS1  
 AARD  
 AAR2  
 AANAT  
 AAMP  
 AAK1  
 AAGAB  
 AACS  
 AAAS  
 A4GNT  
 A4GALT

**SNHG17 negative-related genes in TCGA**

ZNF385B  
 ZMYND12  
 ZG16  
 ZFP1  
 ZBTB16  
 XDH  
 XAF1  
 WNK3  
 VWA8  
 VIPR1  
 USH2A  
 UROC1  
 UPP2  
 UPB1  
 UGT3A1  
 UGT2B7  
 UGT2B4

**Upregulated genes in RNA-seq data**

AC009086.2  
 AL158066.1  
 AC138696.1  
 AC068234.1  
 AC006547.3  
 ZFP91-CNTF  
 BORCS7-ASMT  
 MAT1A  
 BIVM-ERCC5  
 TBC1D3I  
 COL25A1  
 LINC02015  
 MMP23B  
 STRC  
 AC022028.2  
 C1QTNF9  
 PAQR9

**Overlap**

MAT1A  
 COL25A1  
 HSD17B13  
 DIO1  
 TDO2  
 BMPER  
 ABCB4  
 RASGEF1B  
 C4orf19  
 DUSP10  
 FGB  
 RDH5  
 TSLP  
 PDK4  
 RUNDC3B  
 SERPING1  
 NTN3

|          |              |       |
|----------|--------------|-------|
| UGT2B17  | TRIM6-TRIM34 | RSPO3 |
| UGT2B15  | AC005154.6   | DLG2  |
| UGT2B10  | ABCA17P      |       |
| UGT1A9   | AC009927.1   |       |
| UGT1A4   | OLFML3       |       |
| UGT1A3   | NPPC         |       |
| UGT1A1   | DHH          |       |
| UGP2     | LINGO1       |       |
| UBXN10   | PPFIA2       |       |
| TUBE1    | HULC         |       |
| TTR      | BTN1A1       |       |
| TTPA     | AL139039.1   |       |
| TTC39B   | AL445483.1   |       |
| TTC36    | CLEC20A      |       |
| TTBK1    | AP001107.5   |       |
| TSLP     | TONSL-AS1    |       |
| TSKU     | AL136309.2   |       |
| TRPM8    | GPR34        |       |
| TRPC5    | AC008982.1   |       |
| TRO      | AL713999.1   |       |
| TRIM22   | SLC4A10      |       |
| TREH     | ZNF98        |       |
| TRANK1   | RPL12P28     |       |
| TPPP2    | PDCD6IPP1    |       |
| TOB1     | AP003419.4   |       |
| TNXB     | AC009336.3   |       |
| TMPRSS6  | CLPSL2       |       |
| TMOD1    | LINC01885    |       |
| TMEM82   | SORCS1       |       |
| TMEM47   | AC068594.1   |       |
| TMEM25   | AC023824.7   |       |
| TMEM220  | AC100803.1   |       |
| TMEM192  | IL1R2        |       |
| TMEM131L | AP001062.3   |       |
| TMEM100  | CCDC197      |       |
| TM6SF2   | SMTNL1       |       |
| TLR4     | IGFBP7-AS1   |       |
| TLR3     | AC025165.1   |       |
| TLCD4    | MOBP         |       |
| TIGD2    | TMEM150C     |       |
| TIAM1    | AC009097.1   |       |
| THRSP    | DHRS9        |       |
| TFR2     | AC005034.4   |       |
| TF       | TRIM60P18    |       |

|          |              |
|----------|--------------|
| TEX26    | AC091868.1   |
| TERB2    | TEKT3        |
| TEK      | AC025287.1   |
| TDO2     | COL6A5       |
| TCTEX1D1 | CCDC54       |
| TBX20    | AC005052.1   |
| TAT      | AC100788.2   |
| TAS2R60  | NKAIN4       |
| TAPT1    | AC145423.2   |
| TANGO6   | CATSPERD     |
| SYTL5    | TGM7         |
| SYT9     | AC145285.4   |
| SYT10    | AC023644.1   |
| SYNPO2   | FBXL7        |
| SYNE1    | HSD17B13     |
| SUOX     | AL591475.1   |
| SULT2A1  | TRIM63       |
| SULT1B1  | AC084782.3   |
| SUCNR1   | LY96         |
| SUCLG2   | CCDC81       |
| STX1B    | AC012512.1   |
| STEAP4   | AC021549.1   |
| STEAP3   | MAGEB3       |
| STBD1    | PSMD4P1      |
| STARD5   | HSPB2        |
| STAB2    | HIST1H1T     |
| ST8SIA6  | HOXA11-AS1_2 |
| ST6GAL1  | AC005096.1   |
| ST3GAL6  | RPL12P42     |
| SRL      | SOX5         |
| SRD5A2   | CD80         |
| SRD5A1   | SLAMF7       |
| SPTBN2   | AC244102.1   |
| SPRYD4   | AL359551.1   |
| SPP2     | AL161719.1   |
| SPDYC    | AC113607.1   |
| SPATA18  | AC026464.2   |
| SPACA7   | LINC02404    |
| SOWAHB   | AL158196.1   |
| SORL1    | COX6CP2      |
| SORD     | AC113139.1   |
| SORBS2   | MIAT_exon5_3 |
| SOCS2    | GPR18        |
| SMIM14   | ZRANB2-AS1   |



|          |            |
|----------|------------|
| SMARCA2  | AP002812.1 |
| SLITRK3  | AL359853.2 |
| SLCO2B1  | CPLX2      |
| SLCO1B1  | ANKRD62    |
| SLC9B2   | SNORD16    |
| SLC7A2   | SIGLEC9    |
| SLC6A13  | AC010240.2 |
| SLC6A12  | AC093901.1 |
| SLC6A1   | AC009163.3 |
| SLC51A   | AC100788.1 |
| SLC4A4   | AC107982.1 |
| SLC47A1  | AC010997.3 |
| SLC46A3  | AC064801.1 |
| SLC41A2  | PRLR       |
| SLC39A8  | DIO1       |
| SLC39A14 | SNORA58B   |
| SLC38A4  | CCDC177    |
| SLC38A3  | SNORA1     |
| SLC35D1  | AP001527.1 |
| SLC34A1  | AC090617.6 |
| SLC31A1  | AC011489.1 |
| SLC30A4  | FYB1       |
| SLC30A1  | RAB28P5    |
| SLC2A9   | AL645465.1 |
| SLC2A2   | LINC02009  |
| SLC2A12  | TUBG1P     |
| SLC28A1  | AL450326.1 |
| SLC27A5  | RGS4       |
| SLC27A2  | CLDN14     |
| SLC25A47 | MYH16      |
| SLC25A34 | AC087190.4 |
| SLC25A25 | PLA1A      |
| SLC25A20 | MAGI2-AS3  |
| SLC25A15 | AC012254.2 |
| SLC22A7  | RHCG       |
| SLC22A25 | RN7SL832P  |
| SLC22A10 | AL354919.2 |
| SLC22A1  | IGDCC4     |
| SLC1A2   | MAGEB18    |
| SLC1A1   | HSPD1P11   |
| SLC17A4  | HMGA1P8    |
| SLC17A2  | AP002840.2 |
| SLC17A1  | NME9       |
| SLC16A2  | TNFRSF14   |

|           |              |
|-----------|--------------|
| SLC13A5   | VCX          |
| SLC10A1   | PAEP         |
| SHMT1     | TP63         |
| SHE       | AC026471.6   |
| SHBG      | AC020907.1   |
| SH3D19    | AC037198.3   |
| SFXN1     | PNMA6A       |
| SETD7     | KLHL10       |
| SERTM2    | NRIP3        |
| SERPING1  | AC110015.1   |
| SERPINF2  | RN7SL657P    |
| SERPIND1  | FRMPD4       |
| SERPINC1  | RHAG         |
| SERPINA7  | AC004637.1   |
| SERPINA6  | AC021028.1   |
| SERPINA4  | PDXDC2P      |
| SERPINA11 | LINC01293    |
| SERPINA10 | AC121761.2   |
| SEPSECS   | HTR3A        |
| SELP      | AC126603.1   |
| SELENOP   | ABHD14A-ACY1 |
| SELENBP1  | CLVS1        |
| SELE      | DCLK1        |
| SEC24D    | HOXD4        |
| SEC14L3   | SCN2A        |
| SEC14L2   | AL049830.3   |
| SDS       | AC245096.1   |
| SDC1      | HLA-J        |
| SCP2      | PLEKHB1      |
| SC5D      | AL049697.1   |
| SARDH     | AC138028.6   |
| SAR1B     | DLGAP3       |
| SALL1     | AC015818.2   |
| SAA4      | AC106820.3   |
| SAA2-SAA4 | TNFRSF14-AS1 |
| SAA2      | AC104452.1   |
| SAA1      | CATSPERG     |
| RUNDC3B   | CELF5        |
| RTP3      | AC120498.9   |
| RTL4      | AGTR1        |
| RSPO3     | AC007731.5   |
| RORC      | SOX21-AS1    |
| RORA      | BHLHB9       |
| ROPN1B    | TDO2         |

|          |            |
|----------|------------|
| RNF152   | RN7SL751P  |
| RNF144B  | MYO7A      |
| RNF125   | BMS1P4     |
| RNASE4   | PACSIN1    |
| RMDN2    | GAGE12H    |
| RIPOR3   | AL117329.1 |
| RIDA     | CRISPLD1   |
| RHOB     | LINC02274  |
| RHCE     | AC110597.3 |
| RGS7BP   | ZNF724     |
| RGN      | LINC02535  |
| RFPL1    | SCHIP1     |
| RETREG1  | AC122129.1 |
| REPS2    | ELFN2      |
| REEP6    | AC005225.5 |
| RDH5     | AL162258.2 |
| RDH16    | CCNT2-AS1  |
| RD3L     | AREG       |
| RCAN1    | HMCN1      |
| RBP5     | AC090970.3 |
| RBP4     | P2RX2      |
| RASGEF1B | PPP1R36    |
| RAPH1    | C11orf96   |
| RAPGEF4  | ZNF624     |
| RAPGEF2  | MANEA-AS1  |
| RANBP3L  | AC002470.1 |
| RAMP3    | AC245060.5 |
| QDPR     | DDO        |
| PZP      | CYP1B1     |
| PXMP2    | ZNF658B    |
| PTPRB    | CDRT4      |
| PTGR1    | SYCE2      |
| PSD3     | AL353743.4 |
| PRRG4    | CDK14      |
| PROZ     | RASGRF2    |
| PROS1    | PRKG1      |
| PRKAG2   | MAPK8IP2   |
| PRG4     | AC100803.2 |
| PRAMEF33 | AC096887.1 |
| PRAMEF10 | DUX4L27    |
| PPP4R4   | RBBP8NL    |
| PPP1R3B  | AL591684.2 |
| PPL      | AJ271736.1 |
| PPARGC1A | LINC02029  |

|            |            |
|------------|------------|
| PPARA      | LRRC37A11P |
| PON3       | VCX3A      |
| PON1       | CD8A       |
| PNPO       | SOBP       |
| PNPLA7     | AL512408.1 |
| PLSCR4     | RELN       |
| PLPP3      | ZNF100     |
| PLG        | BMPER      |
| PLCXD3     | POU5F1B    |
| PLCL2      | CDH5       |
| PIPOX      | IL20       |
| PINK1      | EGF        |
| PIK3R1     | ACP5       |
| PIK3C2G    | AC024257.3 |
| PIGV       | LINC00880  |
| PIGR       | LINC02475  |
| PI4K2B     | GPR3       |
| PHYHD1     | HIST1H2BJ  |
| PHYH       | AL138976.2 |
| PGRMC1     | DLEU2_1    |
| PGM1       | AC010503.4 |
| PGLYRP2    | AC093495.1 |
| PFKFB1     | SP9        |
| PEX11G     | PIWIL2     |
| PECR       | CCDC150P1  |
| PEBP4      | ZNF430     |
| PDZRN4     | AL137002.2 |
| PDLIM5     | GAGE2A     |
| PDK4       | AL117209.1 |
| PDE7B      | TARID      |
| PDE3B      | TEX14      |
| PDE2A      | AC008406.3 |
| PCYOX1     | LHX9       |
| PCSK6      | PTHLH      |
| PCK2       | AC112220.4 |
| PCK1       | RNF157     |
| PCCB       | C1QTNF2    |
| PC         | P4HA3      |
| PBLD       | PTN        |
| PAPSS2     | TMEM200C   |
| PAPPA2     | KCNMB2-AS1 |
| PANK1      | TPM4       |
| PALM2AKAP2 | NAMPTP1    |
| PAH        | S1PR1      |

|         |            |
|---------|------------|
| P2RX3   | ABCB4      |
| OTC     | AC242426.3 |
| ORM2    | AC092279.2 |
| ORM1    | MXD1       |
| OMD     | ATF3       |
| OIT3    | PELI2      |
| OGDHL   | AC009163.7 |
| OAF     | PLAU       |
| NXF3    | AGT        |
| NUGGC   | AC087623.4 |
| NUDT7   | PGM2L1     |
| NUDT6   | AC008764.1 |
| NUDT12  | TRPM2-AS   |
| NTN3    | LINC01535  |
| NTF3    | C3orf52    |
| NR3C2   | AC016831.1 |
| NR1I3   | PTGS2      |
| NR1I2   | TNC        |
| NPY1R   | SLC6A14    |
| NOL4    | DAND5      |
| NNT     | PCDH15     |
| NLRP6   | ARHGAP6    |
| NLRP14  | AC068768.1 |
| NFIA    | AC008894.3 |
| NDST3   | RASGEF1B   |
| NDRG2   | KLHL35     |
| ND6     | PLPPR4     |
| ND5     | GANAB      |
| ND4L    | PLAT       |
| NAT2    | DLEU2_6    |
| NAT1    | ANPEP      |
| NAAA    | NFIX       |
| N4BP2L1 | NCAM1      |
| MYRIP   | ADGRF4     |
| MYO1B   | AC022400.6 |
| MYO16   | PACERR     |
| MYLK    | AC098614.1 |
| MTUS2   | LINC00882  |
| MTTP    | COCH       |
| MTHFS   | AC004477.1 |
| MTHFD1  | LINC01556  |
| MTARC2  | DMC1       |
| MT2A    | FNDC4      |
| MT1X    | CADPS2     |

|                       |            |
|-----------------------|------------|
| MT1M                  | PRTFDC1    |
| MT1G                  | NR4A3      |
| MT1E                  | ZNF253     |
| MSRA                  | VGf        |
| MROH2A                | AC126544.1 |
| MRO                   | ZNF658     |
| MRC1                  | C4orf19    |
| MPDZ                  | NECAB1     |
| MOGAT2                | LINC01126  |
| MOGAT1                | ZNF616     |
| MMUT                  | SPOCD1     |
| MME                   | ZNF93      |
| MMAA                  | ZBTB43     |
| MLYCD                 | KCNS3      |
| MLIP                  | CXCL2      |
| MIP                   | NEUROG2    |
| MICU3                 | EMP1       |
| MGST1                 | TMEM33     |
| MFSD2A                | AP001350.2 |
| MFAP3L                | GEM        |
| METTL7A               | DUSP10     |
| MEP1B                 | C1orf140   |
| MEGF10                | USP51      |
| MCC                   | G3BP2      |
| MBL2                  | AC017100.1 |
| MAT1A                 | STX12      |
| MASP2                 | MESP2      |
| MASP1                 | SEPT4      |
| MAP3K5                | AC092720.1 |
| MAOB                  | ZNF184     |
| MAN1C1                | AL162377.1 |
| LYVE1                 | VASH2      |
| LYPD2                 | ZNF14      |
| LRRC3                 | CRYAB      |
| LRRC2                 | CXCL8      |
| LRCOL1                | VDAC1P8    |
| LPIN2                 | ZNF714     |
| LPA                   | TAPT1-AS1  |
| LONP2                 | AL162595.1 |
| LOC107987479; CYP2D6; | MEMO1P1    |
| LOC107987478          |            |
| LOC101929773          | SLC25A21   |
| LOC100132813          | SYT11      |
| LIPG                  | MRAS       |

|          |            |
|----------|------------|
| LINGO4   | OLFML2B    |
| LILRB5   | RPL18P13   |
| LGI1     | LGALS8-AS1 |
| LEPR     | AC004803.1 |
| LECT2    | LYPD6      |
| LEAP2    | RNF185     |
| LDHD     | FGB        |
| LDB2     | AL513523.1 |
| LCAT     | RYR2       |
| KNG1     | ZNF736     |
| KMO      | HIST1H2BD  |
| KLRF1    | AC087499.1 |
| KLKB1    | SGIP1      |
| KLHL2    | IGFBP1     |
| KLF9     | ZFAND4     |
| KLF15    | TOX3       |
| KIAA2012 | COL24A1    |
| KHK      | AL451074.2 |
| KDR      | TM4SF1     |
| KDM8     | SELPLG     |
| KCNN2    | LINC01116  |
| KCNK17   | ZNF91      |
| KCNJ8    | EXOC3-AS1  |
| KCND3    | ZNF204P    |
| KCNB1    | ZNF154     |
| KBTBD11  | GNPDA1     |
| KAT2B    | RDH5       |
| IYD      | YEATS2-AS1 |
| IVD      | AL135838.1 |
| ITIH3    | RNF138     |
| ITIH1    | TSLP       |
| ISOC1    | NES        |
| IQSEC3   | DPY19L2P2  |
| IQGAP2   | INHBA      |
| INS-IGF2 | CRCP       |
| INSIG1   | CREB5      |
| INMT     | SLC2A3     |
| INHBC    | LMTK3      |
| IL33     | PRSS22     |
| IL27     | EOMES      |
| IL1RL1   | SESN2      |
| IL1RAPL2 | ERV3-1     |
| IL18R1   | ASB1       |
| IGFBP4   | ZNF25      |

|          |             |
|----------|-------------|
| IGFALS   | AC092143.3  |
| IGF1     | AC096733.2  |
| IFIT1    | ZNF426      |
| IDO2     | C19orf57    |
| IDNK     | PDK4        |
| HTR2A    | MAGEA2B     |
| HSD3B2   | NKX3-1      |
| HSD3B1   | EFHC2       |
| HSD17B6  | PAG1        |
| HSD17B4  | TRIB3       |
| HSD17B13 | NFATC2      |
| HSD11B1  | CXXC4       |
| HRG      | ZNF680      |
| HPX      | RUNDC3B     |
| HPR      | RRAGD       |
| HPD      | SPINK1      |
| HP       | AC074091.1  |
| HORMAD2  | GOLT1A      |
| HOMER2   | AC080080.1  |
| HMGN5    | LINC00957   |
| HMGCS2   | NACAD       |
| HMGCLL1  | AC133065.4  |
| HMGCL    | IL6R        |
| HLF      | ZNF572      |
| HJV      | LIMK1       |
| HIBADH   | LINC00518   |
| HHIP     | LPP-AS2     |
| HGFAC    | ZNF766      |
| HGD      | ITGA7       |
| HERC5    | B4GALT1-AS1 |
| HERC3    | RRM2        |
| HEPACAM  | KLF6        |
| HDC      | ZNF554      |
| HAO2     | THBS1       |
| HAO1     | AC009779.3  |
| HAMP     | IGFN1       |
| HAGH     | ZDHHC16     |
| HADH     | B4GALT4-AS1 |
| HAAO     | SERPING1    |
| GYS2     | RCN3        |
| GSTZ1    | ZMAT1       |
| GSTA2    | RGS2        |
| GSTA1    | AL606834.2  |
| GRIN2B   | AC073072.1  |



|                  |            |
|------------------|------------|
| GRIA3            | CTSH       |
| GRHPR            | ZNF726     |
| GREM2            | LONRF1     |
| GRAMD1C          | THRB       |
| GPT2             | SAMD12     |
| GPT              | TXNIP      |
| GPR88            | MIR503HG   |
| GPR182           | GALNT13    |
| GPR146           | TBC1D9     |
| GPM6A            | ZNF845     |
| GPLD1            | FGD4       |
| GPHN             | AC005332.7 |
| GPD1             | SLC9A3     |
| GOT2             | TRIML2     |
| GOLGA6B          | GEN1       |
| GOLGA6A          | ZNF429     |
| GNMT; CNPY3-GNMT | AC015660.1 |
| GNE              | RASAL2     |
| GNAO1            | MIATNB     |
| GNA14            | ZNF528-AS1 |
| GMNC             | C3orf67    |
| GLYCTK           | PERP       |
| GLYATL3          | AC006252.1 |
| GLYATL1          | TMX3       |
| GLYAT            | ADAMTS3    |
| GLS2             | BAALC-AS1  |
| GLOD5            | MOXD1      |
| GJB2             | SCARB2     |
| GIPC2            | GNA11      |
| GHR              | AP000695.2 |
| GFRA1            | CHST14     |
| GNF              | SNX10      |
| GDF2             | AL355001.2 |
| GDA              | RGS19      |
| GCKR             | NTN3       |
| GCK              | PARM1      |
| GCH1             | C1QTNF6    |
| GCGR             | AC093010.3 |
| GCDH             | FAM173B    |
| GC               | NLGN4X     |
| GBP7             | TTC33      |
| GBA3             | AC073508.2 |
| GATM             | LINGO2     |
| GASK1A           | IKZF2      |

|           |             |
|-----------|-------------|
| GALNT15   | LINC02228   |
| GADD45A   | ZNF134      |
| GABARAPL1 | AL358472.4  |
| G6PC      | HSD17B14    |
| FYB2      | AL158151.3  |
| FXVD1     | DGAT2       |
| FUCA1     | GPR173      |
| FTCDNL1   | EPDR1       |
| FTCD      | HIVEP3      |
| FRRS1     | C18orf54    |
| FRMD7     | CTSL        |
| FREM2     | HIST1H4H    |
| FOSB      | RDM1        |
| FOLH1B    | MEX3D       |
| FOLH1     | LBX2-AS1    |
| FNDC5     | FICD        |
| FMO5      | AC092645.1  |
| FMO4      | SNAI2       |
| FMO3      | FOXP4       |
| FMO2      | ZNF860      |
| FITM1     | GALNT3      |
| FGGY      | CLUHP3      |
| FGG       | SERPINB4    |
| FGB       | HABP4       |
| FGA       | TCF19       |
| FETUB     | ATP8B2      |
| FCN3      | ZNF211      |
| FCN2      | AC096887.2  |
| FCAMR     | AL117336.3  |
| FBXO8     | DENND5B-AS1 |
| FBP1      | GUCY1A2     |
| FAXDC2    | ZNF615      |
| FAT4      | WDFY3-AS2   |
| FAS       | CRISPLD2    |
| FAM180A   | TVP23A      |
| FAM163B   | ADAMTS5     |
| FAM149A   | HIST1H3D    |
| FAM13A    | HIST2H2BE   |
| FAH       | DLEU2       |
| F9        | SYT1        |
| F8        | UBE2D1      |
| F7        | CXCL3       |
| F5        | ZNF165      |
| F2        | ADTRP       |

|          |            |
|----------|------------|
| F13B     | ZFP37      |
| F12      | FLT3LG     |
| F11      | SERPINB3   |
| EXPH5    | PSMB8-AS1  |
| ETNPPL   | KALRN      |
| ETNK2    | AL133346.1 |
| ETFRF1   | LCORL      |
| ETFDH    | C14orf28   |
| ETFBKMT  | AC037198.1 |
| ESR1     | PLCL1      |
| ESPN     | KCNH1      |
| ERICH3   | CTAGE7P    |
| EPHX2    | RSP03      |
| EPHX1    | GPR183     |
| ENTPD5   | BIRC7      |
| ENPP7    | MYBL1      |
| ENPEP    | VIL1       |
| ELFN1    | MED11      |
| EHHADH   | AL513550.1 |
| EDNRB    | DLG2       |
| EDEM1    | AL606489.1 |
| ECM2     | ZNF17      |
| ECHS1    | DDIT3      |
| ECHDC2   | KRBA2      |
| DUSP10   | ZNF675     |
| DUSP1    | SLC7A8     |
| DSG1     | AL121944.1 |
| DRD1     | AC241585.1 |
| DPYS     | ZNF26      |
| DPT      | ZNF45      |
| DPF3     | SPOPL      |
| DNASE1L3 | FUT4       |
| DNAJC25  | FNDC10     |
| DNAH6    | IL6        |
| DMGDH    | ATF1       |
| DMD      | BOLA3-AS1  |
| DLGAP2   | ZMYND10    |
| DLG2     | BHLHE41    |
| DIRAS3   | LATS2      |
| DIO1     | MYO15B     |
| DHTKD1   | B4GALT1    |
| DHRS4L1  | GPR143     |
| DHRS1    | AC092295.2 |
| DHODH    | GRIN1      |

|         |          |
|---------|----------|
| DEPDC7  | PRR16    |
| DDX60L  | UBE2Q2P1 |
| DDX60   | PDE9A    |
| DCXR    | CREBRF   |
| DCAF11  | GPAT3    |
| DBT     | ZNF227   |
| DBH     | ZNF484   |
| DAO     | POMK     |
| CYTB    | ZNF257   |
| CYP8B1  | ZNF84    |
| CYP7B1  | ETAA1    |
| CYP7A1  |          |
| CYP4X1  |          |
| CYP4V2  |          |
| CYP4F3  |          |
| CYP4F2  |          |
| CYP4F12 |          |
| CYP4F11 |          |
| CYP4A22 |          |
| CYP4A11 |          |
| CYP3A43 |          |
| CYP3A4  |          |
| CYP39A1 |          |
| CYP2U1  |          |
| CYP2J2  |          |
| CYP2C9  |          |
| CYP2C8  |          |
| CYP2C19 |          |
| CYP2C18 |          |
| CYP2B6  |          |
| CYP2A7  |          |
| CYP2A6  |          |
| CYP2A13 |          |
| CYP27A1 |          |
| CYP26A1 |          |
| CYP1A2  |          |
| CYP1A1  |          |
| CYB5A   |          |
| CXorf66 |          |
| CWH43   |          |
| CUX2    |          |
| CTSO    |          |
| CTNNA3  |          |
| CTH     |          |

CTBS  
CRYZL2P-SEC16B; SEC16B  
CRYL1  
CRYBG1  
CRYAA  
CRHBP  
CPT2  
CPS1  
CPN2  
CPED1  
CPEB3  
CPB2  
CP  
COLEC10  
COL25A1  
COL18A1  
COBLL1  
CNTN3  
CNDP1  
CMBL  
CLYBL  
CLTRN  
CLEC4M  
CLEC4G  
CLEC3B  
CLEC1B  
CIDEB  
CHRNA4  
CHRM2  
CHAD  
CGNL1  
CFI  
CFHR5  
CFHR4  
CFHR3  
CFHR2  
CFHR1  
CFH  
CFB  
CFAP57  
CETP  
CES5A  
CES4A  
CES3

CES2  
CES1  
CDO1  
CDHR5  
CDH23  
CDC37L1  
CDC14B  
CDA  
CD5L  
CD302  
CD300LG  
CD1D  
CD14  
CCL23  
CCL16  
CCL14  
CCDC38  
CCDC196  
CCDC158  
CCBE1  
CBR4  
CAT  
CAMK2B  
CA5A  
CA2  
C9  
C8B  
C8A  
C7  
C6  
C4orf19  
C4BPA  
C3orf85  
C3  
C1S  
C1RL  
C1R  
C14orf180  
C11orf54  
BTD  
BMX  
BMPER  
BMP10  
BMERB1

BHMT2  
BHMT  
BDH1  
BCO2  
BCKDHB  
BCHE  
BBOX1  
BAAT  
AZGP1  
AVPR1A  
AUTS2  
ATP11C  
ATOH8  
ASXL3  
ASS1  
ASPDH  
ASPA  
ARSF  
ARSD  
ARRDC4  
ARPP21  
ARID3C  
ARHGAP42  
ARHGAP20  
ARG1  
AR  
AQP9  
APOL6  
APOH  
APOF  
APOC4  
APOC3  
APOB  
APOA5  
APCS  
APBA1  
AOX1  
ANXA10  
ANO3  
ANO1  
ANKS4B  
ANGPTL6  
ANGPTL3  
ANGPTL1

ANG  
AMDHD1  
AMBP  
ALPL  
ALDOB  
ALDH9A1  
ALDH8A1  
ALDH7A1  
ALDH6A1  
ALDH5A1  
ALDH2  
ALDH1L1  
ALDH1A1  
ALB  
ALAD  
AKR7A3  
AKR1D1  
AKAP6  
AKAP3  
AHSG  
AGXT2  
AGXT  
AGMO  
AGMAT  
AGL  
AFM  
ADRB2  
ADRA2B  
ADRA1B  
ADRA1A  
ADI1  
ADHFE1  
ADH7  
ADH6  
ADH4  
ADH1C  
ADH1B  
ADH1A  
ADGRG7  
ADGRA3  
ADCY1  
ADAMTSL3  
ACY3  
ACVR1C



ACSM5  
ACSM3  
ACSM2B  
ACSM2A  
ACSL5  
ACSL1  
ACOX2  
ACOX1  
ACOT12  
ACO1  
ACMSD  
ACKR2  
ACE2  
ACBD4  
ACAT1  
ACADSB  
ACADS  
ACADM  
ACADL  
ACAD11  
ACACB  
ACAA2  
ACAA1  
ABHD6  
ABHD2  
ABCG8  
ABCG5  
ABCG2  
ABCC9  
ABCC6  
ABCC11  
ABCB4  
ABCB11  
ABCA9  
ABCA8  
ABCA6  
ABAT  
AASS  
AADAT  
AADAC  
A1CF  
A1BG
