# Supplementary figures and images for: LncRNA SNHG17 Contributes to Proliferation, Migration, and Poor Prognosis of Hepatocellular Carcinoma
Source: Hindawi journal article supplement (doi:10.1155/2021/9990338), 2021-01-01

**A****Hep3B**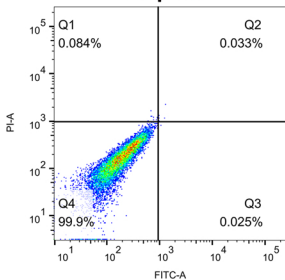**unstained****B****SMMC-7721**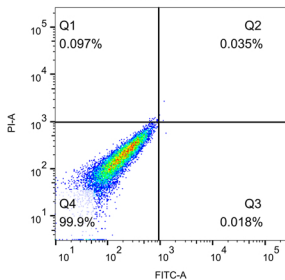**unstained****stained**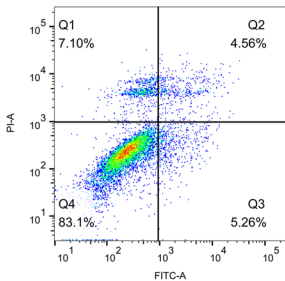**stained**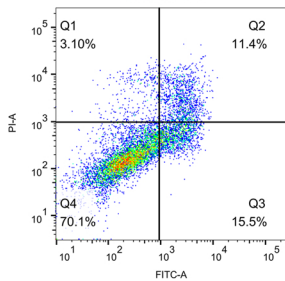

Supplement: f1 [file 9990338.f1.zip]

**A**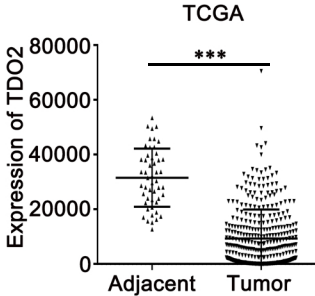**(b)**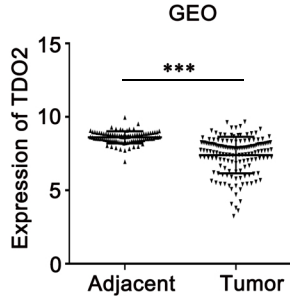**B****(a)**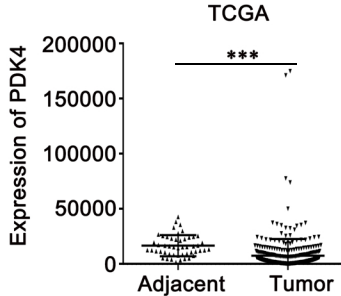**(b)**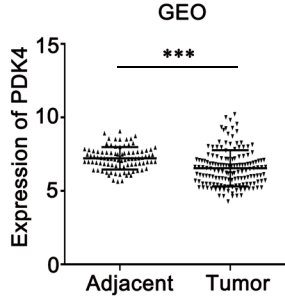

Supplement: f1 [file 9990338.f1.zip]

Univariate analysis

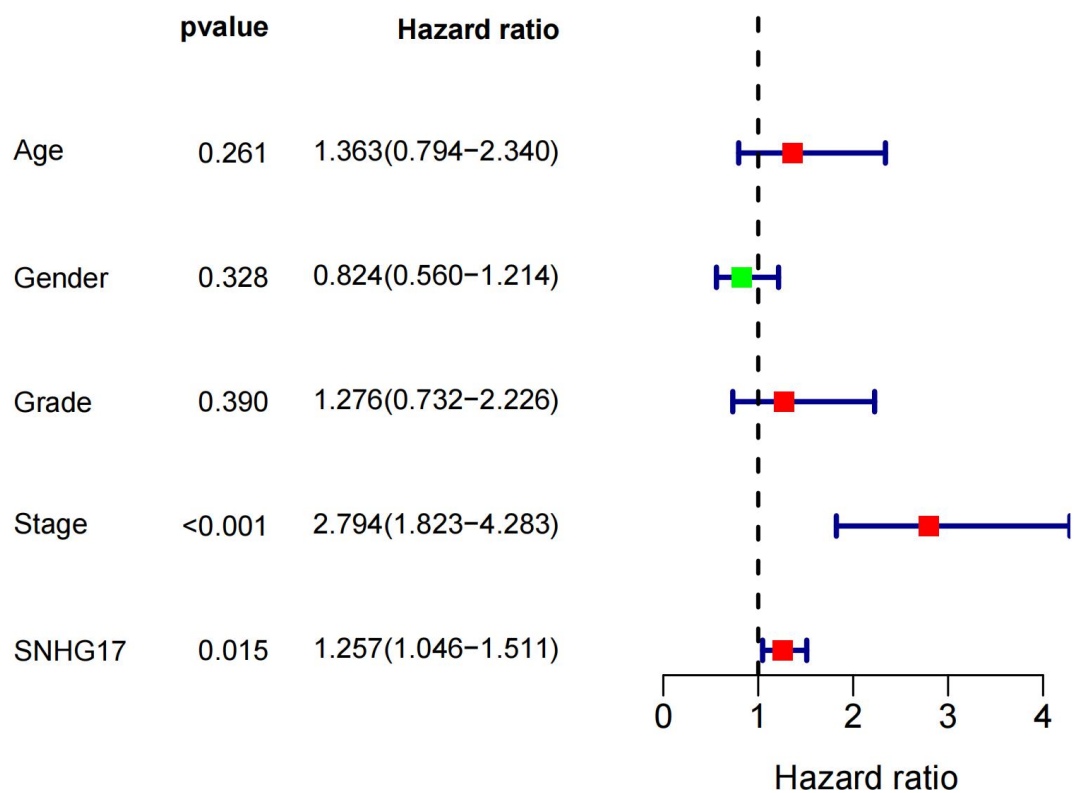

Multivariate analysis

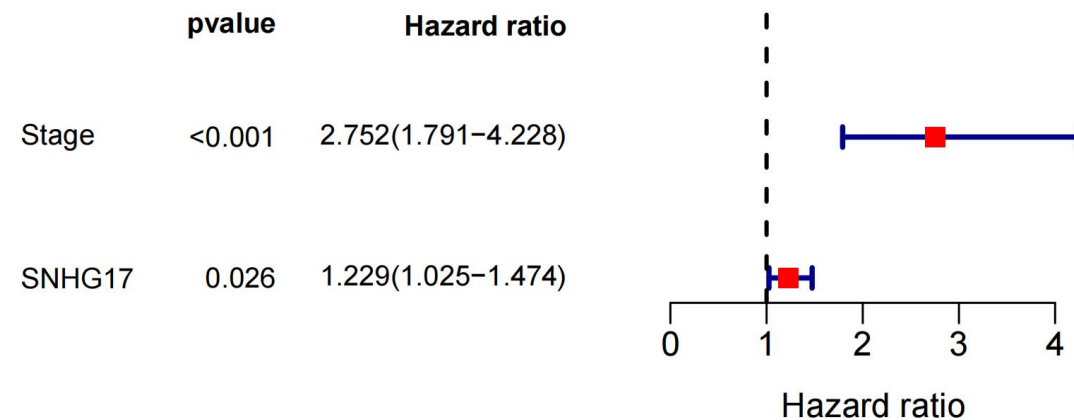

Supplement: f1 [file 9990338.f1.zip]

Univariate analysis

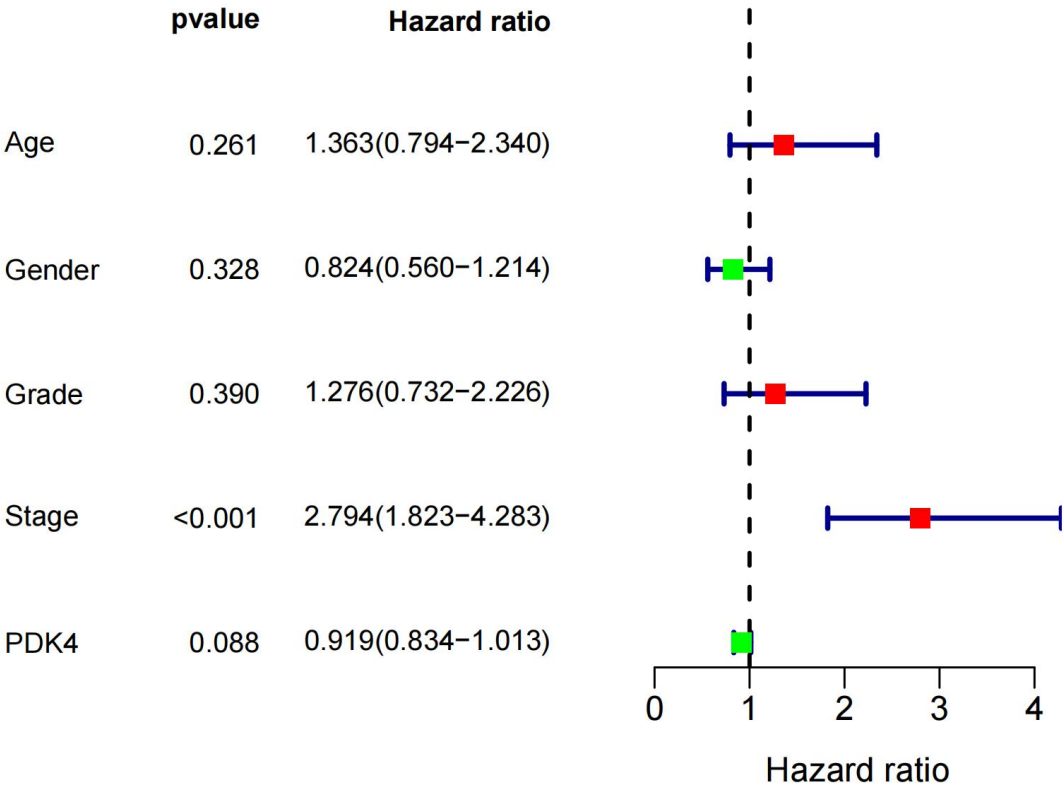

Multivariate analysis

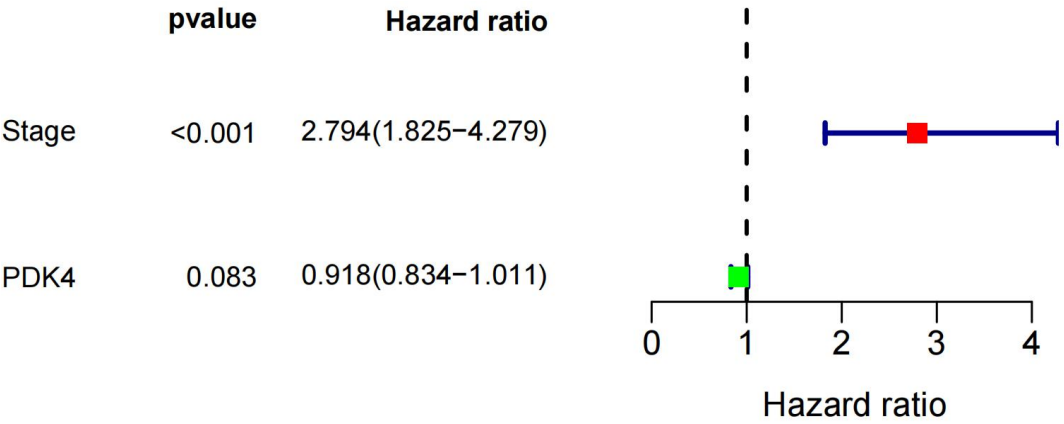

Supplement: f1 [file 9990338.f1.zip]

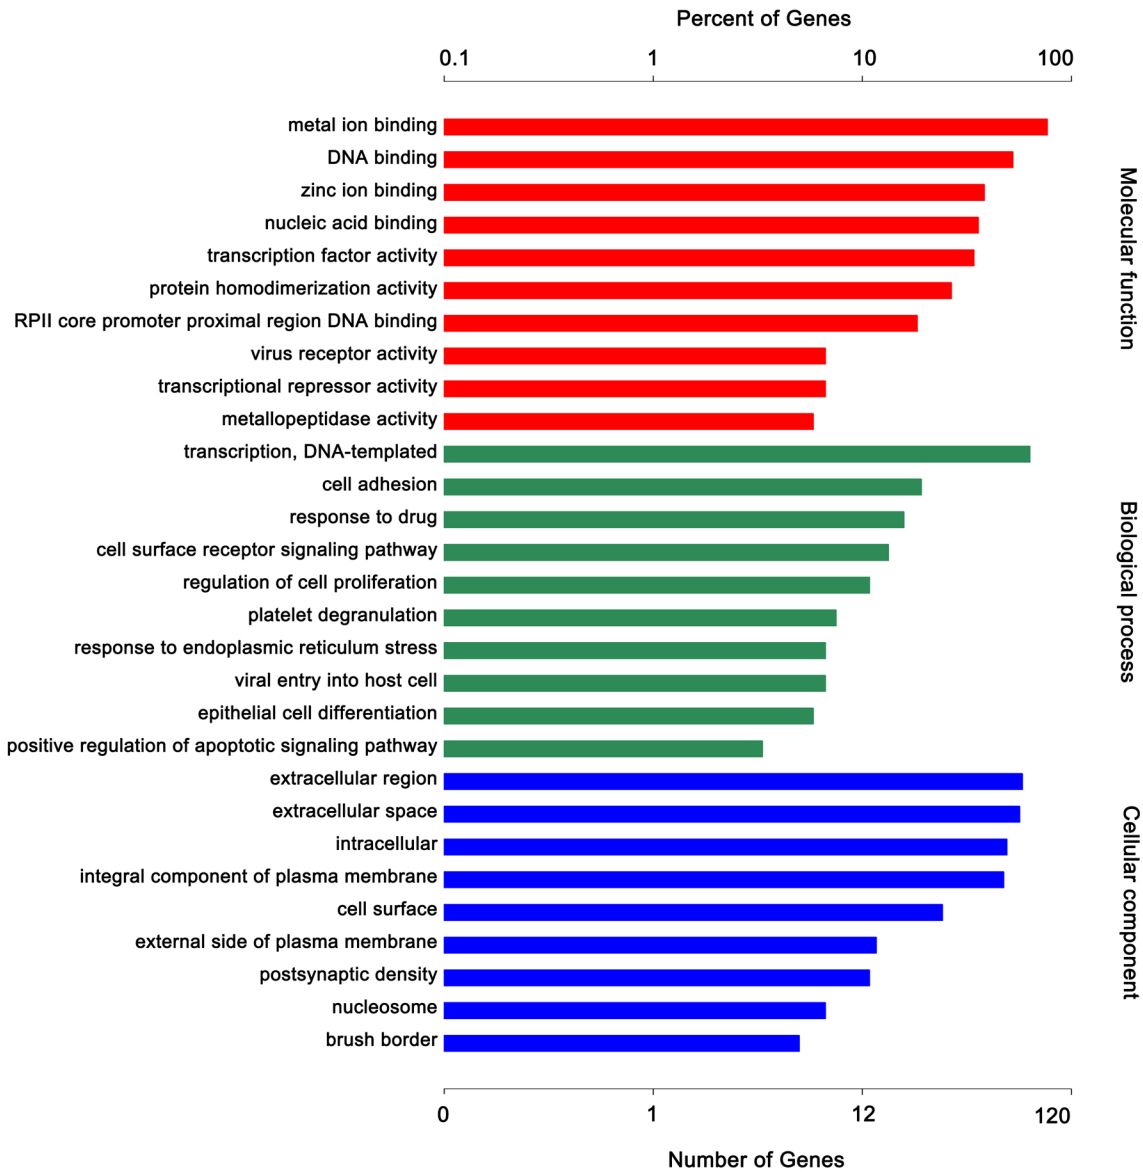

Supplement: f1 [file 9990338.f1.zip]

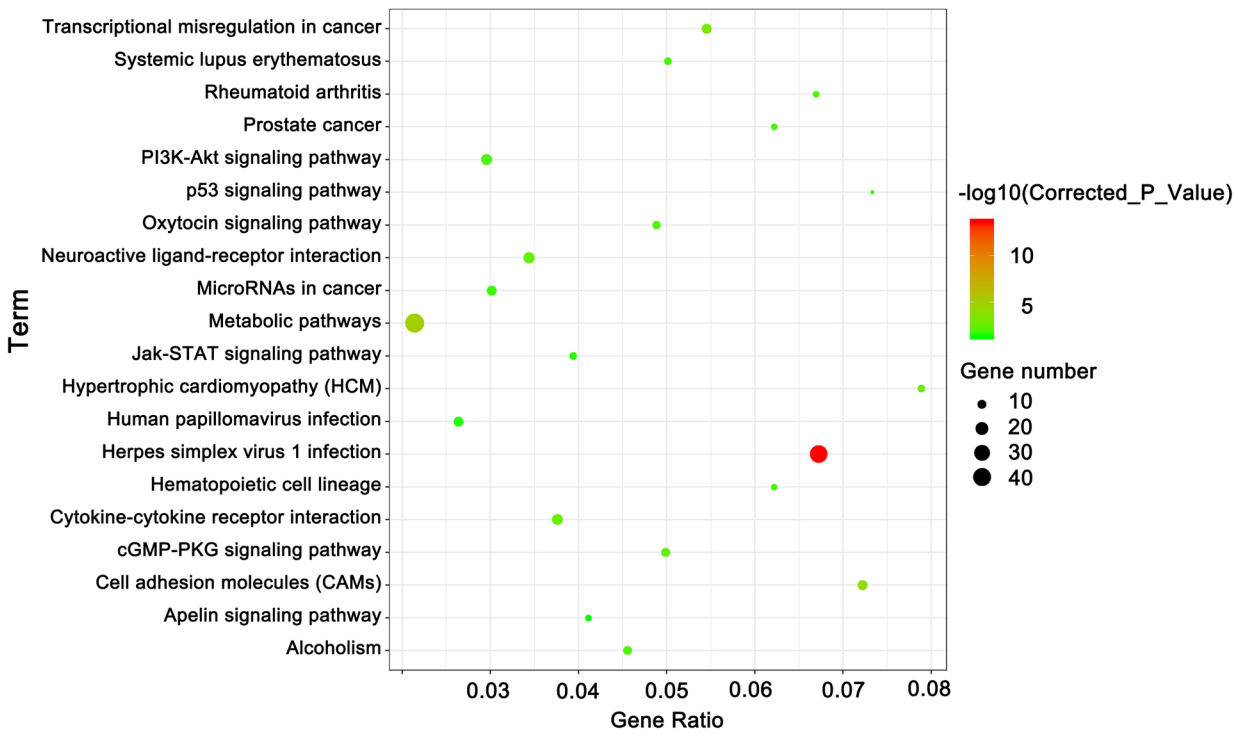

Supplement: f1 [file 9990338.f1.zip]

**A**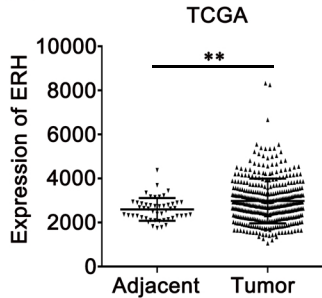**(b)**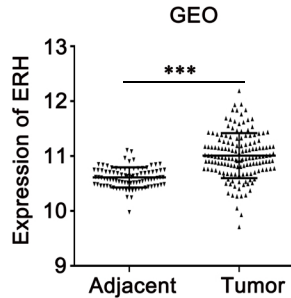**B****(a)**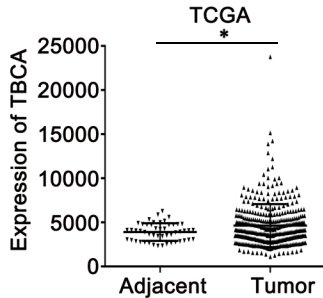**(b)**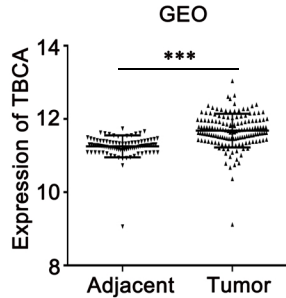

Supplement: f1 [file 9990338.f1.zip]

Univariate analysis

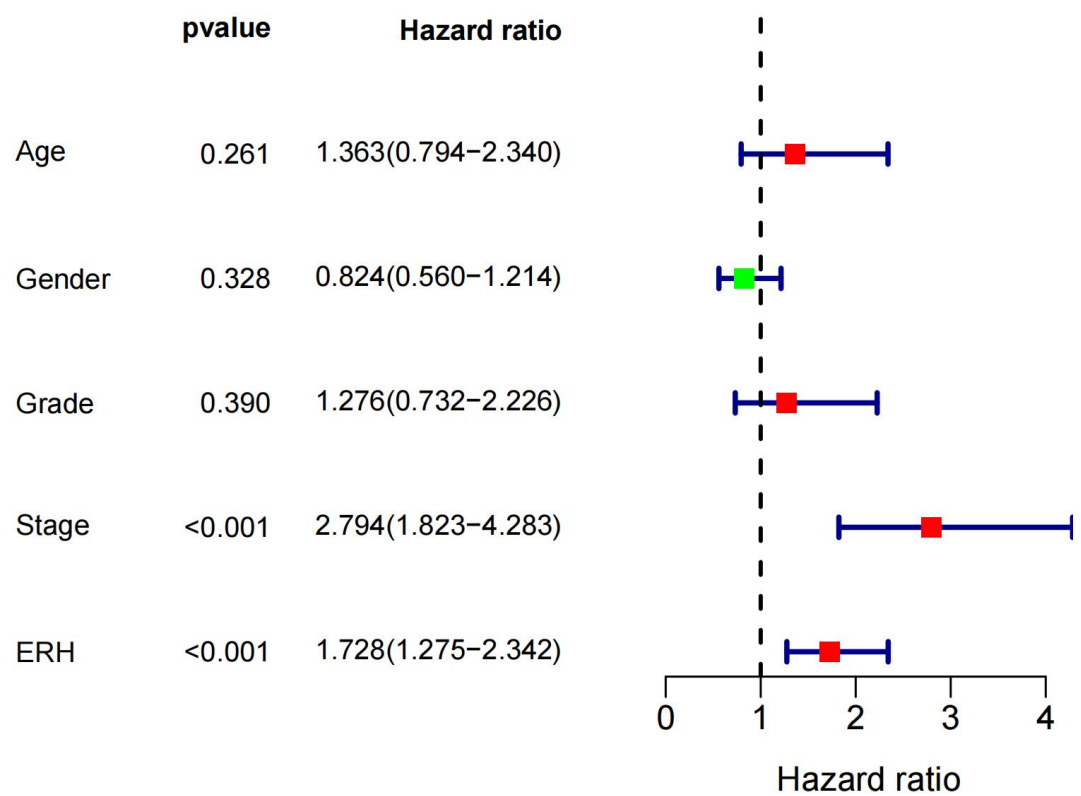

Multivariate analysis

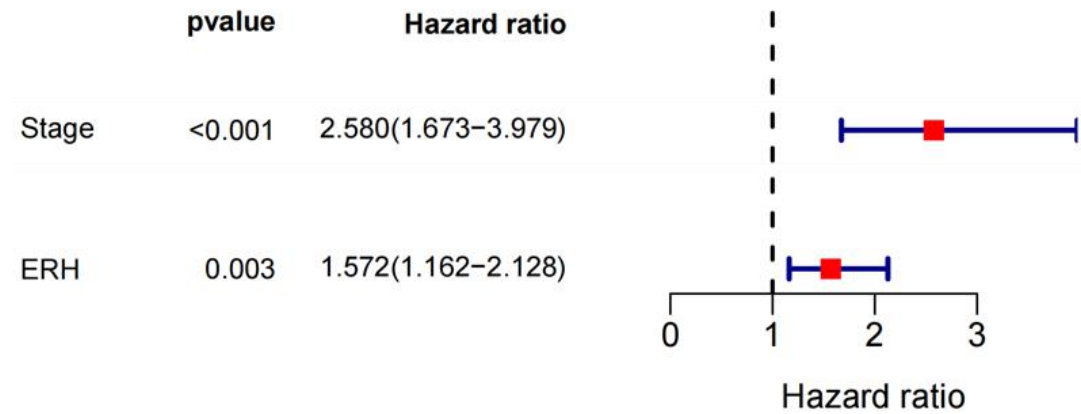

Supplement: f1 [file 9990338.f1.zip]

**A**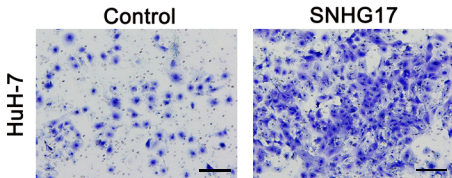**B**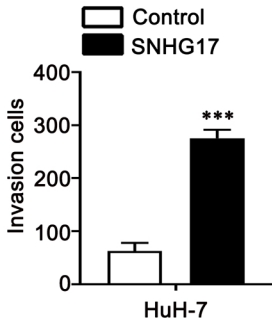

Supplement: f1 [file 9990338.f1.zip]
